# Supplementary material
Source: PubMed Central journal article supplement (PMC7124996)
Supplement: NIHMS1562960-supplement-1.pdf [file NIHMS1562960-supplement-1.pdf]

**Structure elucidation and absolute configuration of metabolites from the soil-derived fungus  
*Dictyosporium digitatum* using spectroscopic and computational methods**

Trong D. Tran<sup>a,1</sup>, Brice A. P. Wilson<sup>a</sup>, Curtis J. Henrich<sup>a,b</sup>, Karen L. Wendt<sup>c</sup>, Jarrod King<sup>c</sup>, Robert H. Cichewicz<sup>c</sup>, Alberto M. Stchigel<sup>d</sup>, Andrew N. Miller<sup>e</sup>, Barry R. O’Keefe<sup>a,f</sup>, Kirk R. Gustafson<sup>a,\*</sup>

<sup>a</sup> Molecular Targets Program, Center of Cancer Research, National Cancer Institute, Frederick, Maryland 21702-1201, United States

<sup>b</sup> Basic Science Program, Frederick National Laboratory for Cancer Research, Frederick, Maryland 21702-1201, United States

<sup>c</sup> Natural Products Discovery Group, Department of Chemistry and Biochemistry, University of Oklahoma, Norman, Oklahoma, 73019-5251, United States

<sup>d</sup> Mycology Unit, Universitat Rovira i Virgili, C/ Sant Llorenç 21, 43201 Reus, Spain

<sup>e</sup> University of Illinois, Illinois Natural History Survey, 1816 South Oak Street, Champaign, IL 61820-6970, United States

<sup>f</sup> Natural Products Branch, Developmental Therapeutics Program, Division of Cancer Treatment and Diagnosis, National Cancer Institute, Frederick, Maryland 21702-1201, United States

<sup>1</sup> GeneCology Research Centre, University of the Sunshine Coast, Maroochydore DC, Queensland 4558, Australia

**Supplementary data**

**Table S1.** NMR Spectroscopic Data for **1**

**Table S2.** NMR Spectroscopic Data for **2**

**Table S3.** NMR Spectroscopic Data for **3**

**Table S4.** NMR Spectroscopic Data for **4**

**Table S5.** NMR Spectroscopic Data for **5**

**Table S6.** Comparison of Experimental and Calculated  $^{13}\text{C}$  and  $^1\text{H}$  NMR Chemical Shifts in  $\text{DMSO-}d_6$  for (3*R*, 8*R*)-**5** and (3*R*, 8*S*)-**5**

**Table S7.** NMR Spectroscopic Data for **6**

**Table S8.** NMR Spectroscopic Data for **7** ( $\text{DMSO-}d_6$ )

**Table S9.** NMR Spectroscopic Data for **8** ( $\text{DMSO-}d_6$ )

**Table S10.** NMR Spectroscopic Data for **9** ( $\text{DMSO-}d_6$ )

**Table S11.** NMR Spectroscopic Data for **10** ( $\text{DMSO-}d_6$ )

**Table S12.** NMR Spectroscopic Data for **11** ( $\text{DMSO-}d_6$ )

**Table S13.** NMR Spectroscopic Data for **12** ( $\text{DMSO-}d_6$ )

**Table S14.** Proton chemical shift differences between (*S*)-MTPA Ester of **1** (**1a**) and (*R*)-MTPA Ester of **1** (**1b**) in  $\text{Pyridine-}d_5$

**Table S15.** Proton chemical shift differences between (*S*)-MTPA Ester of **2** (**2a**) and (*R*)-MTPA Ester of **2** (**2b**) in  $\text{Pyridine-}d_5$

**Table S16.** Proton chemical shift differences between (*S*)-MTPA Ester of **11** (**11a**) and (*R*)-MTPA Ester of **11** (**11b**) in  $\text{Pyridine-}d_5$

**Table S17.** Proton chemical shift differences between (*S*)-MTPA Ester of **12** (**12a**) and (*R*)-MTPA Ester of **12** (**12b**) in  $\text{Pyridine-}d_5$

**Table S18.** Proton chemical shift differences between (*S*)-MTPA Ester of **13** (**13a**) and (*R*)-MTPA Ester of **13** (**13b**) in  $\text{Pyridine-}d_5$

**Figure S1.**  $^1\text{H}$  Spectrum of **1** in  $\text{DMSO-}d_6$

**Figure S2.**  $^{13}\text{C}$  Spectrum of **1** in  $\text{DMSO-}d_6$

**Figure S3.** HSQC Spectrum of **1** in  $\text{DMSO-}d_6$

**Figure S4.** COSY Spectrum of **1** in  $\text{DMSO-}d_6$

**Figure S5.** HMBC Spectrum of **1** in  $\text{DMSO-}d_6$

**Figure S6.** 1D NOESY Spectra of **1** in  $\text{DMSO-}d_6$

**Figure S7.**  $^1\text{H}$  Spectrum of **2** in  $\text{DMSO-}d_6$

**Figure S8.**  $^{13}\text{C}$  Spectrum of **2** in  $\text{DMSO-}d_6$

**Figure S9.** HSQC Spectrum of **2** in  $\text{DMSO-}d_6$

**Figure S10.** COSY Spectrum of **2** in  $\text{DMSO-}d_6$

**Figure S11.** HMBC Spectrum of **2** in  $\text{DMSO-}d_6$

**Figure S12.** 2D ROESY Spectra of **2** in  $\text{DMSO-}d_6$

**Figure S13.**  $^1\text{H}$  Spectrum of **3** in  $\text{DMSO-}d_6$

**Figure S14.**  $^{13}\text{C}$  Spectrum of **3** in  $\text{DMSO-}d_6$

**Figure S15.** HSQC Spectrum of **3** in  $\text{DMSO-}d_6$

**Figure S16.** COSY Spectrum of **3** in  $\text{DMSO-}d_6$

**Figure S17.** HMBC Spectrum of **3** in DMSO-*d*<sub>6</sub>  
**Figure S18.** 2D NOESY Spectra of **3** in DMSO-*d*<sub>6</sub>  
**Figure S19.** 1D NOESY Spectrum of **3** (irradiated at 4.47ppm) in DMSO-*d*<sub>6</sub>  
**Figure S20.** <sup>1</sup>H Spectrum of **4** in DMSO-*d*<sub>6</sub>  
**Figure S21.** <sup>13</sup>C Spectrum of **4** in DMSO-*d*<sub>6</sub>  
**Figure S22.** HSQC Spectrum of **4** in DMSO-*d*<sub>6</sub>  
**Figure S23.** COSY Spectrum of **4** in DMSO-*d*<sub>6</sub>  
**Figure S24.** HMBC Spectrum of **4** in DMSO-*d*<sub>6</sub>  
**Figure S25.** 2D ROESY Spectra of **4** in DMSO-*d*<sub>6</sub>  
**Figure S26.** 1D NOESY Spectra of **4** in DMSO-*d*<sub>6</sub>  
**Figure S27.** <sup>1</sup>H Spectrum of **5** in DMSO-*d*<sub>6</sub>  
**Figure S28.** <sup>13</sup>C Spectrum of **5** in DMSO-*d*<sub>6</sub>  
**Figure S29.** HSQC Spectrum of **5** in DMSO-*d*<sub>6</sub>  
**Figure S30.** COSY Spectrum of **5** in DMSO-*d*<sub>6</sub>  
**Figure S31.** HMBC ( $J_{\text{HC}} = 8$  Hz) Spectrum of **5** in DMSO-*d*<sub>6</sub>  
**Figure S32.** HMBC ( $J_{\text{HC}} = 3$  Hz) Spectrum of **5** in DMSO-*d*<sub>6</sub>  
**Figure S33.** <sup>1</sup>H Spectrum of **6** in DMSO-*d*<sub>6</sub>  
**Figure S34.** <sup>13</sup>C Spectrum of **6** in DMSO-*d*<sub>6</sub>  
**Figure S35.** HSQC Spectrum of **6** in DMSO-*d*<sub>6</sub>  
**Figure S36.** COSY Spectrum of **6** in DMSO-*d*<sub>6</sub>  
**Figure S37.** HMBC ( $J_{\text{HC}} = 8$  Hz) Spectrum of **6** in DMSO-*d*<sub>6</sub>  
**Figure S38.** HMBC ( $J_{\text{HC}} = 2$  Hz) Spectrum of **6** in DMSO-*d*<sub>6</sub>  
**Figure S39.** 1D NOESY Spectrum of **6** in DMSO-*d*<sub>6</sub>  
**Figure S40.** <sup>1</sup>H Spectrum of **7** in DMSO-*d*<sub>6</sub>  
**Figure S41.** <sup>13</sup>C Spectrum of **7** in DMSO-*d*<sub>6</sub>  
**Figure S42.** HSQC Spectrum of **7** in DMSO-*d*<sub>6</sub>  
**Figure S43.** COSY Spectrum of **7** in DMSO-*d*<sub>6</sub>  
**Figure S44.** HMBC ( $J_{\text{HC}} = 8$  Hz) Spectrum of **7** in DMSO-*d*<sub>6</sub>  
**Figure S45.** HMBC ( $J_{\text{HC}} = 3$  Hz) Spectrum of **7** in DMSO-*d*<sub>6</sub>  
**Figure S46.** 2D ROESY Spectrum of **7** in DMSO-*d*<sub>6</sub>  
**Figure S47.** <sup>1</sup>H Spectrum of **8** in DMSO-*d*<sub>6</sub>  
**Figure S48.** <sup>13</sup>C Spectrum of **8** in DMSO-*d*<sub>6</sub>  
**Figure S49.** HSQC Spectrum of **8** in DMSO-*d*<sub>6</sub>  
**Figure S50.** HMBC ( $J_{\text{HC}} = 8$  Hz) Spectrum of **8** in DMSO-*d*<sub>6</sub>  
**Figure S51.** HMBC ( $J_{\text{HC}} = 2$  Hz) Spectrum of **8** in DMSO-*d*<sub>6</sub>

**Figure S52.**  $^1\text{H}$  Spectrum of **9** in  $\text{DMSO-}d_6$   
**Figure S53.**  $^{13}\text{C}$  Spectrum of **9** in  $\text{DMSO-}d_6$   
**Figure S54.** HSQC Spectrum of **9** in  $\text{DMSO-}d_6$   
**Figure S55.** HMBC Spectrum of **9** in  $\text{DMSO-}d_6$   
**Figure S56.**  $^1\text{H}$  Spectrum of **10** in  $\text{DMSO-}d_6$   
**Figure S57.**  $^{13}\text{C}$  Spectrum of **10** in  $\text{DMSO-}d_6$   
**Figure S58.** HSQC Spectrum of **10** in  $\text{DMSO-}d_6$   
**Figure S59.** COSY Spectrum of **10** in  $\text{DMSO-}d_6$   
**Figure S60.** HMBC Spectrum of **10** in  $\text{DMSO-}d_6$   
**Figure S61.**  $^1\text{H}$  Spectrum of **11** in  $\text{DMSO-}d_6$   
**Figure S62.**  $^{13}\text{C}$  Spectrum of **11** in  $\text{DMSO-}d_6$   
**Figure S63.** HSQC Spectrum of **11** in  $\text{DMSO-}d_6$   
**Figure S64.** COSY Spectrum of **11** in  $\text{DMSO-}d_6$   
**Figure S65.** HMBC Spectrum of **11** in  $\text{DMSO-}d_6$   
**Figure S66.**  $^1\text{H}$  Spectrum of **12** in  $\text{DMSO-}d_6$   
**Figure S67.** HSQC Spectrum of **12** in  $\text{DMSO-}d_6$   
**Figure S68.** COSY Spectrum of **12** in  $\text{DMSO-}d_6$   
**Figure S69.** HMBC Spectrum of **12** in  $\text{DMSO-}d_6$   
**Figure S70.**  $^1\text{H}$  Spectrum of (*S*)-MTPA Ester of **1** (**1a**) in  $\text{Pyridine-}d_5$   
**Figure S71.** COSY Spectrum of (*S*)-MTPA Ester of **1** (**1a**) in  $\text{Pyridine-}d_5$   
**Figure S72.** HSQC Spectrum of (*S*)-MTPA Ester of **1** (**1a**) in  $\text{Pyridine-}d_5$   
**Figure S73.**  $^1\text{H}$  Spectrum of (*R*)-MTPA Ester of **1** (**1b**) in  $\text{Pyridine-}d_5$   
**Figure S74.** COSY Spectrum of (*R*)-MTPA Ester of **1** (**1b**) in  $\text{Pyridine-}d_5$   
**Figure S75.** HSQC Spectrum of (*R*)-MTPA Ester of **1** (**1b**) in  $\text{Pyridine-}d_5$   
**Figure S76.**  $^1\text{H}$  Spectrum of (*S*)-MTPA Ester of **2** (**2a**) in  $\text{Pyridine-}d_5$   
**Figure S77.** COSY Spectrum of (*S*)-MTPA Ester of **2** (**2a**) in  $\text{Pyridine-}d_5$   
**Figure S78.** HSQC Spectrum of (*S*)-MTPA Ester of **2** (**2a**) in  $\text{Pyridine-}d_5$   
**Figure S79.**  $^1\text{H}$  Spectrum of (*R*)-MTPA Ester of **2** (**2b**) in  $\text{Pyridine-}d_5$   
**Figure S80.** COSY Spectrum of (*R*)-MTPA Ester of **2** (**2b**) in  $\text{Pyridine-}d_5$   
**Figure S81.** HSQC Spectrum of (*R*)-MTPA Ester of **2** (**2b**) in  $\text{Pyridine-}d_5$   
**Figure S82.**  $^1\text{H}$  Spectrum of (*S*)-MTPA Ester of **11** (**11a**) in  $\text{Pyridine-}d_5$   
**Figure S83.** COSY Spectrum of (*S*)-MTPA Ester of **11** (**11a**) in  $\text{Pyridine-}d_5$   
**Figure S84.**  $^1\text{H}$  Spectrum of (*R*)-MTPA Ester of **11** (**11b**) in  $\text{Pyridine-}d_5$   
**Figure S85.** COSY Spectrum of (*R*)-MTPA Ester of **11** (**11b**) in  $\text{Pyridine-}d_5$   
**Figure S86.**  $^1\text{H}$  Spectrum of (*S*)-MTPA Ester of **12** (**12a**) in  $\text{Pyridine-}d_5$



**Figure S87.** COSY Spectrum of (*S*)-MTPA Ester of **12 (12a)** in Pyridine-*d*<sub>5</sub>  
**Figure S88.** <sup>1</sup>H Spectrum of (*R*)-MTPA Ester of **12 (12b)** in Pyridine-*d*<sub>5</sub>  
**Figure S89.** COSY Spectrum of (*R*)-MTPA Ester of **12 (12b)** in Pyridine-*d*<sub>5</sub>  
**Figure S90.** <sup>1</sup>H Spectrum of (*S*)-MTPA Ester of **13 (13a)** in Pyridine-*d*<sub>5</sub>  
**Figure S91.** COSY Spectrum of (*S*)-MTPA Ester of **13 (13a)** in Pyridine-*d*<sub>5</sub>  
**Figure S92.** <sup>1</sup>H Spectrum of (*R*)-MTPA Ester of **13 (13b)** in Pyridine-*d*<sub>5</sub>  
**Figure S93.** <sup>1</sup>H Spectrum of (*R*)-MTPA Ester of **13 (13b)** in Pyridine-*d*<sub>5</sub>  
**Figure S94.** Experimental and calculated ECD spectra of **1-3**  
**Figure S95.** ROESY correlations and Mosher's ester analysis of **2**.  
**Figure S96.** COSY, HMBC, and ECD analysis of **5**.  
**Figure S97.** COSY, HMBC, NOESY, and ECD analysis of **6**.  
**Figure S98.** COSY, HMBC, and ECD analysis of **7**.  
**Figure S99.** COSY, HMBC, and ECD analysis of **10**.  
**Figure S100.** COSY, HMBC, and Mosher's ester analysis of **11**.  
**Figure S101.** Mosher's ester analysis of **12** and **13**.

**Table S1.** NMR Spectroscopic Data for **1** (DMSO-*d*<sub>6</sub>)

| Position | $\delta_C$ |                 | $\delta_H$ ( <i>J</i> in Hz)                                                   | COSY                  | NOESY                                                                                        | HMBC                                             |
|----------|------------|-----------------|--------------------------------------------------------------------------------|-----------------------|----------------------------------------------------------------------------------------------|--------------------------------------------------|
| 1        | 40.0       | CH <sub>2</sub> | H <sub>α</sub> : 1.73, d (17.4)<br>H <sub>β</sub> : 1.67, dd (5.4, 17.4)       | 2                     | 5<br>9 <sub>β</sub>                                                                          | 2, 3, 5, 9, 10<br>2, 3, 5, 9, 10, 4 <sub>w</sub> |
| 2        | 128.9      | CH              | 5.75, dd (4.8, 10.2)                                                           | 1 <sub>β</sub> , 3    | 5, 9 <sub>β</sub>                                                                            | 1, 4, 10                                         |
| 3        | 129.7      | CH              | 5.68, d (10.2)                                                                 | 2                     | 5, 9 <sub>β</sub>                                                                            | 1, 4, 5, 15                                      |
| 4        | 81.0       | C               |                                                                                |                       |                                                                                              |                                                  |
| 5        | 45.4       | CH              | 1.92, d (4.8)                                                                  | 6 <sub>β</sub>        | 1 <sub>α</sub> , 2, 3, 6 <sub>α</sub> , 14,<br>15 <sub>α</sub> , 15 <sub>β</sub> , 15-<br>OH | 7, 9, 10, 14, 15                                 |
| 6        | 27.4       | CH <sub>2</sub> | H <sub>α</sub> : 2.45, d (12.0)<br>H <sub>β</sub> : 1.74, dd (4.8, 12.0)       |                       | 5, 8-OH, 13 <sub>α</sub> ,<br>14                                                             | 4, 5, 8, 10<br>7, 8, 11                          |
| 7        | 86.4       | C               |                                                                                |                       |                                                                                              |                                                  |
| 8        | 69.9       | CH              | 3.61, t (4.8)                                                                  | 9 <sub>β</sub> , 8-OH | 9 <sub>α</sub> , 9 <sub>β</sub> , 13 <sub>α</sub> , 13                                       | 6, 7, 10, 11                                     |
| 9        | 39.0       | CH <sub>2</sub> | H <sub>α</sub> : 1.12, d (15.0)<br>H <sub>β</sub> : 2.07, dd (5.4, 14.4)       |                       | 8, 8-OH<br>1 <sub>β</sub> , 2, 3, 8                                                          | 5, 7, 8, 10, 14<br>1, 8, 10, 14                  |
| 10       | 31.4       | C               |                                                                                |                       |                                                                                              |                                                  |
| 11       | 146.8      | C               |                                                                                |                       |                                                                                              |                                                  |
| 12       | 19.4       | CH <sub>3</sub> | 1.71, s                                                                        |                       | 8, 8-OH                                                                                      | 7, 11, 13                                        |
| 13       | 111.2      | CH <sub>2</sub> | H <sub>α</sub> : 4.84, s<br>H <sub>β</sub> : 4.76, s                           |                       | 6 <sub>α</sub> , 8, 8-OH                                                                     | 7, 11, 12<br>7, 11, 12                           |
| 14       | 28.1       | CH <sub>3</sub> | 1.15, s                                                                        |                       | 5, 6 <sub>α</sub> , 8-OH                                                                     | 1, 5, 9, 10, 2 <sub>w</sub> , 4 <sub>w</sub>     |
| 15       | 66.6       | CH <sub>2</sub> | H <sub>α</sub> : 3.23, dd (5.4, 10.2)<br>H <sub>β</sub> : 3.13, dd (4.8, 10.2) | 15-OH<br>15-OH        | 5<br>5                                                                                       | 3, 4, 5<br>3, 4, 5                               |
| 8-OH     |            |                 | 4.52, d (3.0)                                                                  | 8                     | 6 <sub>α</sub> , 9 <sub>α</sub> , 13 <sub>α</sub> , 12,<br>14                                | 7, 8, 9                                          |
| 15-OH    |            |                 | 4.47, t (6.0)                                                                  | 15                    | 5                                                                                            | 4, 15                                            |

**Table S2.** NMR Spectroscopic Data for **2** (DMSO-*d*<sub>6</sub>)

| Position | $\delta_C$ |                 | $\delta_H$ ( <i>J</i> in Hz)                                                                                | COSY             | ROESY                                   | HMBC                                                               |
|----------|------------|-----------------|-------------------------------------------------------------------------------------------------------------|------------------|-----------------------------------------|--------------------------------------------------------------------|
| 1        | 53.9       | CH <sub>2</sub> | H <sub><math>\alpha</math></sub> : 2.29, d (14.4)<br>H <sub><math>\beta</math></sub> : 1.99 (overlap)       |                  | 3 $\alpha$ , 5, 14<br>9 $\beta$ , 14    | 2, 5, 9, 10, 14, 8 <sub>w</sub><br>2, 5, 9, 10, 14, 8 <sub>w</sub> |
| 2        | 209.5      | C               |                                                                                                             |                  |                                         |                                                                    |
| 3        | 49.8       | CH <sub>2</sub> | H <sub><math>\alpha</math></sub> : 2.44, d (17.4)<br>H <sub><math>\beta</math></sub> : 2.55, d (17.4)       |                  | 1 $\alpha$ , 15<br>15                   | 2, 4, 15<br>2, 4, 5                                                |
| 4        | 83.7       | C               |                                                                                                             |                  |                                         |                                                                    |
| 5        | 50.9       | CH              | 2.03, d (4.2)                                                                                               | 6 $\alpha$       | 1 $\alpha$ , 6 $\alpha$ , 14, 15        | 1, 7, 9, 10, 14                                                    |
| 6        | 28.5       | CH <sub>2</sub> | H <sub><math>\alpha</math></sub> : 2.59, d (12.0)<br>H <sub><math>\beta</math></sub> : 1.99 (overlap)       | 5                | 5, 13 $\alpha$ , 14<br>13 $\alpha$ , 15 | 4, 5, 8, 10<br>4, 5, 8, 10, 11                                     |
| 7        | 86.4       | C               |                                                                                                             |                  |                                         |                                                                    |
| 8        | 69.6       | CH              | 3.60, t (4.2)                                                                                               | 9 $\beta$ , 8-OH | 9 $\alpha$ , 9 $\beta$ , 12             | 6, 7, 10                                                           |
| 9        | 40.0       | CH <sub>2</sub> | H <sub><math>\alpha</math></sub> : 1.26, d (14.4)<br>H <sub><math>\beta</math></sub> : 1.53, dd (5.4, 14.4) | 8                | 8, 8-OH<br>1 $\beta$ , 3 $\beta$ , 8    | 5, 7, 8, 10, 14<br>1, 8, 10, 14                                    |
| 10       | 35.3       | C               |                                                                                                             |                  |                                         |                                                                    |
| 11       | 146.9      | C               |                                                                                                             |                  |                                         |                                                                    |
| 12       | 19.4       | CH <sub>3</sub> | 1.72, s                                                                                                     |                  | 8, 13 $\beta$                           | 7, 11, 13                                                          |
| 13       | 111.1      | CH <sub>2</sub> | H <sub><math>\alpha</math></sub> : 4.87, s<br>H <sub><math>\beta</math></sub> : 4.78, s                     |                  | 6 $\alpha$ , 6 $\beta$<br>12            | 7, 11, 12<br>7, 12                                                 |
| 14       | 28.8       | CH <sub>3</sub> | 1.17, s                                                                                                     |                  | 1 $\alpha$ , 1 $\beta$ , 5, 6 $\alpha$  | 1, 9, 10, 2 <sub>w</sub>                                           |
| 15       | 30.0       | CH <sub>3</sub> | 1.18, s                                                                                                     |                  | 3 $\alpha$ , 3 $\beta$ , 5, 6 $\beta$   | 3, 4, 5, 2 <sub>w</sub>                                            |
| 8-OH     |            |                 | 4.75, d (3.6)                                                                                               | 8                | 9 $\alpha$                              | 7, 8, 9                                                            |

**Table S3.** NMR Spectroscopic Data for **3** (DMSO-*d*<sub>6</sub>)

| Position | $\delta_C$ |                 | $\delta_H$ ( <i>J</i> in Hz)                                                                                            | COSY                                             | NOESY                                   | HMBC                               |
|----------|------------|-----------------|-------------------------------------------------------------------------------------------------------------------------|--------------------------------------------------|-----------------------------------------|------------------------------------|
| 1        | 31.0       | CH <sub>2</sub> | H <sub><math>\alpha</math></sub> : 1.30 (m)<br>H <sub><math>\beta</math></sub> : 2.24, td (5.4, 13.8)                   | 2 $\alpha$ , 2 $\beta$<br>2 $\alpha$ , 2 $\beta$ | 2 $\beta$ , 6 $\beta$ , 8 $\beta$       | 2, 10, 14                          |
| 2        | 37.4       | CH <sub>2</sub> | H <sub><math>\alpha</math></sub> : 2.57, td (7.2, 14.4)<br>H <sub><math>\beta</math></sub> : 2.04, ddd (4.8, 4.8, 14.4) | 1 $\alpha$ , 1 $\beta$<br>1 $\alpha$ , 1 $\beta$ | 4, 14<br>1 $\alpha$ , 1 $\beta$         | 1, 3<br>1, 3, 4, 10                |
| 3        | 212.3      | C               |                                                                                                                         |                                                  |                                         |                                    |
| 4        | 42.4       | CH              | 2.92, p (6.0)                                                                                                           | 5, 15                                            | 2 $\alpha$ , 5, 14                      | 3, 5, 6, 10, 15                    |
| 5        | 48.1       | CH              | 1.55, m                                                                                                                 | 4, 6 $\alpha$ , 6 $\beta$                        | 4, 13 $\beta$ , 14, 15                  | 6, 10                              |
| 6        | 33.1       | CH <sub>2</sub> | H <sub><math>\alpha</math></sub> : 1.83, m<br>H <sub><math>\beta</math></sub> : 0.81, t (13.8)                          | 5, 15<br>5                                       | 7-OH<br>1 $\beta$ , 8 $\beta$ , 7-OH    | 5, 7, 8, 10, 11                    |
| 7        | 72.2       | C               |                                                                                                                         |                                                  |                                         |                                    |
| 8        | 31.4       | CH <sub>2</sub> | H <sub><math>\alpha</math></sub> : 1.82, m<br>H <sub><math>\beta</math></sub> : 1.50, td (13.8, 4.8)                    | 9 $\alpha$ , 9 $\beta$<br>9 $\alpha$ , 9 $\beta$ | 1 $\beta$ , 6 $\beta$ , 7-OH            | 6, 7, 9, 10, 11                    |
| 9        | 36.8       | CH <sub>2</sub> | H <sub><math>\alpha</math></sub> : 1.29, m<br>H <sub><math>\beta</math></sub> : 1.33, m                                 | 8 $\alpha$ , 8 $\beta$<br>8 $\alpha$ , 8 $\beta$ | 13 $\beta$                              | 1, 5, 7, 10, 14<br>1, 5, 7, 10, 14 |
| 10       | 33.0       | C               |                                                                                                                         |                                                  |                                         |                                    |
| 11       | 146.4      | C               |                                                                                                                         |                                                  |                                         |                                    |
| 12       | 18.5       | CH <sub>3</sub> | 1.66, s                                                                                                                 |                                                  | 13 $\alpha$ , 7-OH                      | 7, 11, 13                          |
| 13       | 112.1      | CH <sub>2</sub> | H <sub><math>\alpha</math></sub> : 4.92, s<br>H <sub><math>\beta</math></sub> : 4.85, s                                 |                                                  | 12<br>5, 9 $\alpha$                     | 7, 11, 12<br>7, 11, 12             |
| 14       | 26.9       | CH <sub>3</sub> | 1.19, s                                                                                                                 |                                                  | 2 $\alpha$ , 4, 5                       | 1, 5, 9, 10                        |
| 15       | 11.4       | CH <sub>3</sub> | 0.83, d (6.6)                                                                                                           | 4                                                | 5                                       | 3, 4, 5                            |
| 7-OH     |            |                 | 4.47, s                                                                                                                 |                                                  | 6 $\alpha$ , 6 $\beta$ , 8 $\beta$ , 12 | 6, 7, 8, 11                        |

**Table S4.** NMR Spectroscopic Data for **4** (DMSO-*d*<sub>6</sub>)

| Position | $\delta_C$ |                 | $\delta_H$ ( <i>J</i> in Hz)                                       | COSY                                       | NOESY                                | HMBC                      |
|----------|------------|-----------------|--------------------------------------------------------------------|--------------------------------------------|--------------------------------------|---------------------------|
| 1        | 38.7       | CH              | 2.69, dt (4.2, 13.2)                                               | 2 $\alpha$ , 2 $\beta$ , 10                | 2 $\alpha$ , 3 $\alpha$ , 9 $\alpha$ | 2, 3, 5, 6, 7, 10, 14     |
| 2        | 26.7       | CH <sub>2</sub> | H $\alpha$ : 1.74 (m)<br>H $\beta$ : 1.48, dq (4.8, 13.2)          | 1, 3 $\alpha$<br>1, 3 $\alpha$ , 3 $\beta$ | 1<br>3 $\beta$ , 14                  | 1, 3, 4, 6<br>1, 3, 6     |
| 3        | 25.0       | CH <sub>2</sub> | H $\alpha$ : 2.31, m<br>H $\beta$ : 2.59, m                        | 2 $\alpha$ , 2 $\beta$<br>2 $\alpha$       | 1<br>2 $\beta$                       | 1, 2, 4<br>1, 2, 4, 5, 15 |
| 4        | 138.0      | C               |                                                                    |                                            |                                      |                           |
| 5        | 131.5      | CH              | 7.63, s                                                            |                                            | 11                                   | 1, 3, 4, 6, 7, 15         |
| 6        | 144.5      | C               |                                                                    |                                            |                                      |                           |
| 7        | 140.6      | C               |                                                                    |                                            |                                      |                           |
| 8        | 198.2      | C               |                                                                    |                                            |                                      |                           |
| 9        | 47.0       | CH <sub>2</sub> | H $\alpha$ : 2.24 <sup>a</sup><br>H $\beta$ : 2.64, dd (5.4, 16.2) | 10                                         | 1<br>14                              | 7, 8<br>1, 8, 10, 14      |
| 10       | 31.6       | CH              | 2.24 <sup>a</sup>                                                  | 1, 9 $\beta$ , 10                          |                                      | 8                         |
| 11       | 26.0       | CH              | 3.16, p (7.2)                                                      | 12, 13                                     | 5                                    | 6, 7, 8, 12, 13           |
| 12       | 20.9       | CH <sub>3</sub> | 1.13, d (6.6)                                                      | 11                                         |                                      | 7, 11, 13                 |
| 13       | 21.4       | CH <sub>3</sub> | 1.17, d (6.6)                                                      | 11                                         | 14                                   | 7, 11, 12                 |
| 14       | 12.5       | CH <sub>3</sub> | 0.81, d (6.6)                                                      | 10                                         | 2 $\beta$ , 9 $\beta$ , 13           | 1, 9, 10                  |
| 15       | 167.7      | C               |                                                                    |                                            |                                      |                           |
| 15-OH    |            |                 | 12.76, br.s                                                        |                                            |                                      |                           |

<sup>a</sup> Overlapping signals

**Table S5.** NMR Spectroscopic Data for **5** (DMSO-*d*<sub>6</sub>)

| Position           | $\delta_C$ |                 | $\delta_H$ ( <i>J</i> in Hz) | COSY    | HMBC                                                        |
|--------------------|------------|-----------------|------------------------------|---------|-------------------------------------------------------------|
| 1                  | 168.0      | C               |                              |         |                                                             |
| 3                  | 110.0      | C               |                              |         |                                                             |
| 3a                 | 130.1      | C               |                              |         |                                                             |
| 4                  | 140.6      | C               |                              |         |                                                             |
| 5                  | 151.2      | C               |                              |         |                                                             |
| 6                  | 118.0      | CH              | 7.01, d (7.8)                | 7       | 1, 4, 7a, 3a <sub>w</sub> , 5 <sub>w</sub> , 7 <sub>w</sub> |
| 7                  | 116.6      | CH              | 7.16, d (7.8)                | 6       | 1, 3a, 5, 6, 4 <sub>w</sub>                                 |
| 7a                 | 119.5      | C               |                              |         |                                                             |
| 8                  | 67.3       | CH              | 4.26, q (6.6)                | 9, 8-OH | 3a <sup>b</sup>                                             |
| 9                  | 17.1       | CH <sub>3</sub> | 1.12, d (6.6)                | 8       | 3, 8                                                        |
| 3-OCH <sub>3</sub> | 50.8       | CH <sub>3</sub> | 2.97, s                      |         | 3                                                           |
| 4-OH               |            |                 | 9.39, s                      |         | 3a, 4, 5                                                    |
| 5-OH               |            |                 | 10.51, s                     |         | 4, 5, 6                                                     |
| 8-OH               |            |                 | 5.63, br.s                   | 8       | <sup>a</sup>                                                |

<sup>a</sup> Not observed<sup>b</sup> Observed when HMBC experiment was performed with <sup>n</sup>*J*<sub>CH</sub> = 3 Hz**Table S6.** Comparison of Experimental and Calculated <sup>13</sup>C and <sup>1</sup>H NMR Chemical Shifts in DMSO-*d*<sub>6</sub> for (3*R*, 8*R*)-**5** and (3*R*, 8*S*)-**5**

| Position           | $\delta_C$ (exp.) | (3 <i>R</i> , 8 <i>R</i> )- <b>5</b> |                                 | (3 <i>R</i> , 8 <i>S</i> )- <b>5</b> |                                 |                                 |
|--------------------|-------------------|--------------------------------------|---------------------------------|--------------------------------------|---------------------------------|---------------------------------|
|                    |                   | $\delta_C$ <sup>a</sup> (calc.)      | $\delta_C$ <sup>a</sup> (calc.) | $\delta_H$ (exp.)                    | $\delta_H$ <sup>a</sup> (calc.) | $\delta_H$ <sup>a</sup> (calc.) |
| 1                  | 168.0             | 168.2                                | 168.7                           |                                      |                                 |                                 |
| 3                  | 110.0             | 108.8                                | 106.6                           |                                      |                                 |                                 |
| 3a                 | 130.1             | 127.3                                | 130.4                           |                                      |                                 |                                 |
| 4                  | 140.6             | 139.0                                | 139.0                           |                                      |                                 |                                 |
| 5                  | 151.2             | 152.7                                | 152.7                           |                                      |                                 |                                 |
| 6                  | 117.8             | 116.7                                | 116.2                           | 7.01                                 | 6.94                            | 7.05                            |
| 7                  | 116.3             | 119.1                                | 118.4                           | 7.16                                 | 7.19                            | 7.32                            |
| 7a                 | 119.4             | 118.4                                | 117.3                           |                                      |                                 |                                 |
| 8                  | 67.1              | 74.4                                 | 75.7                            | 4.26                                 | 4.26                            | 3.93                            |
| 9                  | 16.9              | 13.8                                 | 15.0                            | 1.12                                 | 1.04                            | 1.33                            |
| 3-OCH <sub>3</sub> | 50.6              | 49.6                                 | 48.0                            | 2.97                                 | 3.08                            | 2.90                            |
| MAE                |                   | 2.1                                  | 2.4                             |                                      | 0.06                            | 0.16                            |
| DP4                |                   | <b>86.5 %</b>                        | 13.5 %                          |                                      | <b>97.00 %</b>                  | 3.00 %                          |

<sup>a</sup> Values obtained after systematic errors were removed.

**Table S7.** NMR Spectroscopic Data for **6** (DMSO-*d*<sub>6</sub>)

| Position | $\delta_C$ |                 | $\delta_H$ ( <i>J</i> in Hz)                                          | COSY                             | NOESY                              | HMBC                                                     |
|----------|------------|-----------------|-----------------------------------------------------------------------|----------------------------------|------------------------------------|----------------------------------------------------------|
| 2        | 153.5      | C               |                                                                       |                                  |                                    |                                                          |
| 3        | 102.0      | CH              | 6.27, s                                                               |                                  |                                    | 2, 3a, 7a                                                |
| 3a       | 119.9      | C               |                                                                       |                                  |                                    |                                                          |
| 4        | 192.1      | C               |                                                                       |                                  |                                    |                                                          |
| 5        | 77.1       | CH              | 3.89, dd (4.8, 7.8)                                                   | 6, 5-OH                          | 7 $\beta$                          | 4, 6, 7                                                  |
| 6        | 70.7       | CH              | 3.95, m                                                               | 5, 7 $\alpha$ , 7 $\beta$ , 6-OH | 7 $\alpha$ , 7 $\beta$             | 5, 7a                                                    |
| 7        | 30.4       | CH <sub>2</sub> | H $\alpha$ : 3.15, dd (4.8, 16.8)<br>H $\beta$ : 2.80, dd (7.8, 16.8) | 6, 7 $\beta$<br>6, 7 $\alpha$    | 7 $\beta$ , 6<br>7 $\alpha$ , 5, 6 | 3a, 5, 6, 7a<br>3a, 5, 6, 7a, 3 <sup>a</sup>             |
| 7a       | 162.4      | C               |                                                                       |                                  |                                    |                                                          |
| 8        | 13.1       | CH <sub>3</sub> | 2.27, s                                                               |                                  |                                    | 2, 3, 3a <sup>a</sup> , 7a <sup>a</sup> , 4 <sup>a</sup> |
| 5-OH     |            |                 | 5.50, d (4.2)                                                         | 5                                |                                    | 4, 5, 6                                                  |
| 6-OH     |            |                 | 5.44, d (4.2)                                                         | 6                                |                                    | 5, 6, 7                                                  |

<sup>a</sup> Observed when HMBC experiment was performed with  ${}^nJ_{CH} = 2$  Hz

**Table S8.** NMR Spectroscopic Data for **7** (DMSO-*d*<sub>6</sub>)

| Position | $\delta_C$ |                 | $\delta_H$ ( <i>J</i> in Hz)                | COSY                                            | ROESY         | HMBC                                             |
|----------|------------|-----------------|---------------------------------------------|-------------------------------------------------|---------------|--------------------------------------------------|
| 2        | 158.2      | C               |                                             |                                                 |               |                                                  |
| 3        | 108.1      | CH              | 6.39, s                                     |                                                 | 8, 9 $\alpha$ | 2, 3a, 7a                                        |
| 3a       | 143.1      | C               |                                             |                                                 |               |                                                  |
| 4        | 36.4       | CH              | 2.91, m                                     | 5 $\alpha$ , 5 $\beta$ , 9 $\alpha$ , 9 $\beta$ | 5 $\alpha$    | 5, 3a, 9                                         |
| 5        | 26.7       | CH <sub>2</sub> | H $\alpha$ : 2.10, m<br>H $\beta$ : 1.82, m | 4, 6<br>4, 6                                    | 4             | 3a, 4, 6, 7, 9, 3 <sup>a</sup><br>3a, 4, 6, 7, 9 |
| 6        | 36.2       | CH <sub>2</sub> | 2.43, m                                     | 5 $\alpha$ , 5 $\beta$                          |               | 4, 5, 7, 7a                                      |
| 7        | 184.2      | C               |                                             |                                                 |               |                                                  |
| 7a       | 145.9      | C               |                                             |                                                 |               |                                                  |
| 8        | 13.7       | CH <sub>3</sub> | 2.34, s                                     |                                                 | 3             | 2, 3, 3a <sup>a</sup> , 7a <sup>a</sup>          |
| 9        | 63.2       | CH <sub>2</sub> | H $\alpha$ : 3.64, m<br>H $\beta$ : 3.52, m | 4, 9-OH<br>4, 9-OH                              | 3             | 3a, 4, 5<br>3a, 4, 5                             |
| 9-OH     |            |                 | 4.87, t (5.4)                               | 9                                               |               | 4, 9                                             |

<sup>a</sup> Observed when HMBC experiment was performed with  ${}^nJ_{CH} = 3$  Hz

**Table S9.** NMR Spectroscopic Data for **8** (DMSO-*d*<sub>6</sub>)

| Position | $\delta_C$ |                 | $\delta_H$ ( <i>J</i> in Hz) | HMBC                        |
|----------|------------|-----------------|------------------------------|-----------------------------|
| 2        | 157.0      | C               |                              |                             |
| 3        | 101.8      | CH              | 6.98, s                      | 2, 3a, 7a                   |
| 3a       | 120.2      | C               |                              |                             |
| 4        | 127.7      | C               |                              |                             |
| 5        | 115.3      | CH              | 7.25, s                      | 3a, 6, 7, 9, 3 <sup>b</sup> |
| 6        | 154.6      | C               |                              |                             |
| 7        | 103.6      | CH              | 7.21, s                      | 3a, 5, 6, 7a                |
| 7a       | 155.7      | C               |                              |                             |
| 8        | 13.8       | CH <sub>3</sub> | 2.44, s                      | 2, 3, 3a <sub>w</sub>       |
| 9        | 192.4      | C               | 10.07, s                     | 3a, 4, 5, 7a <sub>w</sub>   |
| 6-OH     |            |                 | <sup>a</sup>                 |                             |

<sup>a</sup> Not observed<sup>b</sup> Observed when HMBC experiment was performed with <sup>n</sup>*J*<sub>CH</sub> = 2 Hz**Table S10.** NMR Spectroscopic Data for **9** (DMSO-*d*<sub>6</sub>)

| Position | $\delta_C$ |                 | $\delta_H$ ( <i>J</i> in Hz) | HMBC                      |
|----------|------------|-----------------|------------------------------|---------------------------|
| 2        | 157.9      | C               |                              |                           |
| 3        | 103.1      | CH              | 7.05, s                      | 2, 3a, 7a                 |
| 3a       | 129.6      | C               |                              |                           |
| 4        | 119.1      | C               |                              |                           |
| 5        | 131.8      | CH              | 7.55, d (8.4)                | 3a, 7, 9, 3a <sub>w</sub> |
| 6        | 110.4      | CH              | 6.73, d (7.8)                | 4, 7a, 7 <sub>w</sub>     |
| 7        | 150.5      | C               |                              |                           |
| 7a       | 143.5      | C               |                              |                           |
| 8        | 13.8       | CH <sub>3</sub> | 2.47, s                      | 2, 3, 3a <sub>w</sub>     |
| 9        | 189.7      | C               | 9.83, s                      | 3a, 4, 5, 7a <sub>w</sub> |
| 7-OH     |            |                 | <sup>a</sup>                 |                           |

<sup>a</sup> Not observed



**Table S11.** NMR Spectroscopic Data for **10** (DMSO-*d*<sub>6</sub>)

| Position | $\delta_C$ |                 | $\delta_H$ ( <i>J</i> in Hz)          | COSY                                            | HMBC                 |
|----------|------------|-----------------|---------------------------------------|-------------------------------------------------|----------------------|
| 1        | 127.4      | C               |                                       |                                                 |                      |
| 2        | 152.8      | C               |                                       |                                                 |                      |
| 3        | 34.6       | CH <sub>2</sub> | H <sub>β</sub> : 2.82, dd (3.6, 17.4) | 4                                               | 1, 2, 4, 5           |
|          |            |                 | H <sub>α</sub> : 2.50 <sup>a</sup>    | 4                                               | 1, 2, 4, 5           |
| 4        | 64.3       | CH              | 4.09, m                               | 3 $\alpha$ , 3 $\beta$ , 5 $\alpha$ , 5 $\beta$ | <sup>a</sup>         |
| 5        | 46.1       | CH <sub>2</sub> | H <sub>β</sub> : 2.60, dd (3.0, 15.6) | 4                                               | 3, 4, 6              |
|          |            |                 | H <sub>α</sub> : 2.39, dd (7.2, 15.6) | 4                                               | 3, 4, 6              |
| 6        | 196.8      | C               |                                       |                                                 |                      |
| 7        | 55.5       | CH <sub>2</sub> | H <sub>α</sub> : 4.82, d (11.4)       |                                                 | 1, 2, 6, 1'          |
|          |            |                 | H <sub>β</sub> : 4.79, d (11.4)       |                                                 | 1, 2, 6, 1'          |
| 8        | 128.7      | CH              | 6.68, d (15.0)                        | 9                                               | 10                   |
| 9        | 137.0      | CH              | 6.44, m                               | 8, 10                                           | 2, 10                |
| 10       | 19.2       | CH <sub>3</sub> | 1.90, d (6.6)                         | 9                                               | 8, 9, 2 <sub>w</sub> |
| 1'       | 170.3      | C               |                                       |                                                 |                      |
| 2'       | 20.7       | CH <sub>3</sub> | 1.96, s                               |                                                 | 1'                   |
| 4-OH     |            |                 | <sup>b</sup>                          |                                                 |                      |

<sup>a</sup> Underneath the DMSO signals<sup>b</sup> Not observed

**Table S12.** NMR Spectroscopic Data for **11** (DMSO-*d*<sub>6</sub>)

| Position | $\delta_C$ |                 | $\delta_H$ ( <i>J</i> in Hz)                                                                                      | COSY                                                                                                                                           | HMBC                                  |
|----------|------------|-----------------|-------------------------------------------------------------------------------------------------------------------|------------------------------------------------------------------------------------------------------------------------------------------------|---------------------------------------|
| 1        | 161.7      | C               |                                                                                                                   |                                                                                                                                                |                                       |
| 2        | 111.8      | CH              | 6.11, d (9.6)                                                                                                     | 3                                                                                                                                              | 1, 4                                  |
| 3        | 149        | CH              | 7.40, d (9.0)                                                                                                     | 2                                                                                                                                              | 1, 5, 6                               |
| 4        | 113.1      | C               |                                                                                                                   |                                                                                                                                                |                                       |
| 5        | 159.2      | C               |                                                                                                                   |                                                                                                                                                |                                       |
| 6        | 36.4       | CH <sub>2</sub> | H <sub><math>\alpha</math></sub> : 2.39, dd (4.2, 14.4)<br>H <sub><math>\beta</math></sub> : 2.28, dd (8.4, 14.4) | 6 <sub><math>\beta</math></sub> , 7<br>6 <sub><math>\alpha</math></sub> , 7                                                                    | 3, 4, 5, 7, 8<br>3, 4, 5, 7, 8        |
| 7        | 71.3       | CH              | 3.42, m                                                                                                           | 6 <sub><math>\alpha</math></sub> , 6 <sub><math>\beta</math></sub> , 8 <sub><math>\alpha</math></sub> , 8 <sub><math>\beta</math></sub> , 7-OH | 4, 9                                  |
| 8        | 29.6       | CH <sub>2</sub> | H <sub><math>\alpha</math></sub> : 1.42, m<br>H <sub><math>\beta</math></sub> : 1.33, m                           | 7, 8 <sub><math>\beta</math></sub> , 9<br>7, 8 <sub><math>\alpha</math></sub> , 9                                                              | 6, 7, 9<br>6, 7, 9                    |
| 9        | 10.1       | CH <sub>3</sub> | 0.89, t (7.2, 7.8)                                                                                                | 8 <sub><math>\alpha</math></sub> , 8 <sub><math>\beta</math></sub>                                                                             | 7, 8                                  |
| 10       | 17.3       | CH <sub>3</sub> | 2.19, s                                                                                                           |                                                                                                                                                | 4, 5, 3 <sub>w</sub> , 7 <sub>w</sub> |
| 7-OH     |            |                 | 4.56, d (5.4)                                                                                                     | 7                                                                                                                                              | 6, 7, 8                               |

**Table S13.** NMR Spectroscopic Data for **12** (DMSO-*d*<sub>6</sub>)

| Position | $\delta_C$ <sup>a</sup> |                 | $\delta_H$ ( <i>J</i> in Hz)                                                            | COSY       | HMBC                     |
|----------|-------------------------|-----------------|-----------------------------------------------------------------------------------------|------------|--------------------------|
| 1        | 161.6                   | C               |                                                                                         |            |                          |
| 2        | 112.1                   | CH              | 6.13, d (9.6)                                                                           | 3          | 1, 4                     |
| 3        | 147.8                   | CH              | 7.41, d (9.0)                                                                           | 2          | 1, 5, 6                  |
| 4        | 115.1                   | C               |                                                                                         |            |                          |
| 5        | 158.3                   | C               |                                                                                         |            |                          |
| 6        | 25.0                    | CH <sub>2</sub> | H <sub><math>\alpha</math></sub> : 2.30, m<br>H <sub><math>\beta</math></sub> : 2.36, m | 7<br>7     | 3, 4, 5, 7<br>3, 4, 5, 7 |
| 7        | 38.8                    | CH <sub>2</sub> | 1.45, q (7.2)                                                                           | 6          | <sup>b</sup>             |
| 8        | 64.8                    | CH              | 3.55, m                                                                                 | 7, 9, 8-OH | <sup>b</sup>             |
| 9        | 23.6                    | CH <sub>3</sub> | 1.07, d (6.0)                                                                           | 8          | 7, 8                     |
| 10       | 16.8                    | CH <sub>3</sub> | 2.19, s                                                                                 |            | 4, 5                     |
| 8-OH     |                         |                 | 4.48, d (4.8)                                                                           | 8          | 7, 8                     |

<sup>a</sup> Determined from HSQC and HMBC spectra<sup>b</sup> Not observed

**Table S14.** Proton chemical shift differences between (*S*)-MTPA Ester of **1 (1a)** and (*R*)-MTPA Ester of **1 (1b)** in Pyridine-*d*<sub>5</sub>

| Position |                 | $\delta_{\text{H}}$ ( <b>1a</b> ) | $\delta_{\text{H}}$ ( <b>1b</b> ) | $\Delta\delta^{\text{SR}}$ |
|----------|-----------------|-----------------------------------|-----------------------------------|----------------------------|
| 1        | CH <sub>2</sub> | 1.65                              | 1.73                              | -0.08                      |
|          |                 | 1.65                              | 1.73                              | -0.08                      |
| 2        | CH              | 5.81                              | 5.83                              | -0.02                      |
| 3        | CH              | 6.00                              | 5.96                              | +0.04                      |
| 5        | CH              | 1.93                              | 2.02                              | -0.09                      |
| 6        | CH <sub>2</sub> | 2.40                              | 2.41                              | -0.01                      |
|          |                 | 2.16                              | 2.09                              | +0.07                      |
| 8        | CH              | 5.47                              | 5.54                              | -0.07                      |
| 9        | CH <sub>2</sub> | 2.33                              | 2.42                              | -0.09                      |
|          |                 | 1.33                              | 1.42                              | -0.09                      |
| 12       | CH <sub>3</sub> | 1.94                              | 1.91                              | +0.03                      |
| 13       | CH <sub>2</sub> | 5.04                              | 4.84                              | +0.20                      |
|          |                 | 5.02                              | 4.77                              | +0.25                      |
| 14       | CH <sub>3</sub> | 0.80                              | 1.11                              | -0.31                      |
| 15       | CH <sub>2</sub> | 4.62                              | 4.61                              | +0.01                      |
|          |                 | 4.19                              | 4.24                              | -0.05                      |

**Table S15.** Proton chemical shift differences between (*S*)-MTPA Ester of **2 (2a)** and (*R*)-MTPA Ester of **2 (2b)** in Pyridine-*d*<sub>5</sub>

| Position |                 | $\delta_{\text{H}}$ ( <b>2a</b> ) | $\delta_{\text{H}}$ ( <b>2b</b> ) | $\Delta\delta^{\text{SR}}$ |
|----------|-----------------|-----------------------------------|-----------------------------------|----------------------------|
| 1        | CH <sub>2</sub> | 2.25                              | 2.32                              | -0.07                      |
| 3        | CH <sub>2</sub> | 2.99                              | 3.01                              | -0.02                      |
|          |                 | 2.51                              | 2.53                              | -0.02                      |
| 5        | CH              | 1.99                              | 2.03                              | -0.04                      |
| 6        | CH <sub>2</sub> | 2.42                              | 2.44                              | -0.02                      |
|          |                 | 2.25                              | 2.18                              | +0.07                      |
| 8        | CH              | 5.39                              | 5.46                              | -0.07                      |
| 9        | CH <sub>2</sub> | 1.98                              | 2.06                              | -0.08                      |
|          |                 | 1.46                              | 1.55                              | -0.09                      |
| 12       | CH <sub>3</sub> | 1.92                              | 1.90                              | +0.02                      |
| 13       | CH <sub>2</sub> | 5.02                              | 4.84                              | +0.18                      |
|          |                 | 5.01                              | 4.78                              | +0.23                      |
| 14       | CH <sub>3</sub> | 1.23                              | 1.23                              | 0.00                       |
| 15       | CH <sub>3</sub> | 0.85                              | 1.15                              | -0.30                      |

**Table S16.** Proton chemical shift differences between (*S*)-MTPA Ester of **11** (**11a**) and (*R*)-MTPA Ester of **11** (**11b**) in Pyridine-*d*<sub>5</sub>

| Position | $\delta_{\text{H}}$ ( <b>11a</b> ) | $\delta_{\text{H}}$ ( <b>11b</b> ) | $\Delta\delta_{\text{H}}^{\text{SR}}$ |
|----------|------------------------------------|------------------------------------|---------------------------------------|
| 2        | 6.29                               | 6.18                               | +0.11                                 |
| 3        | 7.31                               | 7.18                               | +0.13                                 |
| 6        | 2.69                               | 2.58                               | +0.11                                 |
|          | 2.55                               | 2.47                               | +0.08                                 |
| 7        | 5.27                               | 5.27                               | 0.00                                  |
| 8        | 1.64                               | 1.67                               | -0.03                                 |
| 9        | 0.84                               | 0.93                               | -0.09                                 |
| 10       | 2.09                               | 1.88                               | +0.21                                 |

**Table S17.** Proton chemical shift differences between (*S*)-MTPA Ester of **12** (**12a**) and (*R*)-MTPA Ester of **12** (**12b**) in Pyridine-*d*<sub>5</sub>

| Position | $\delta_{\text{H}}$ ( <b>12a</b> ) | $\delta_{\text{H}}$ ( <b>12b</b> ) | $\Delta\delta^{\text{SR}}$ |
|----------|------------------------------------|------------------------------------|----------------------------|
| 2        | 6.28                               | 6.25                               | +0.03                      |
| 3        | 7.16                               | 7.05                               | +0.11                      |
| 6        | 2.30                               | 2.13                               | +0.17                      |
|          | 2.25                               | 2.12                               | +0.13                      |
| 7        | 1.77                               | 1.68                               | +0.09                      |
|          | 1.67                               | 1.62                               | +0.04                      |
| 8        | 5.26                               | 5.26                               | 0.00                       |
| 9        | 1.28                               | 1.35                               | -0.07                      |
| 10       | 2.04                               | 1.93                               | +0.11                      |

**Table S18.** Proton chemical shift differences between (*S*)-MTPA Ester of **13** (**13a**) and (*R*)-MTPA Ester of **13** (**13b**) in Pyridine-*d*<sub>5</sub>

| Position | $\delta_{\text{H}}$ ( <b>13a</b> ) | $\delta_{\text{H}}$ ( <b>13b</b> ) | $\Delta\delta^{\text{SR}}$ |
|----------|------------------------------------|------------------------------------|----------------------------|
| 2        | 6.43                               | 6.29                               | +0.14                      |
| 3        | 7.54                               | 7.18                               | +0.36                      |
| 6        | 6.00                               | 5.92                               | +0.08                      |
| 7        | 1.61                               | 1.63                               | -0.02                      |
|          | 1.85                               | 1.87                               | -0.02                      |
| 8        | 1.09                               | 1.26                               | -0.17                      |
|          | 1.23                               | 1.31                               | -0.08                      |
| 9        | 0.79                               | 0.85                               | -0.06                      |
| 10       | 2.36                               | 2.33                               | +0.03                      |

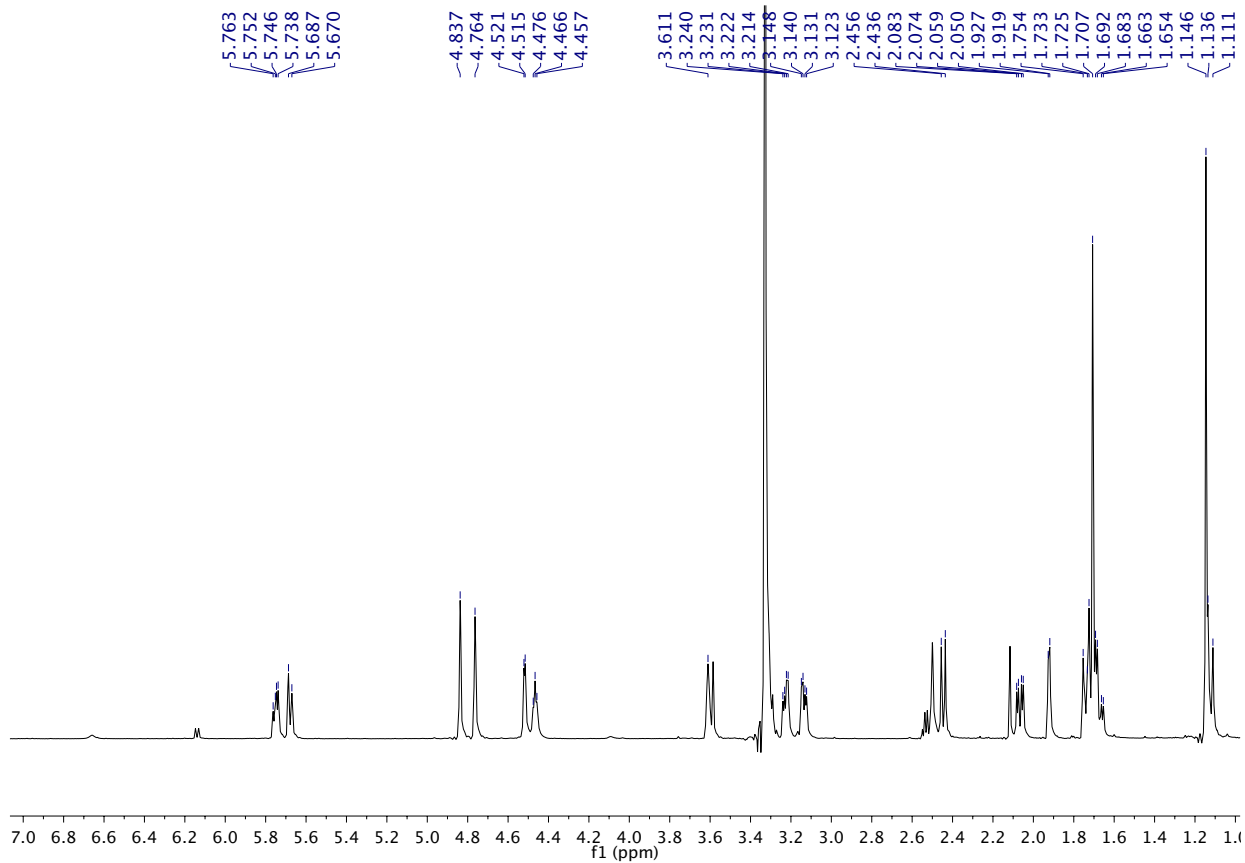

**Figure S1.**  $^1\text{H}$  Spectrum of **1** in  $\text{DMSO-}d_6$

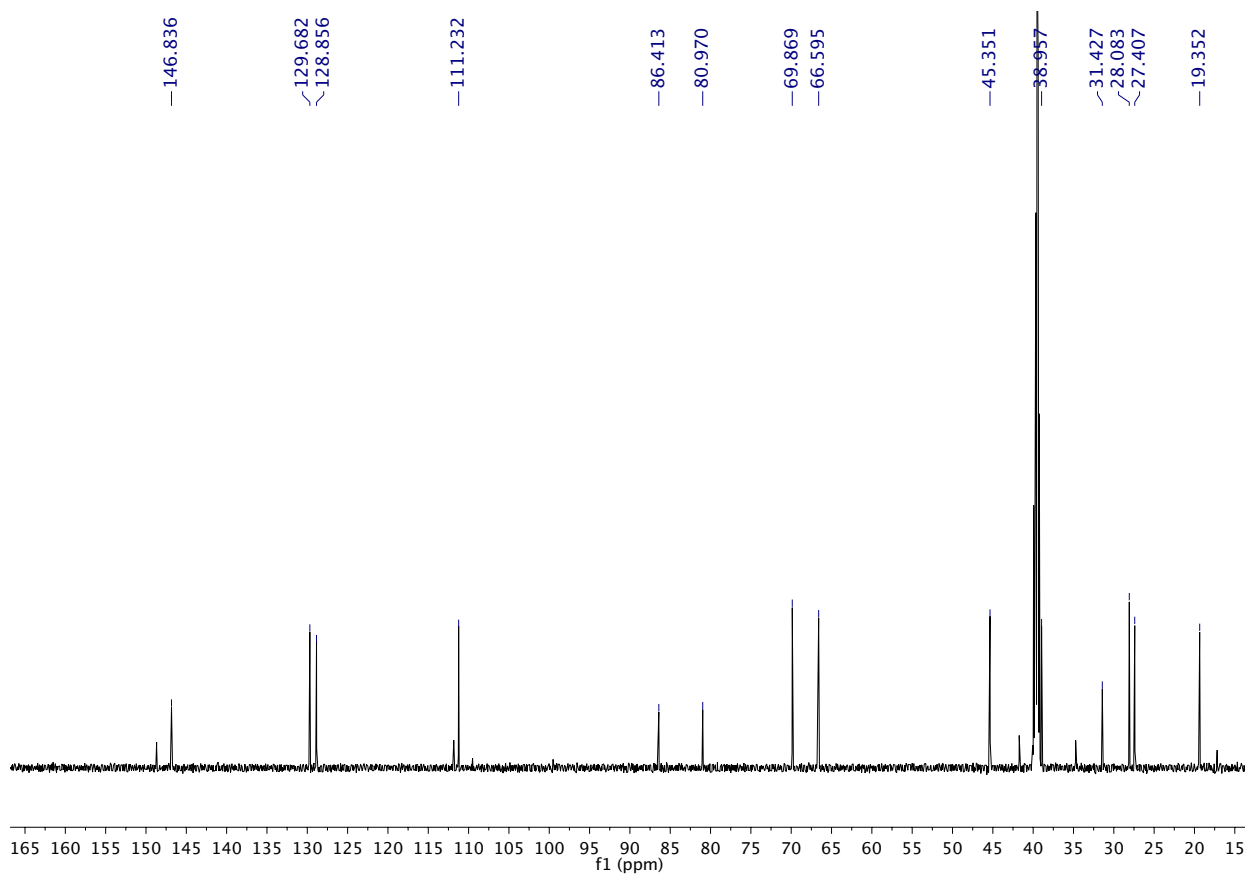

**Figure S2.**  $^{13}\text{C}$  Spectrum of **1** in  $\text{DMSO-}d_6$

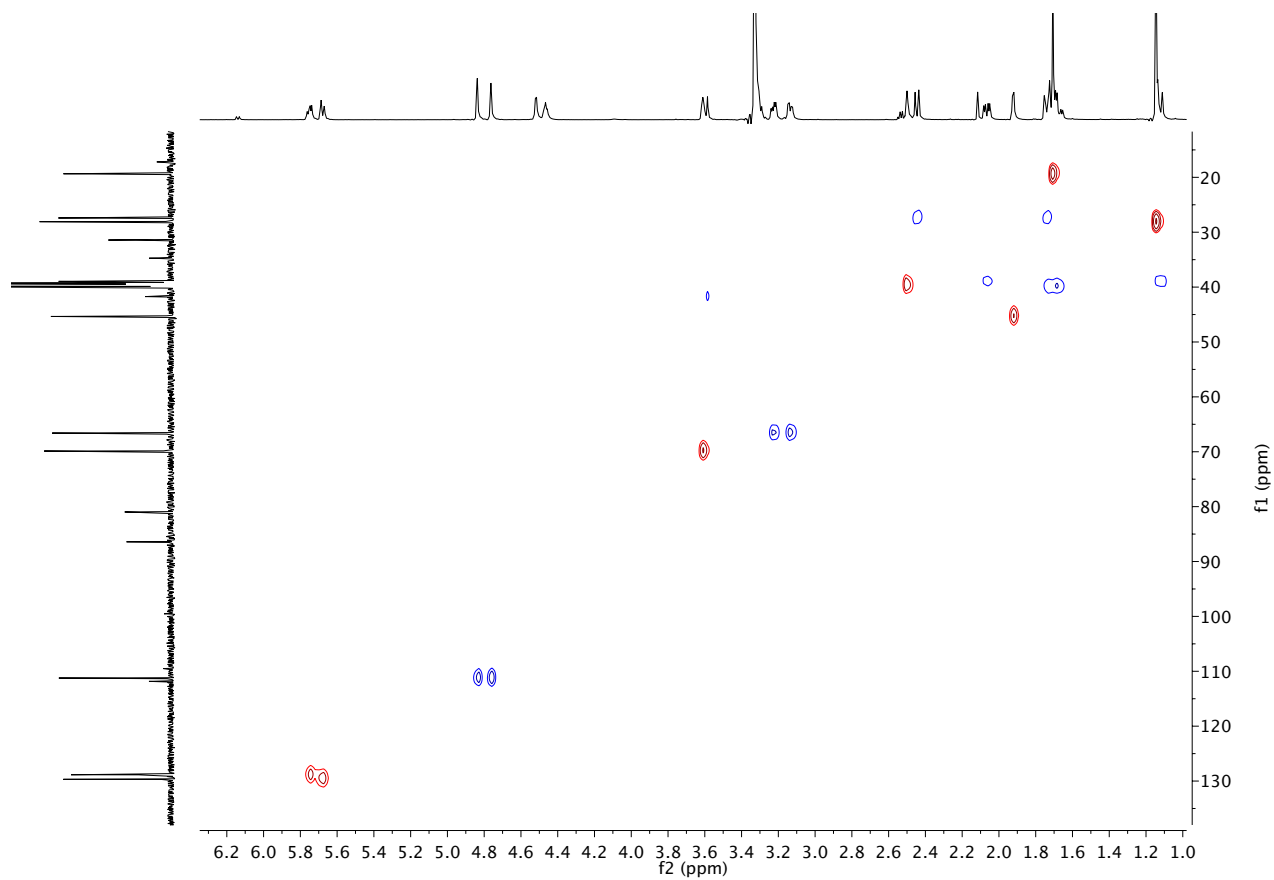

Figure S3. HSQC Spectrum of 1 in DMSO- $d_6$

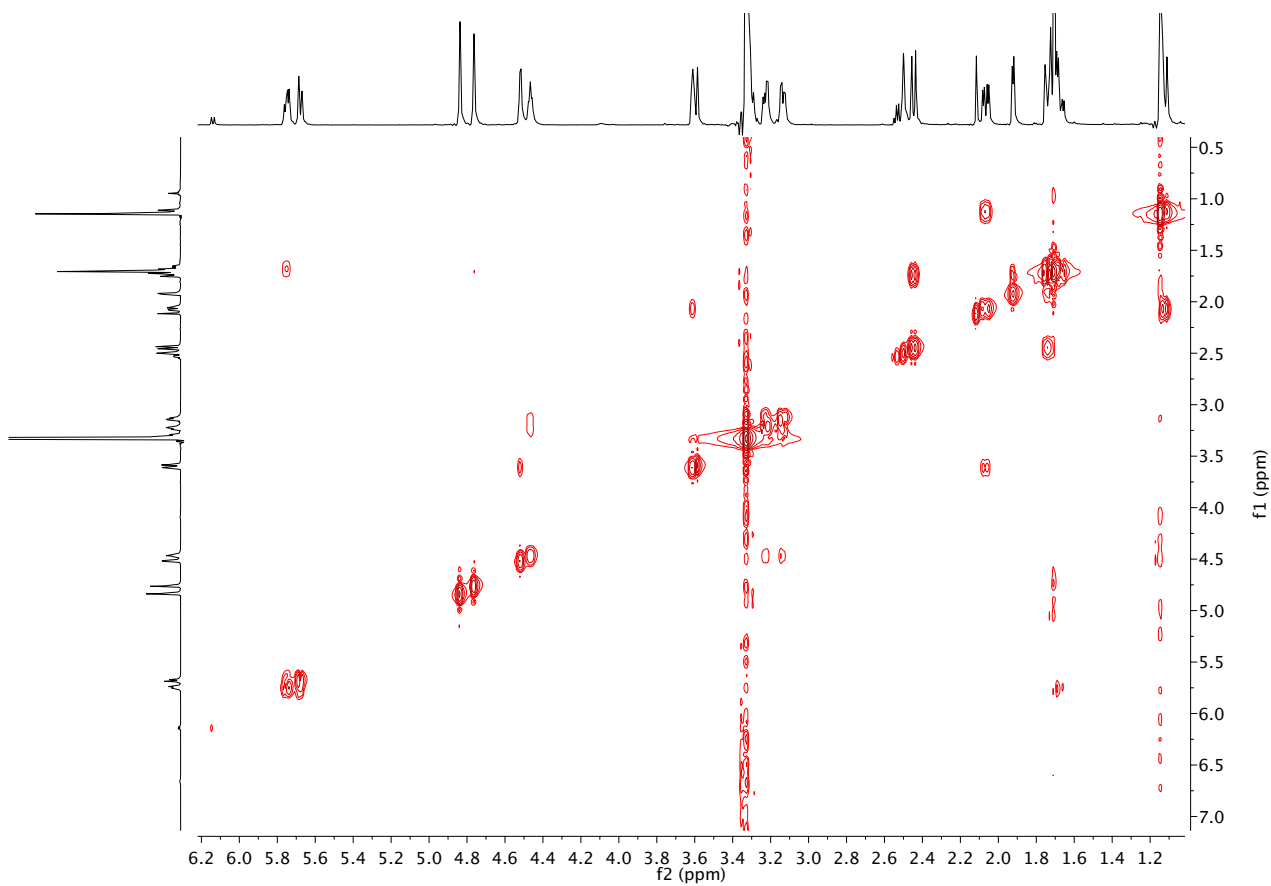

Figure S4. COSY Spectrum of 1 in DMSO- $d_6$

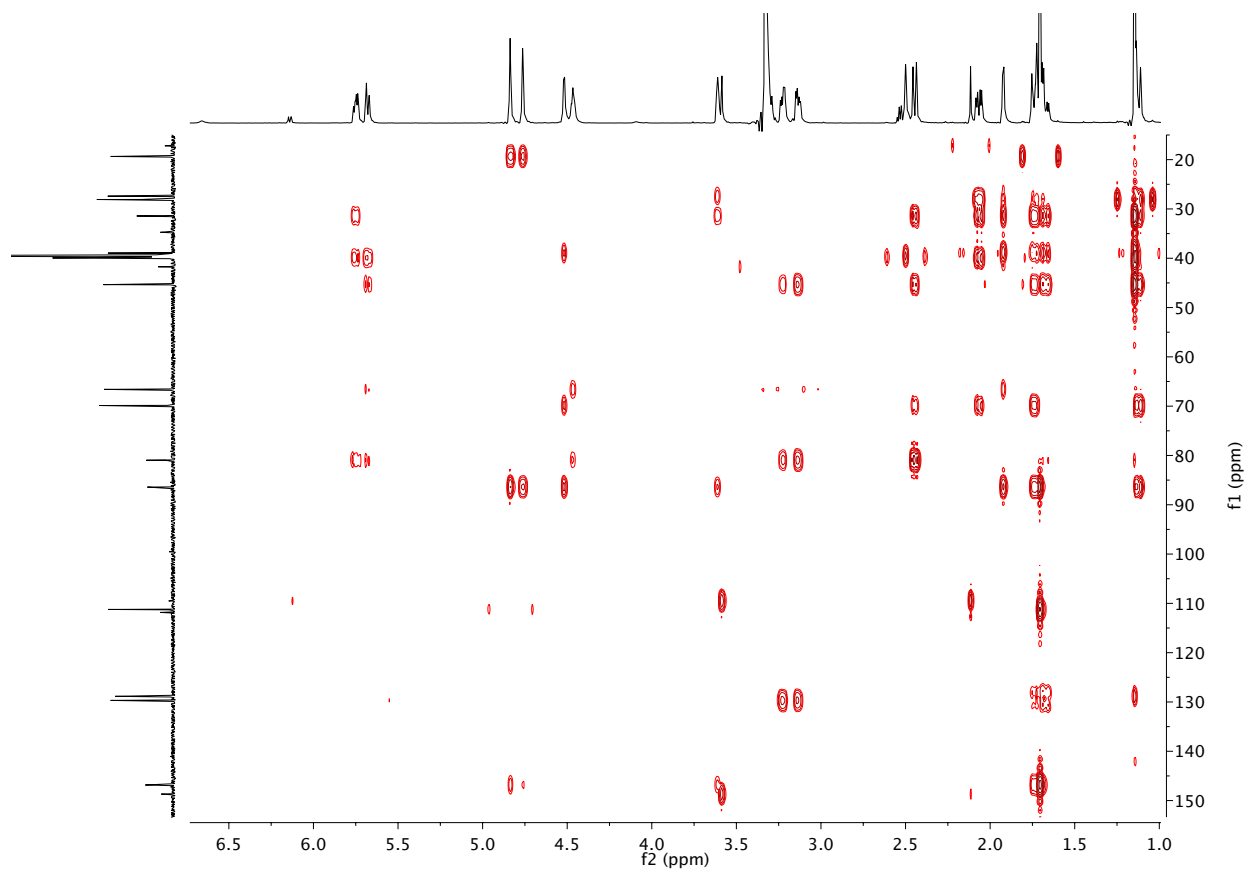

**Figure S5.** HMBC Spectrum of **1** in DMSO- $d_6$

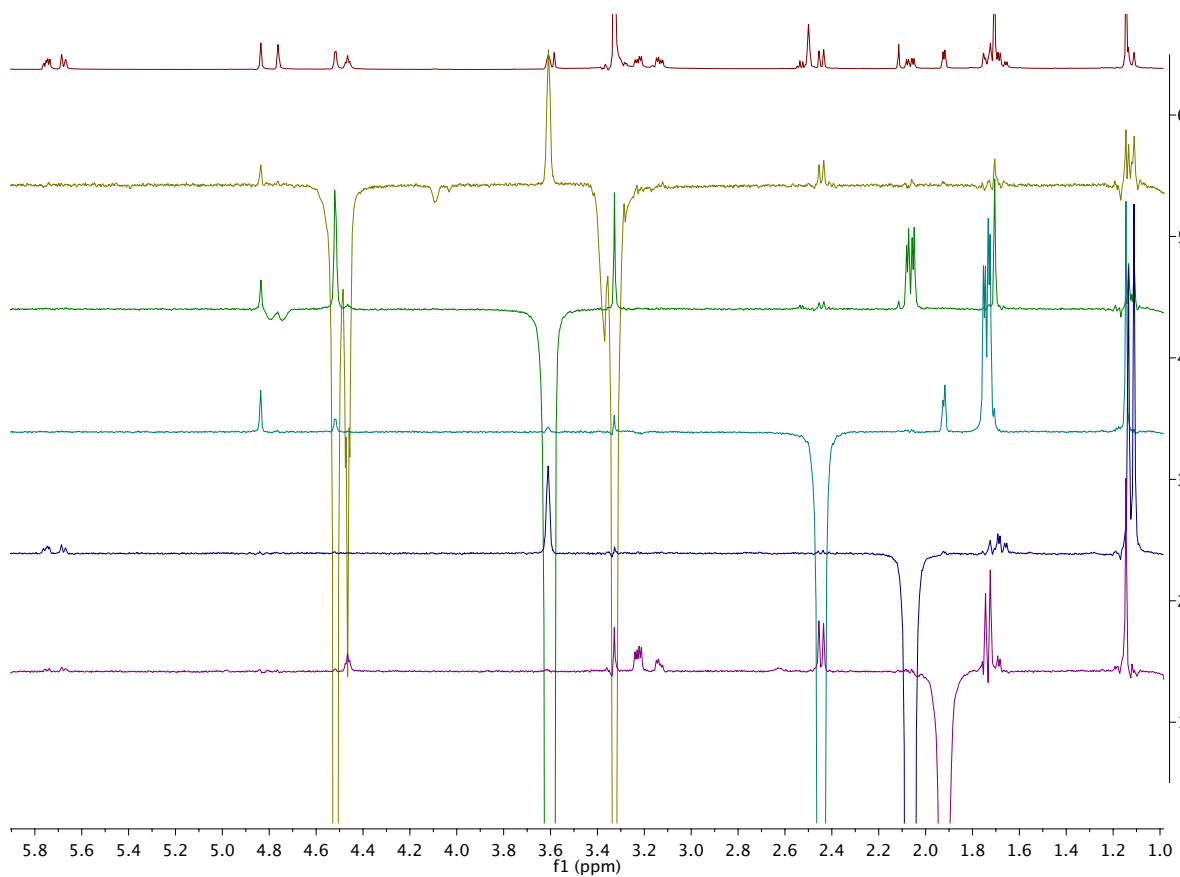

**Figure S6.** 1D NOESY Spectra of **1** in DMSO- $d_6$



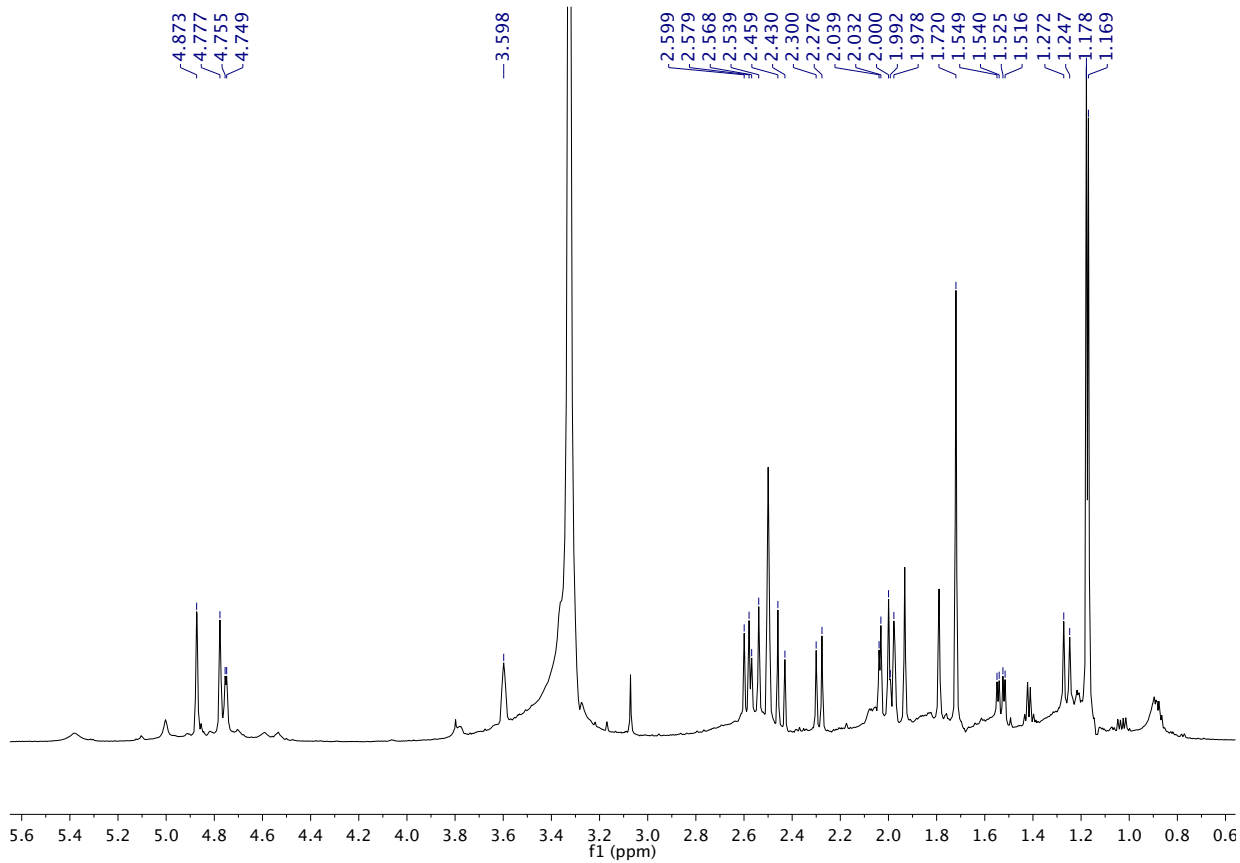

Figure S7.  $^1\text{H}$  Spectrum of **2** in  $\text{DMSO-}d_6$

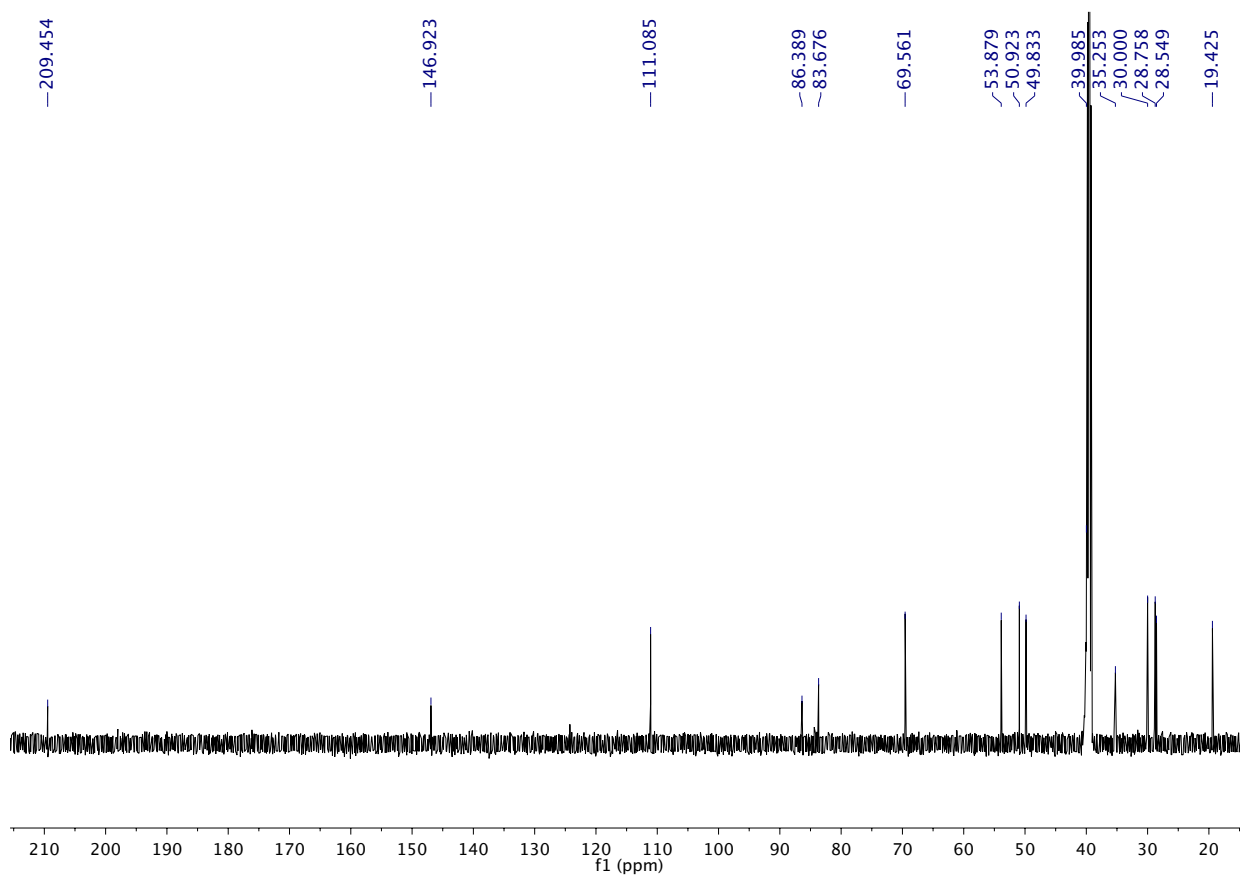

Figure S8.  $^{13}\text{C}$  Spectrum of **2** in  $\text{DMSO-}d_6$

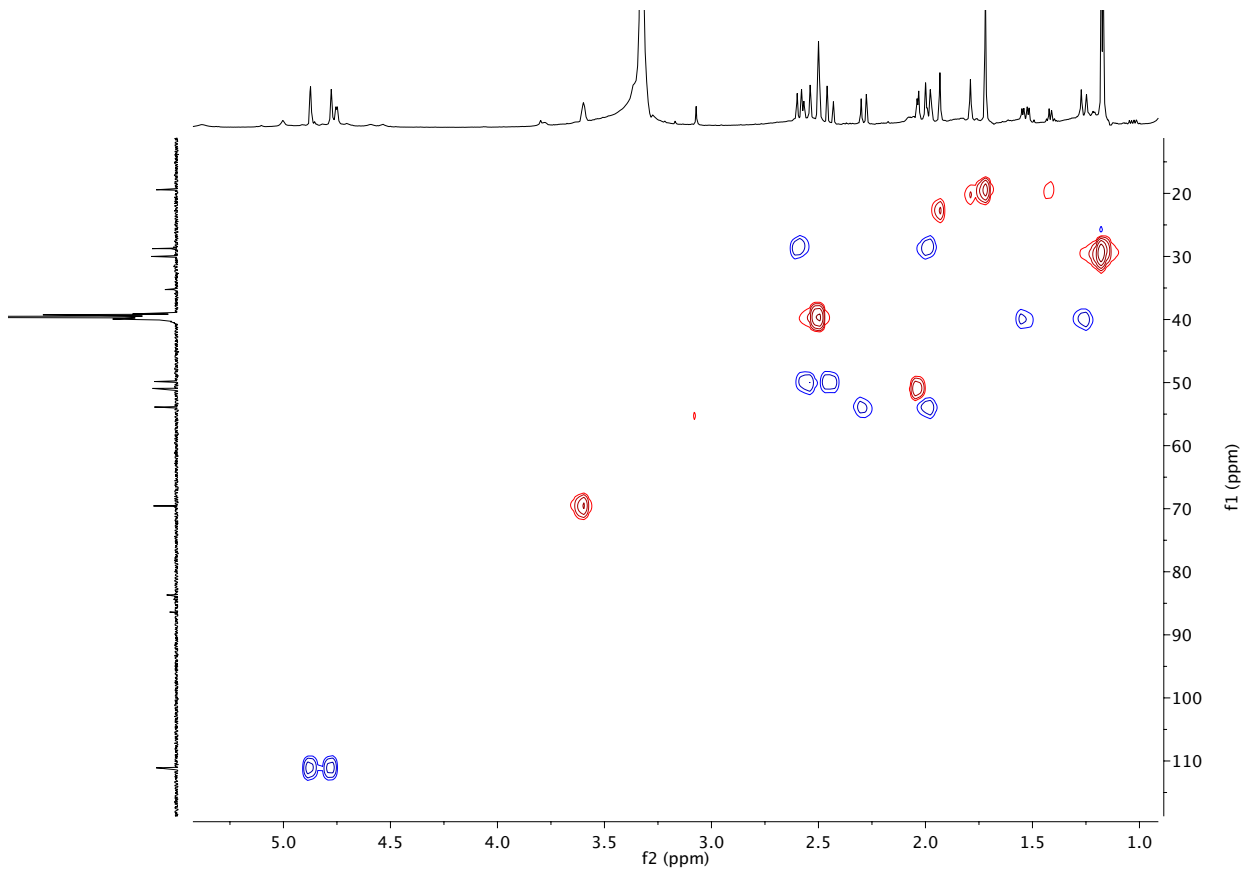

**Figure S9.** HSQC Spectrum of **2** in DMSO- $d_6$

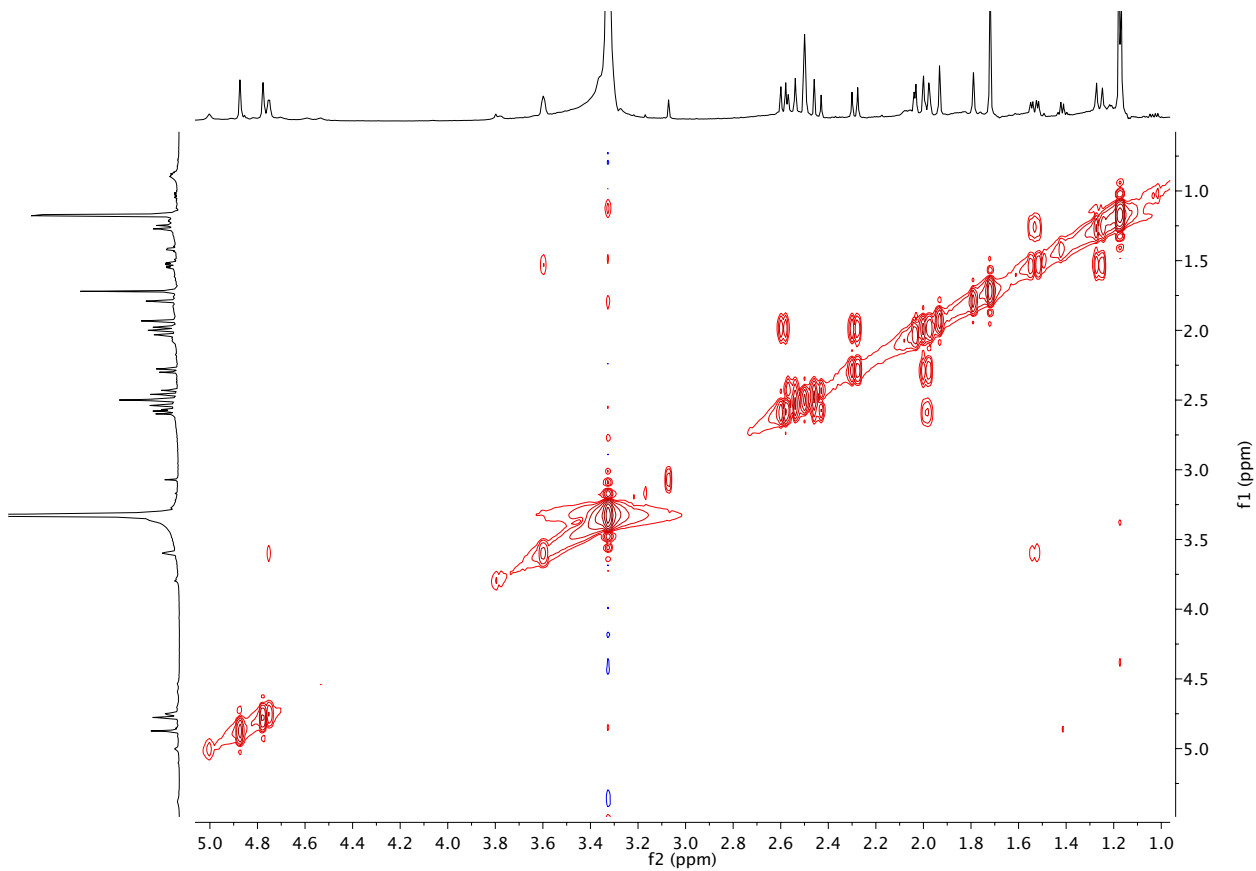

**Figure S10.** COSY Spectrum of **2** in DMSO- $d_6$

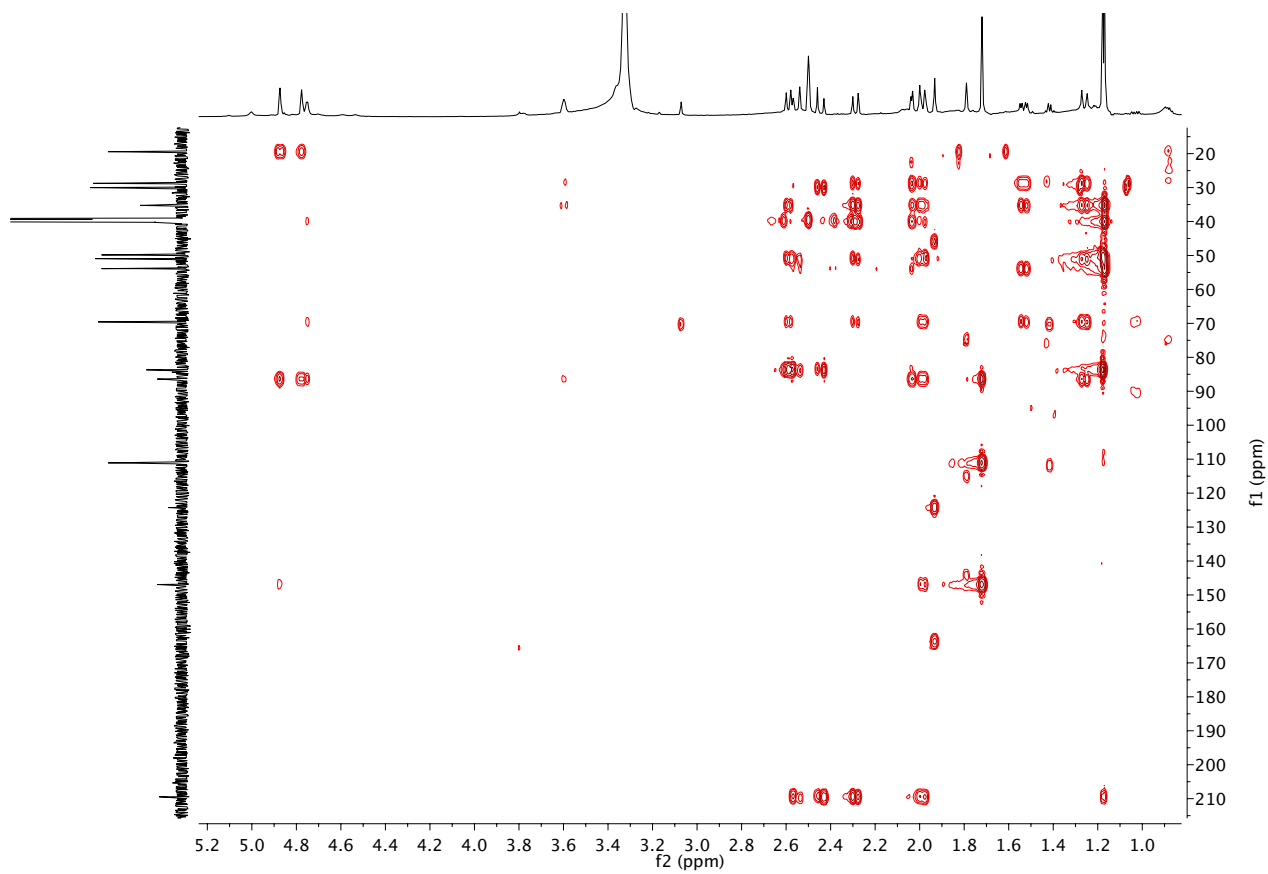

Figure S11. HMBC Spectrum of **2** in DMSO- $d_6$

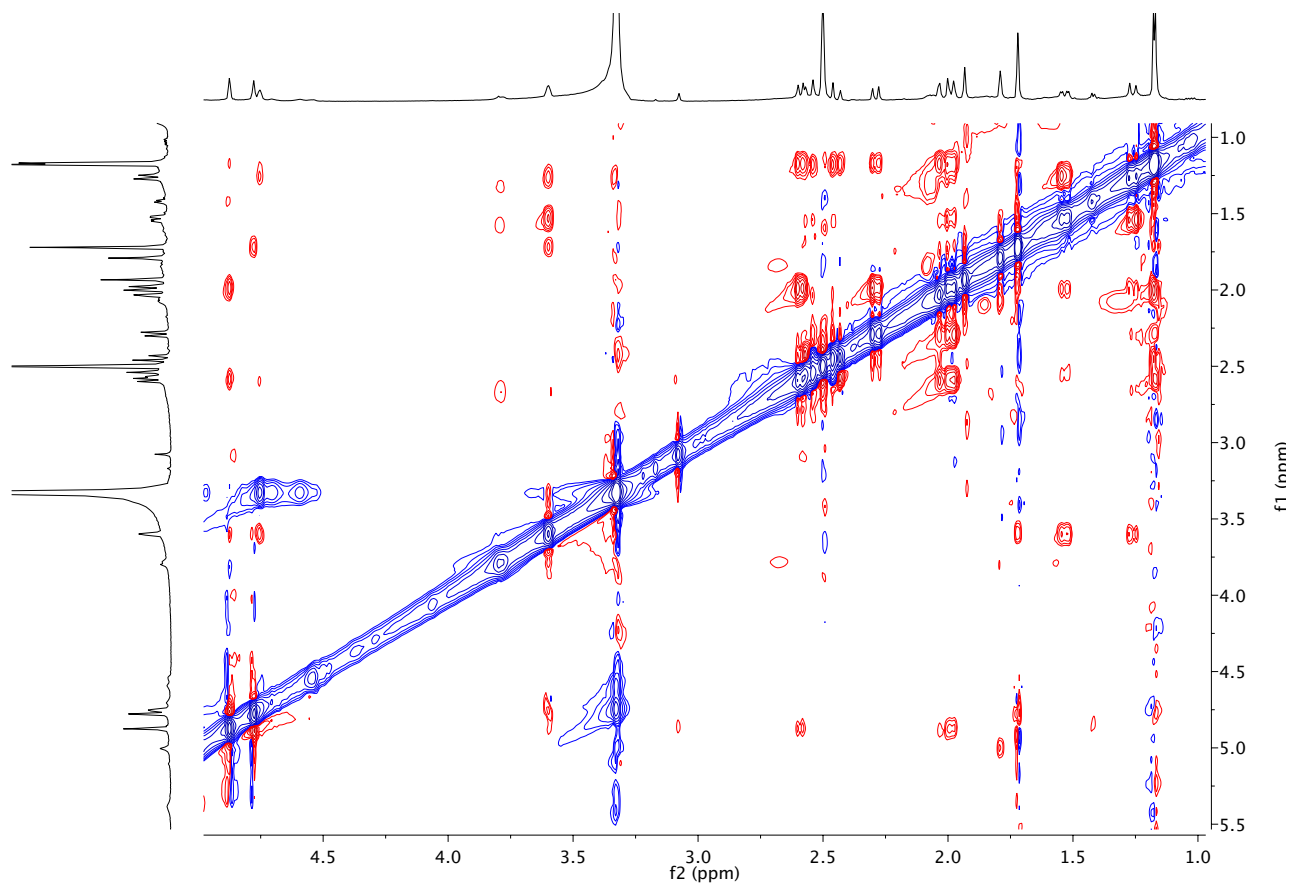

Figure S12. 2D ROESY Spectra of **2** in DMSO- $d_6$

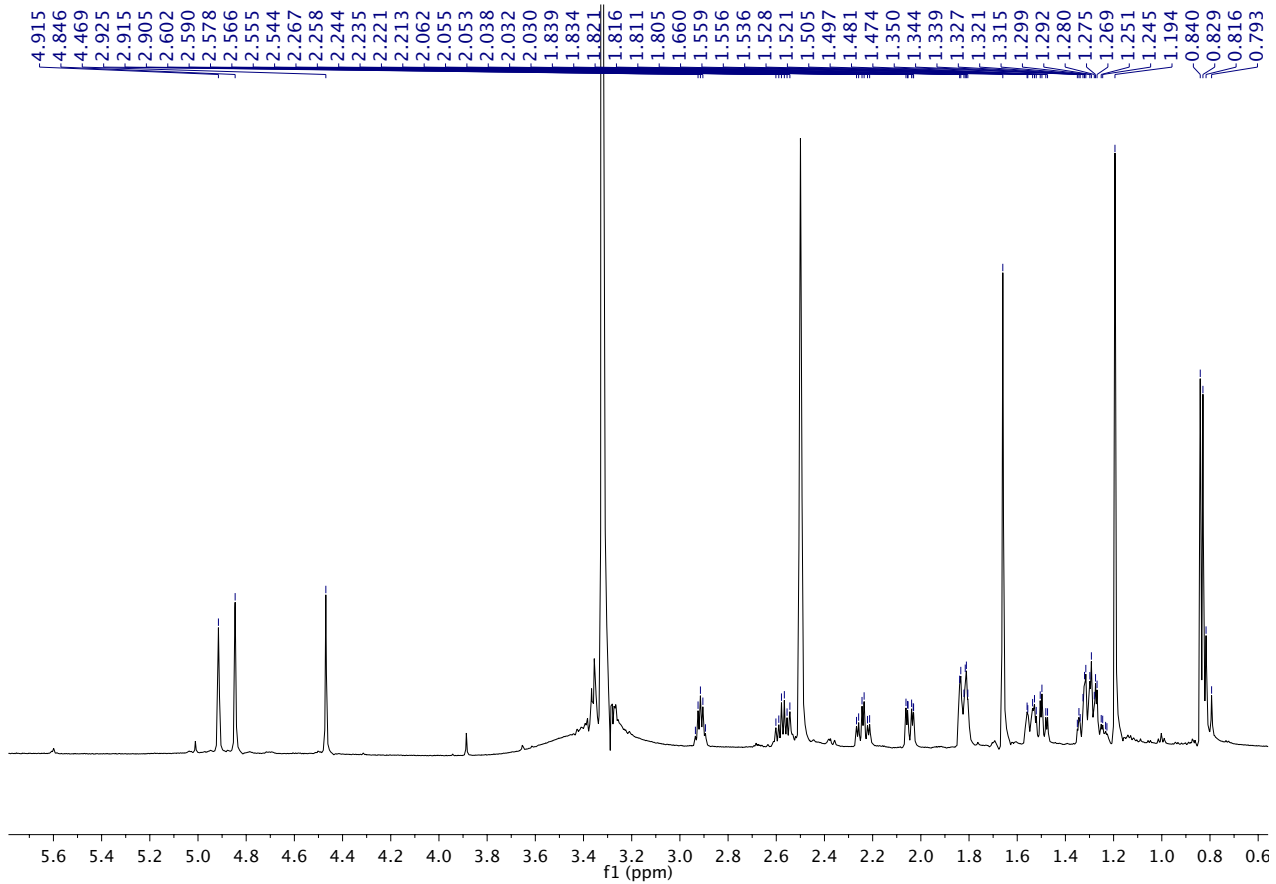

**Figure S13.**  $^1\text{H}$  Spectrum of **3** in  $\text{DMSO-}d_6$

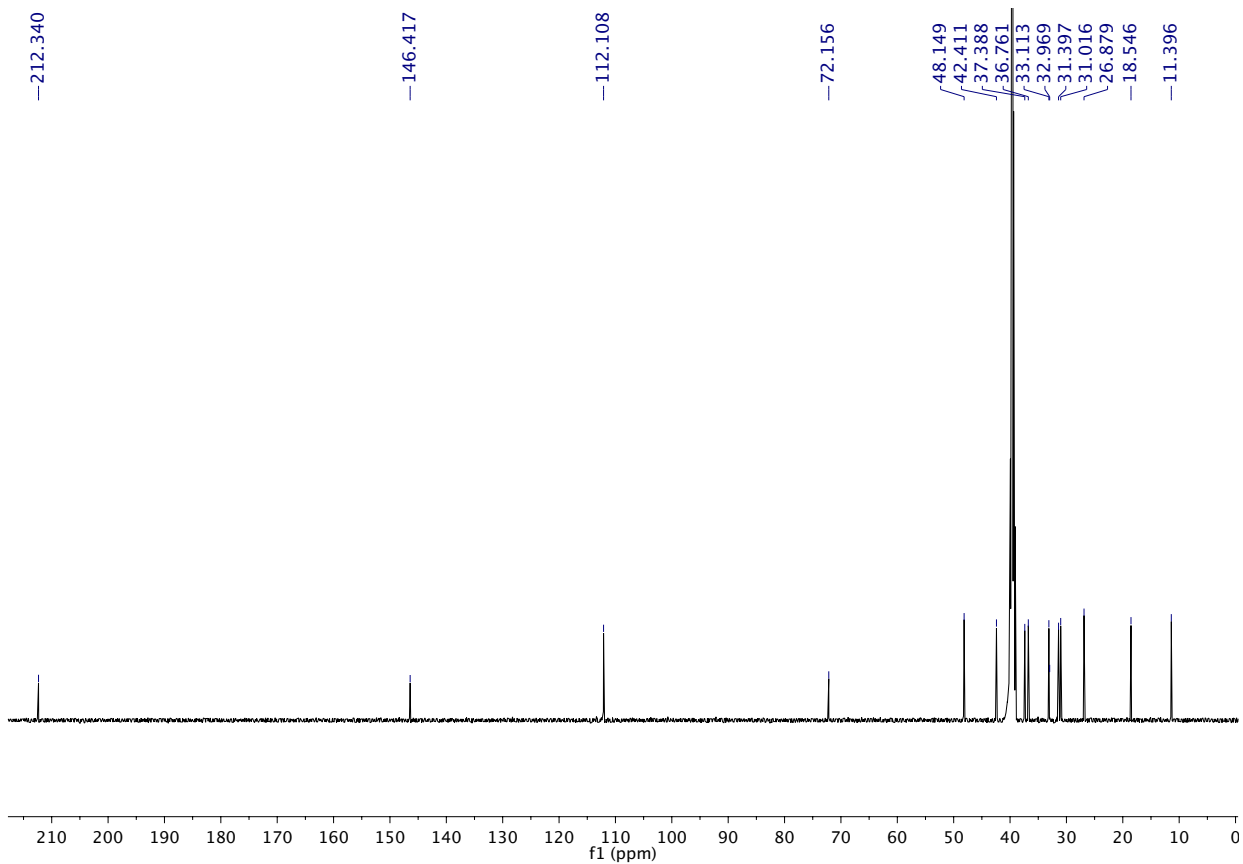

**Figure S14.**  $^{13}\text{C}$  Spectrum of **3** in  $\text{DMSO-}d_6$

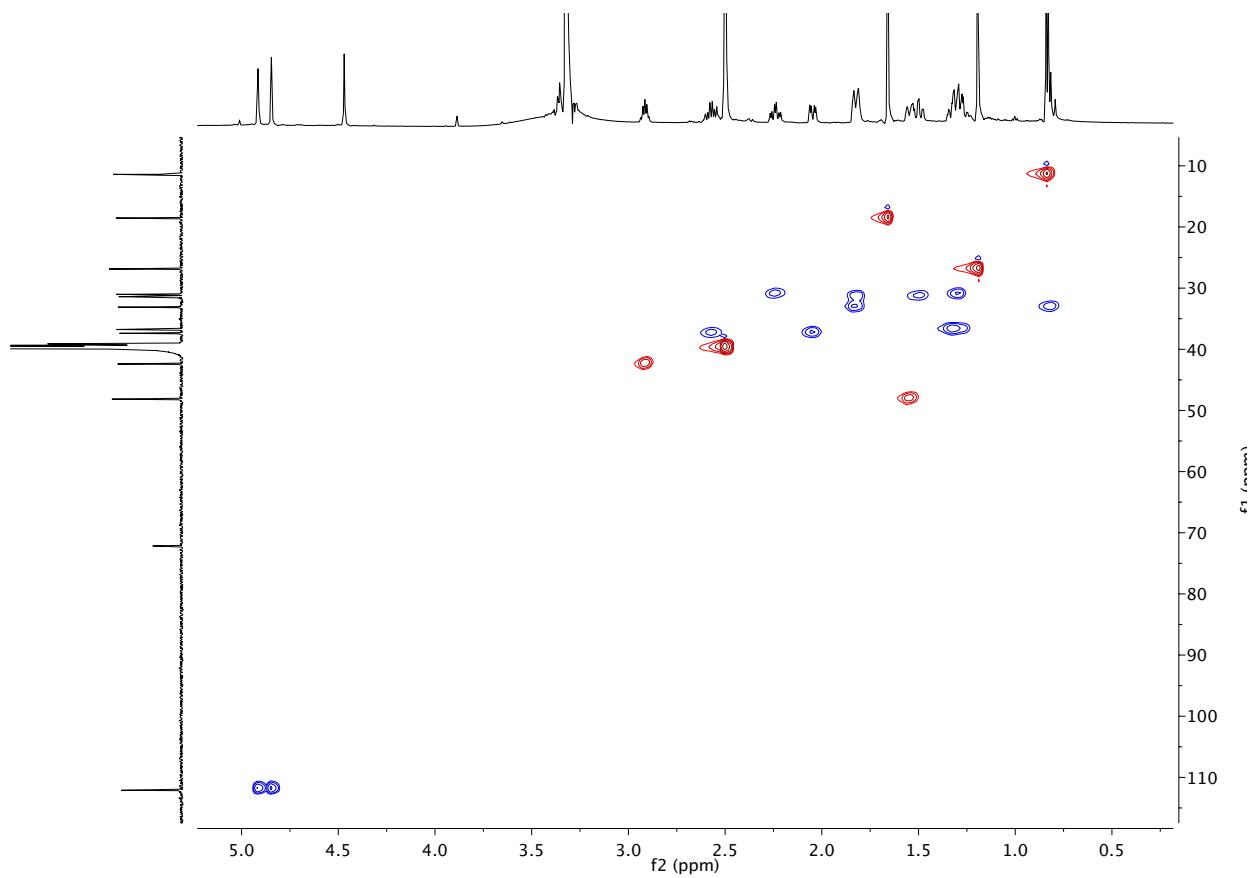

Figure S15. HSQC Spectrum of **3** in DMSO-*d*<sub>6</sub>

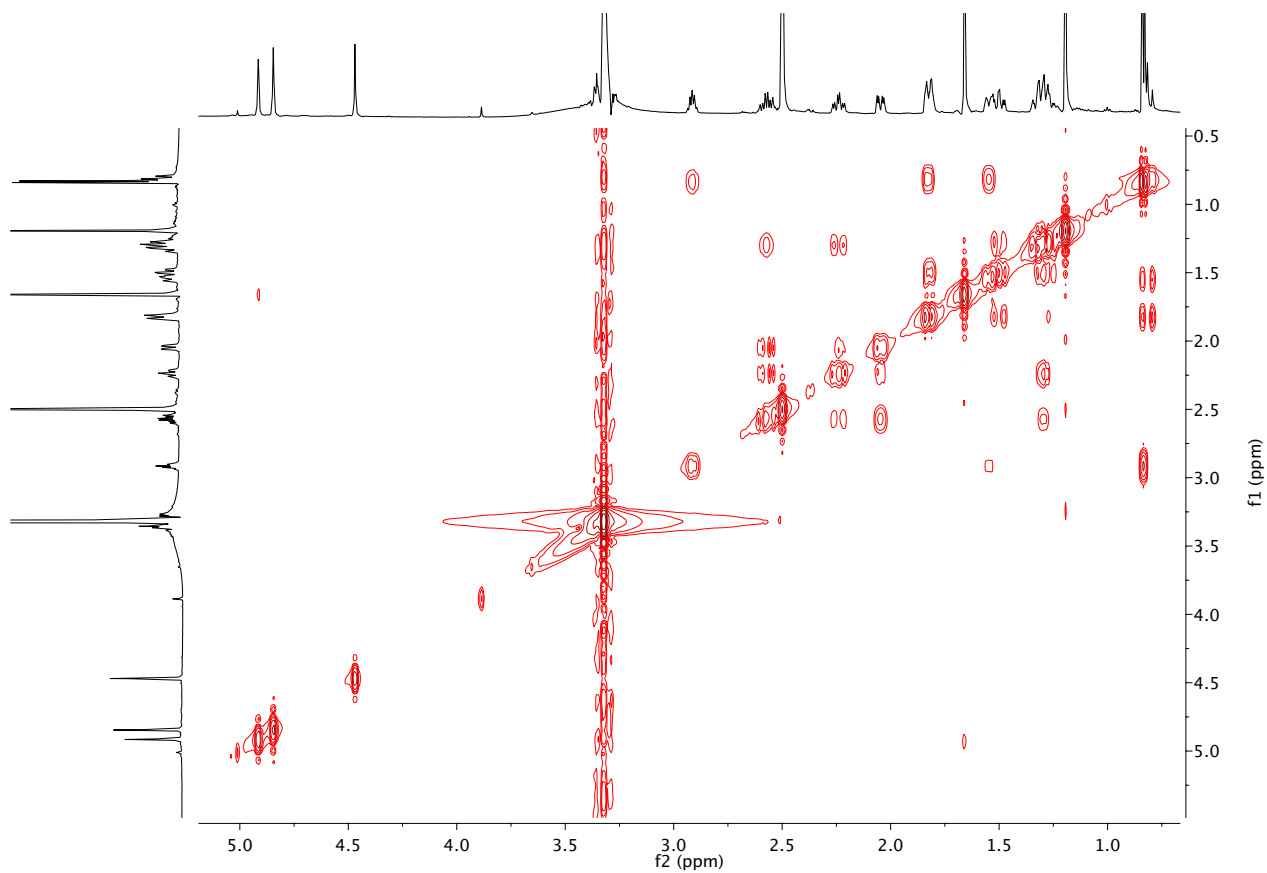

Figure S16. COSY Spectrum of **3** in DMSO-*d*<sub>6</sub>

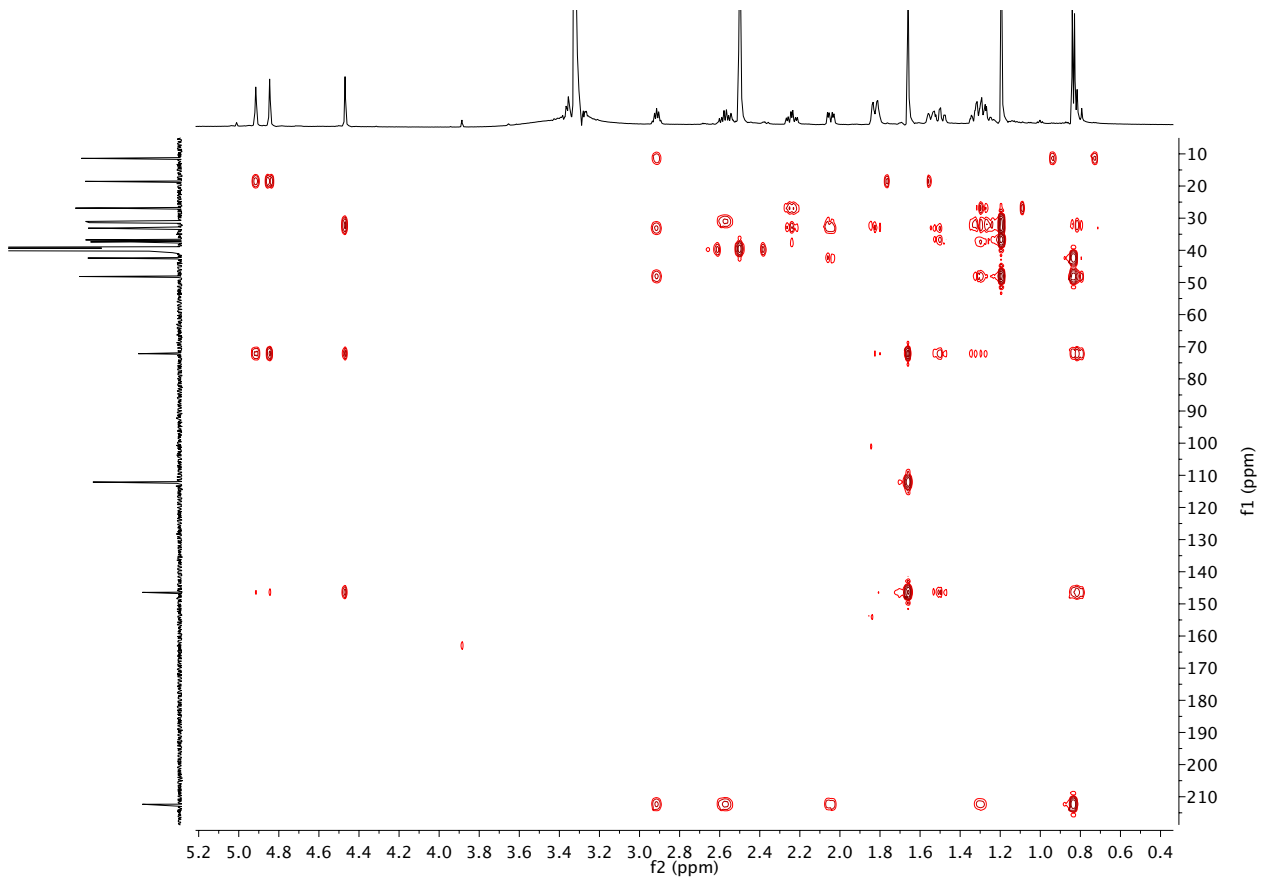

**Figure S17.** HMBC Spectrum of **3** in DMSO- $d_6$

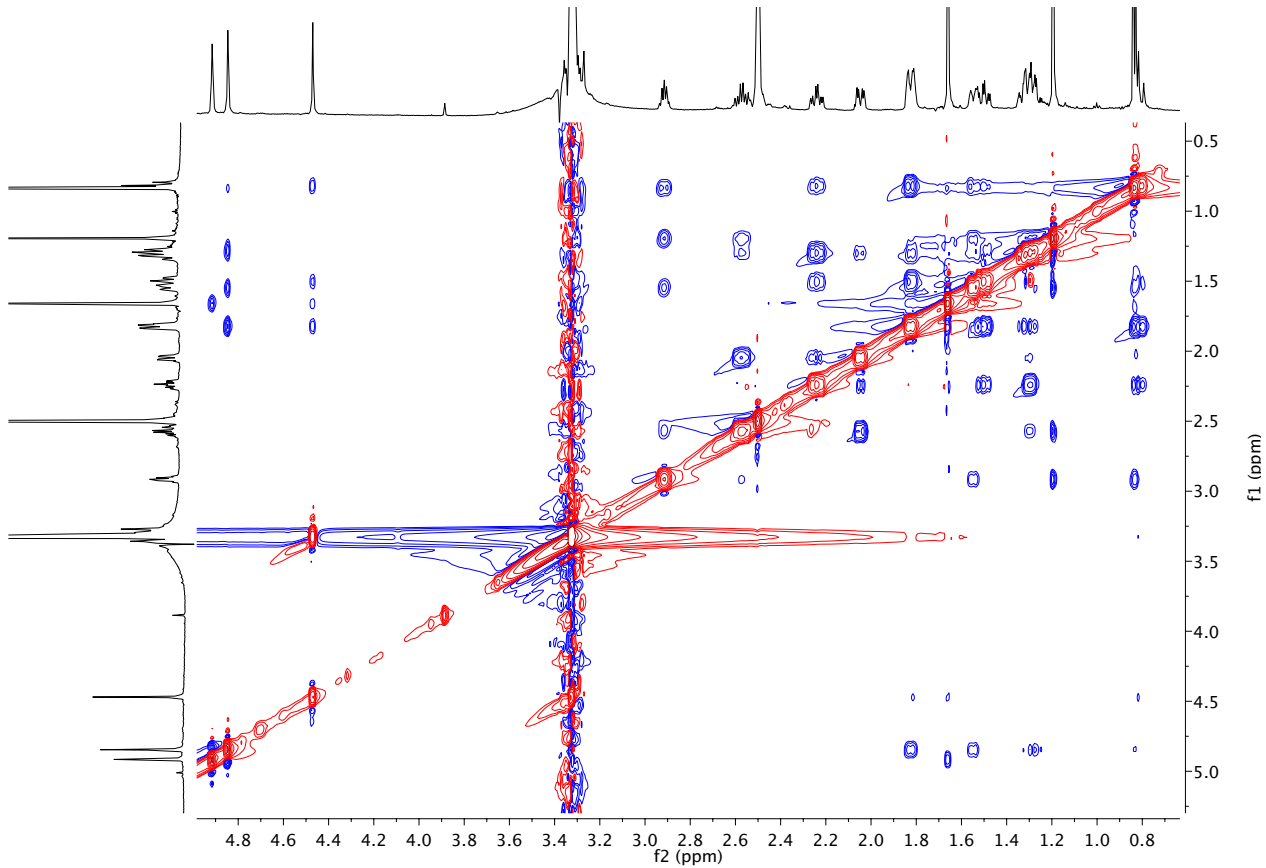

**Figure S18.** 2D NOESY Spectra of **3** in DMSO- $d_6$

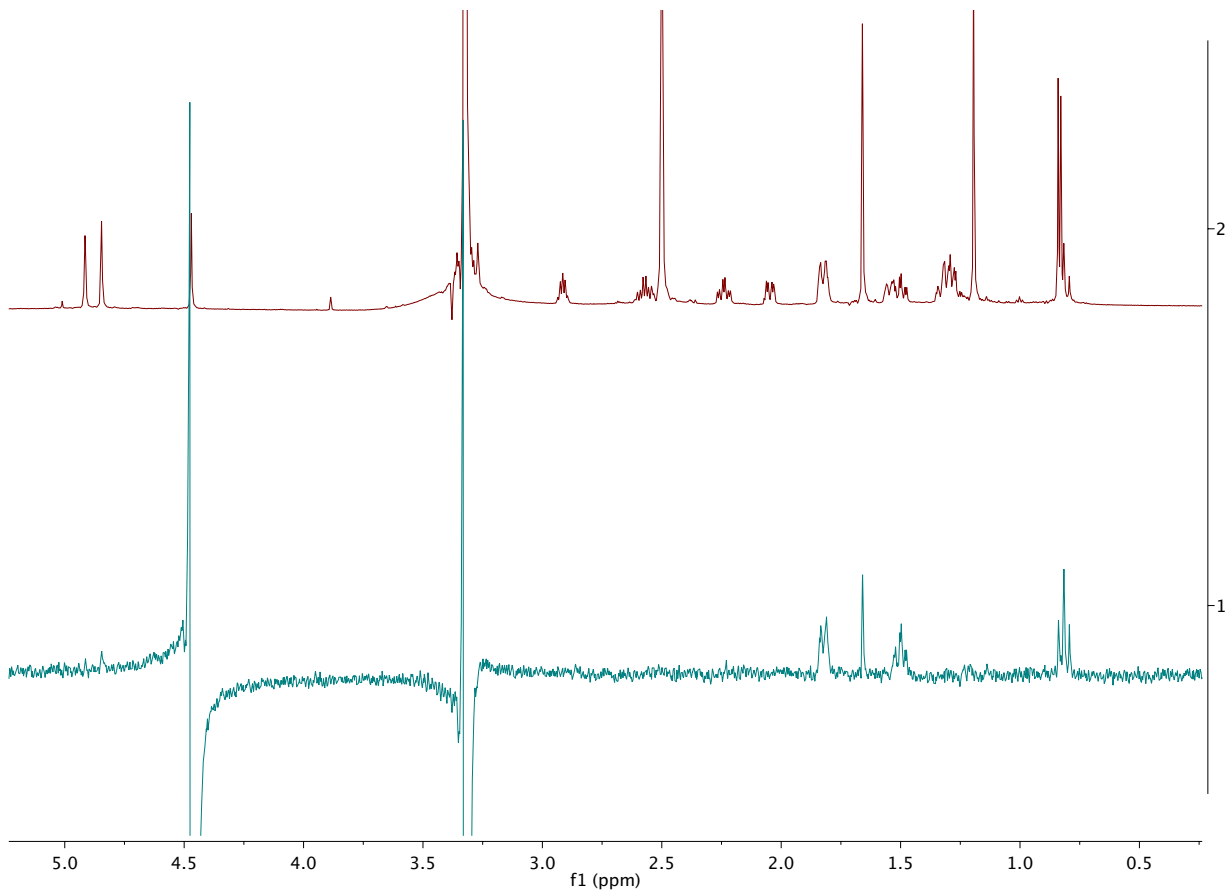

**Figure S19.** 1D NOESY Spectrum of **3** (irradiated at 4.47ppm) in DMSO- $d_6$

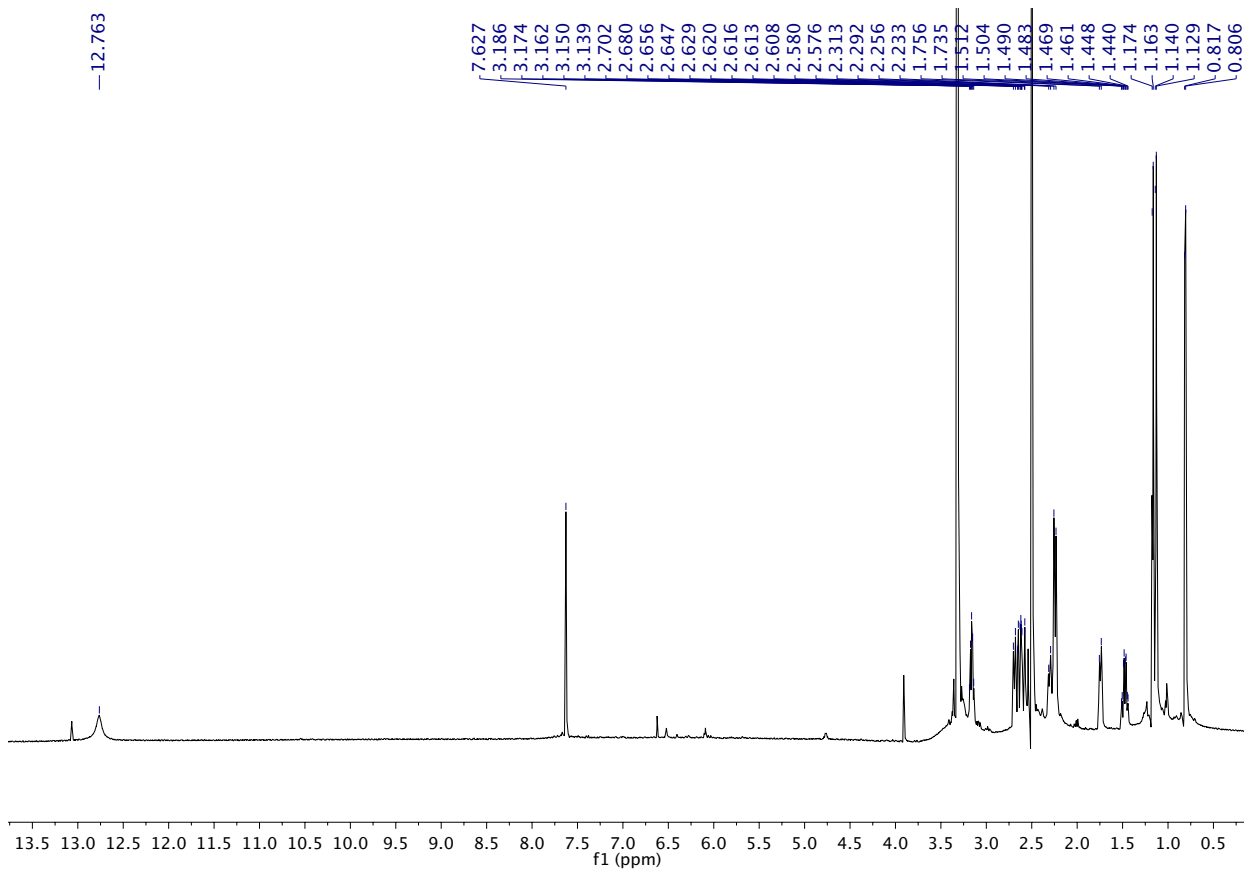

**Figure S20.**  $^1\text{H}$  Spectrum of **4** in DMSO- $d_6$

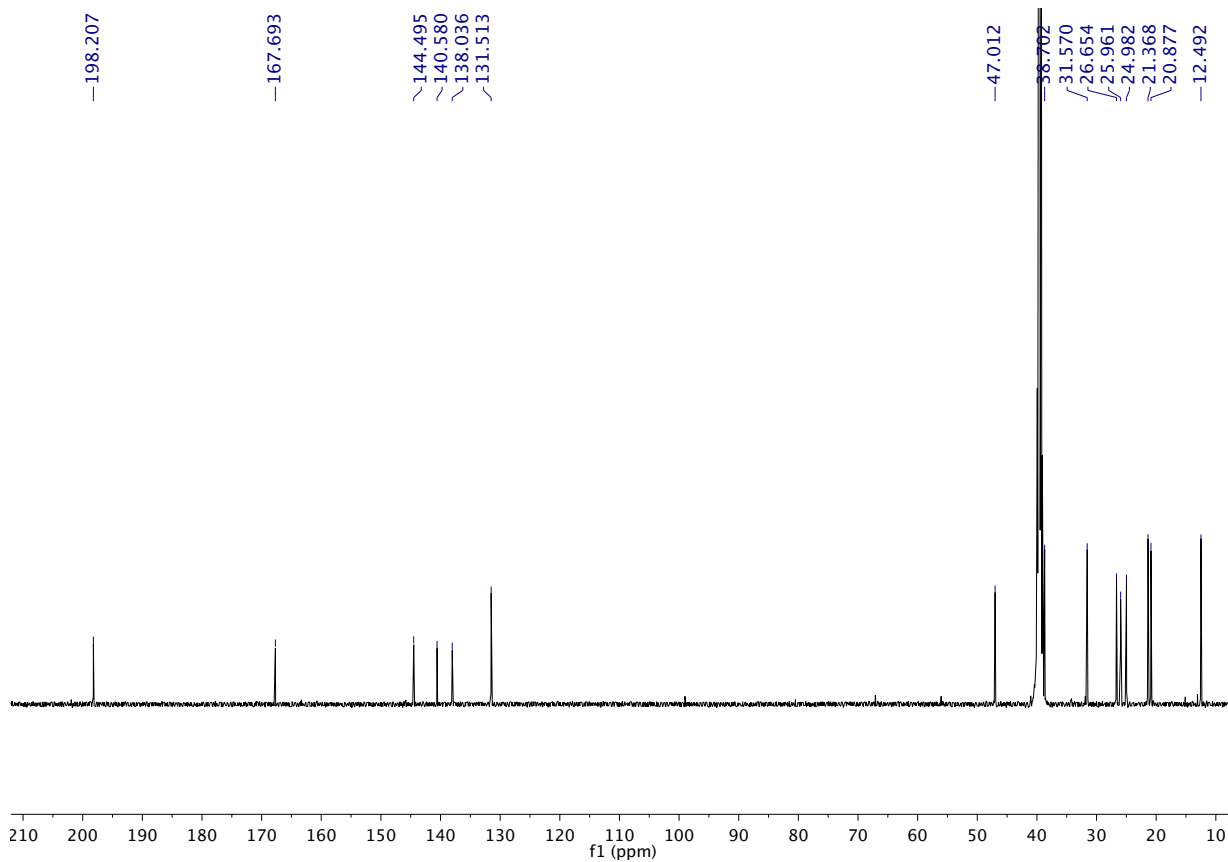

**Figure S21.**  $^{13}\text{C}$  Spectrum of **4** in  $\text{DMSO-}d_6$

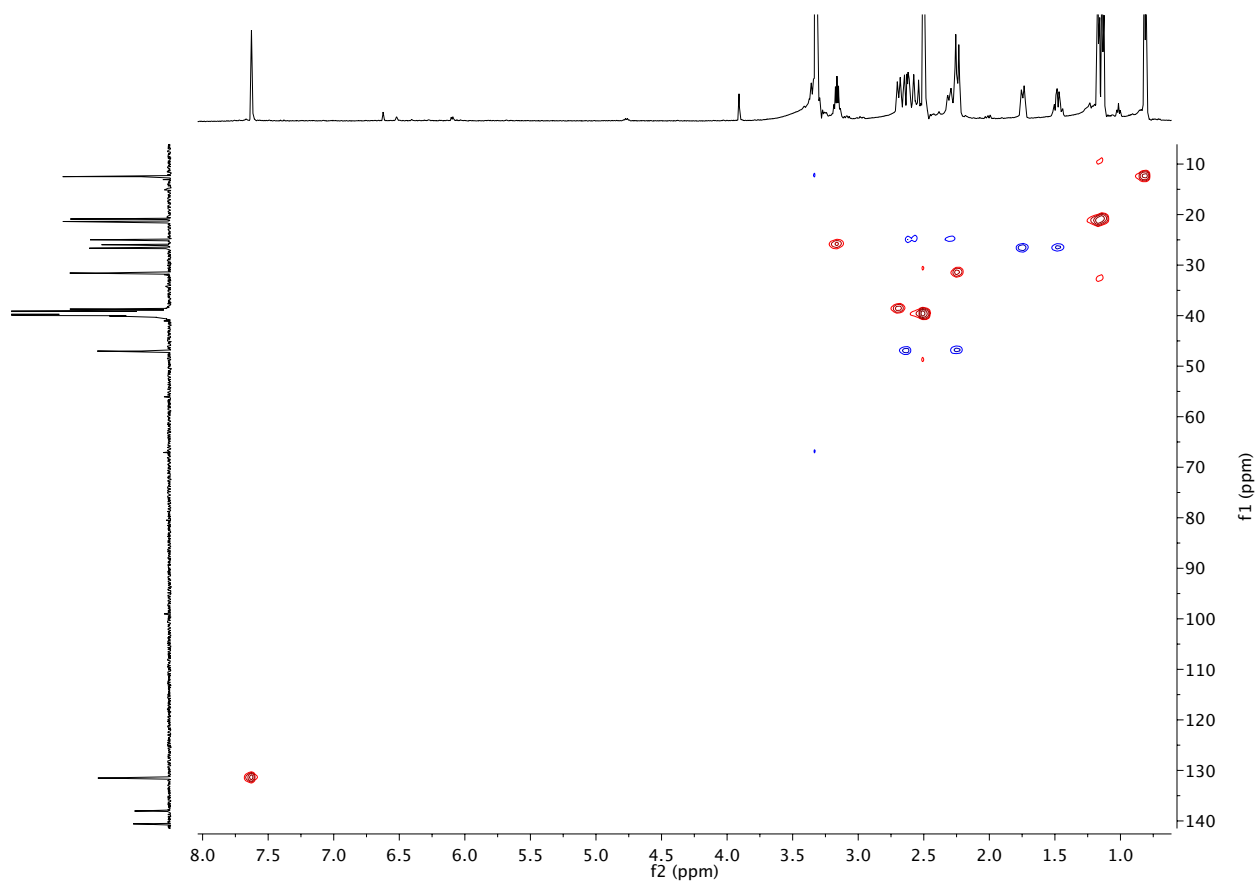

**Figure S22.** HSQC Spectrum of **4** in  $\text{DMSO-}d_6$



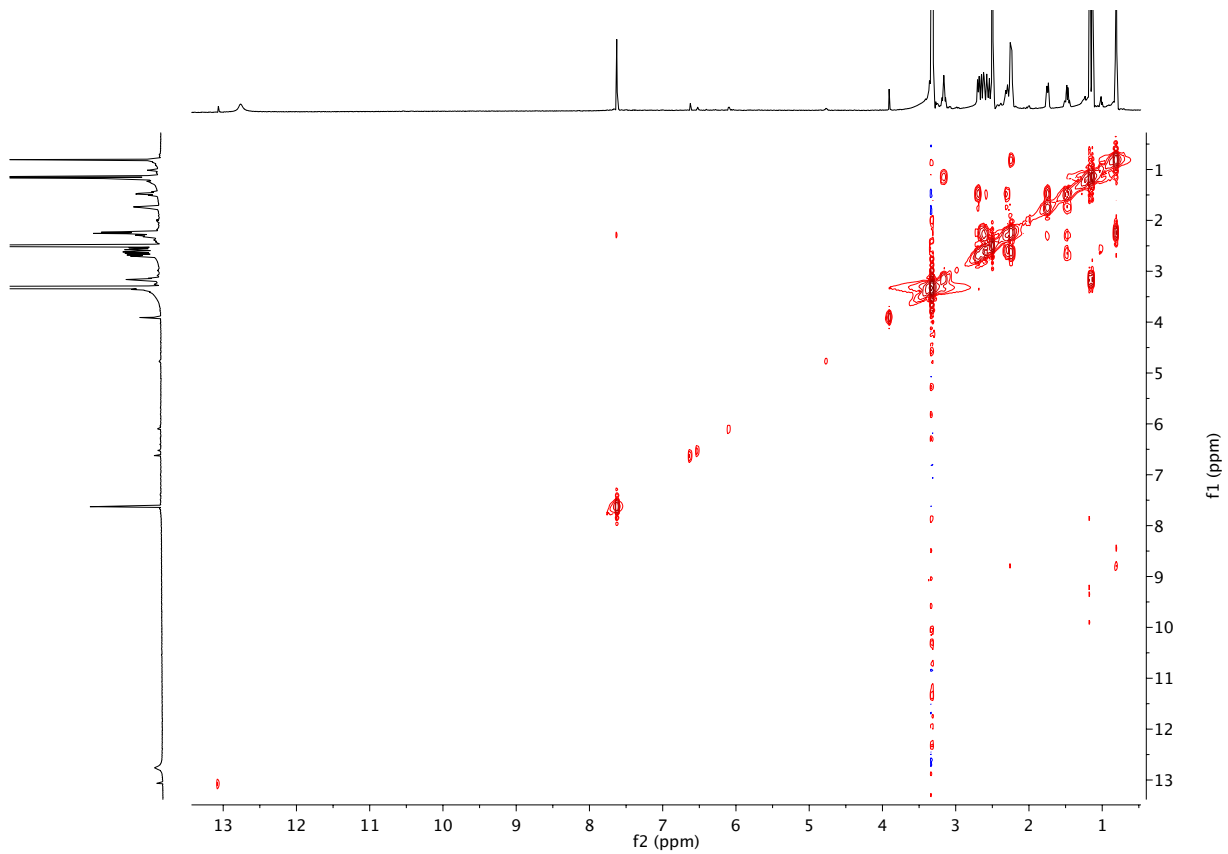

**Figure S23.** COSY Spectrum of **4** in DMSO-*d*<sub>6</sub>

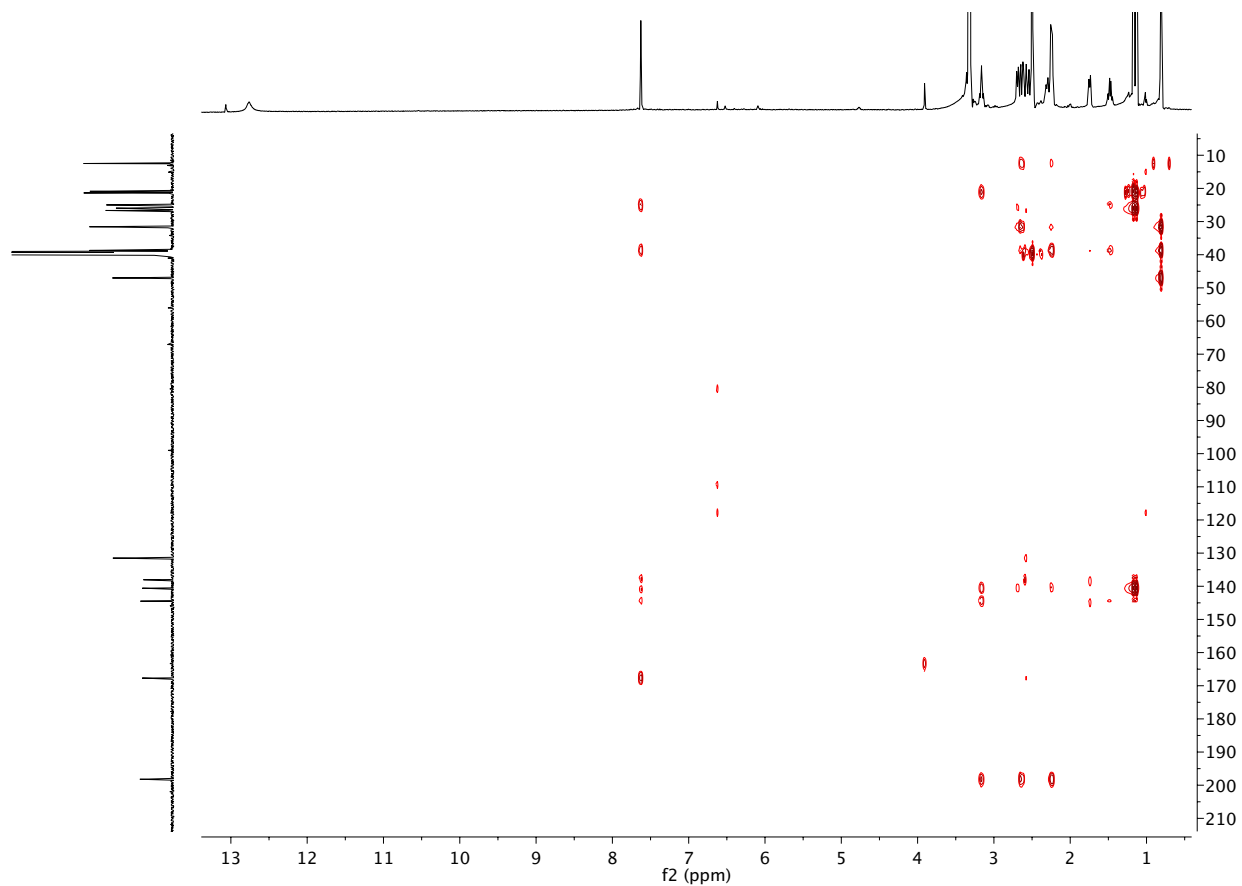

**Figure S24.** HMBC Spectrum of **4** in DMSO-*d*<sub>6</sub>

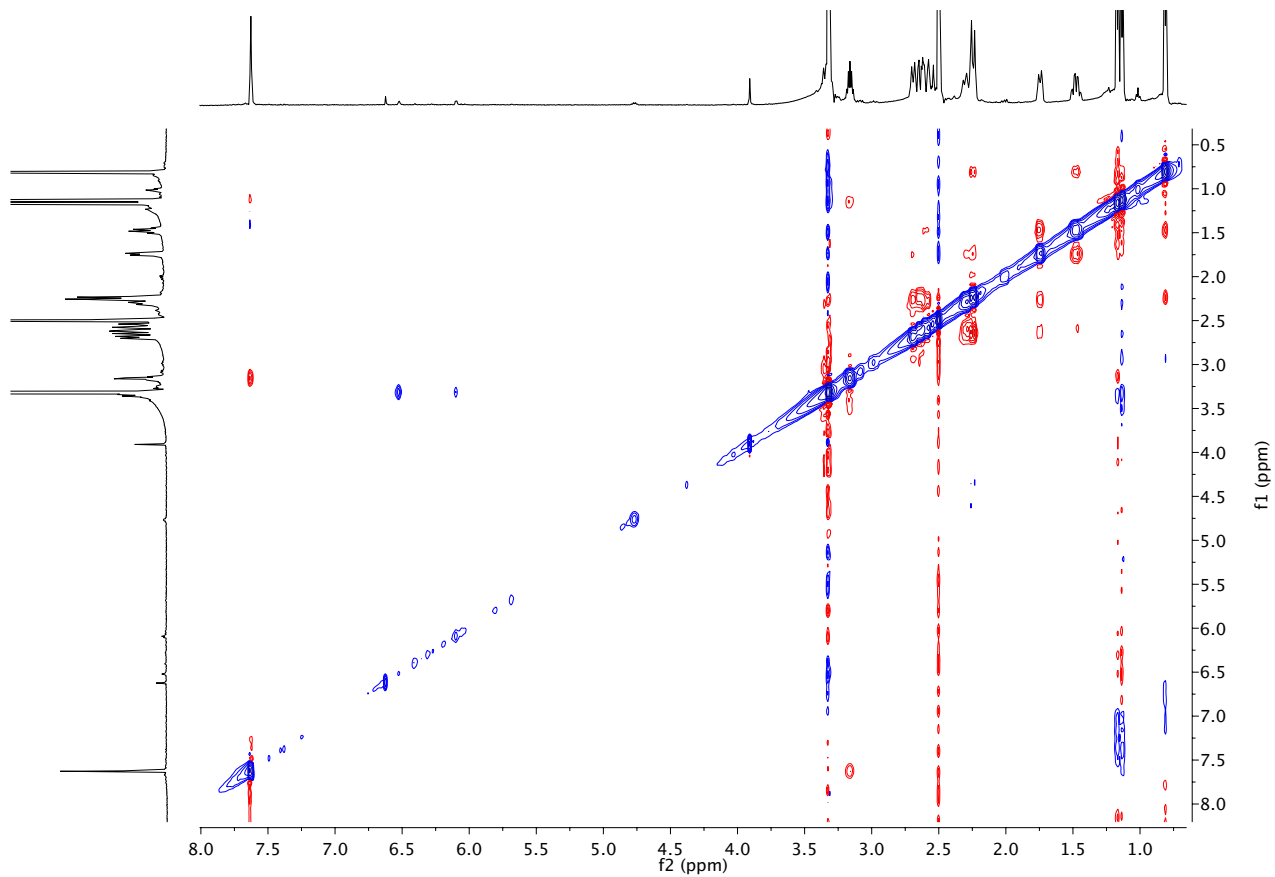

**Figure S25.** 2D ROESY Spectra of **4** in DMSO- $d_6$

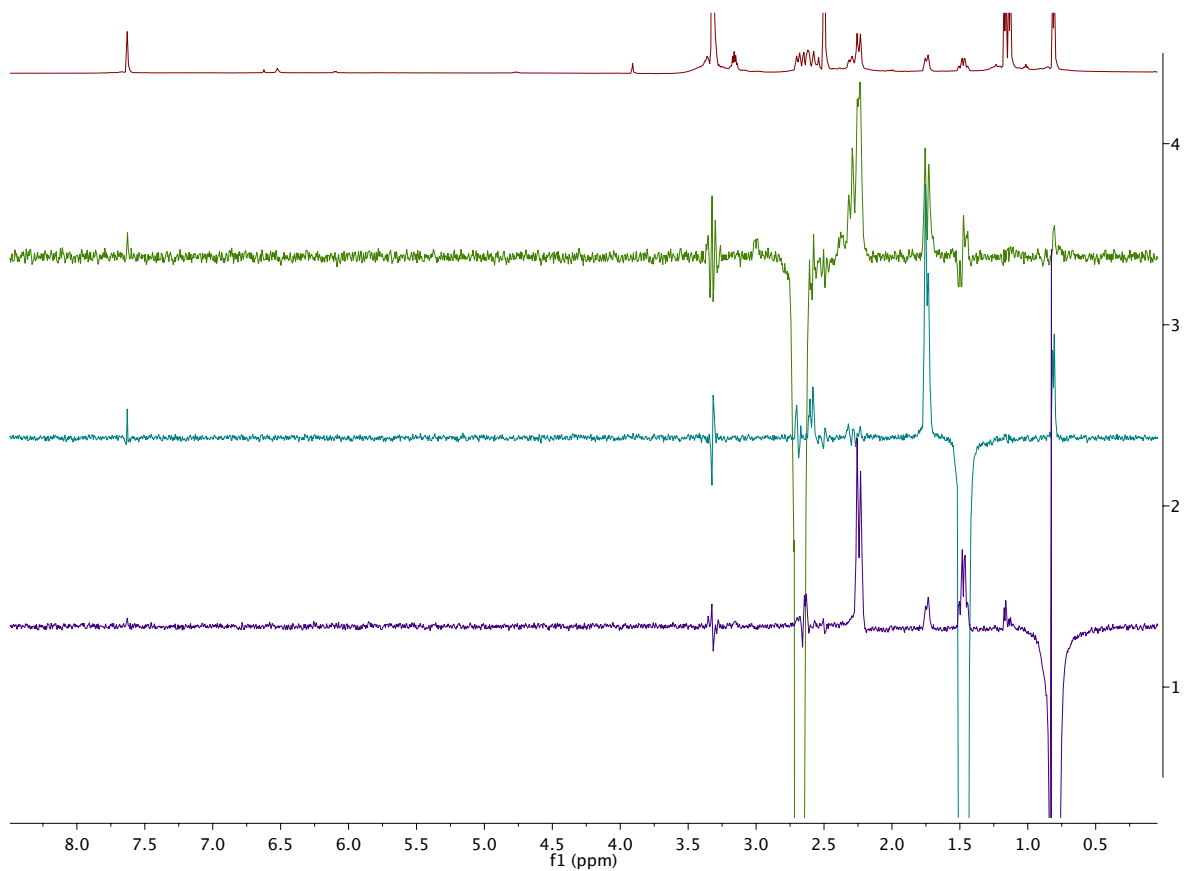

**Figure S26.** 1D NOESY Spectra of **4** in DMSO- $d_6$

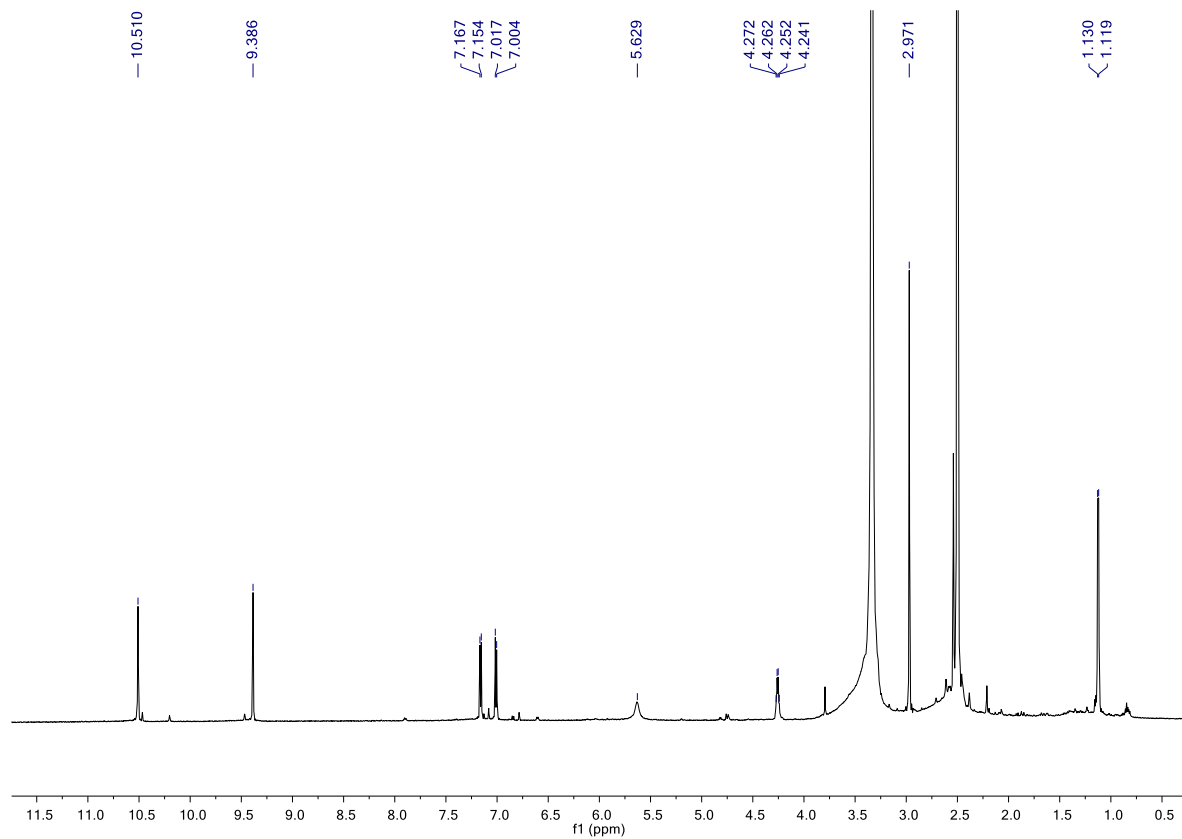

Figure S27.  $^1\text{H}$  Spectrum of **5** in  $\text{DMSO-}d_6$

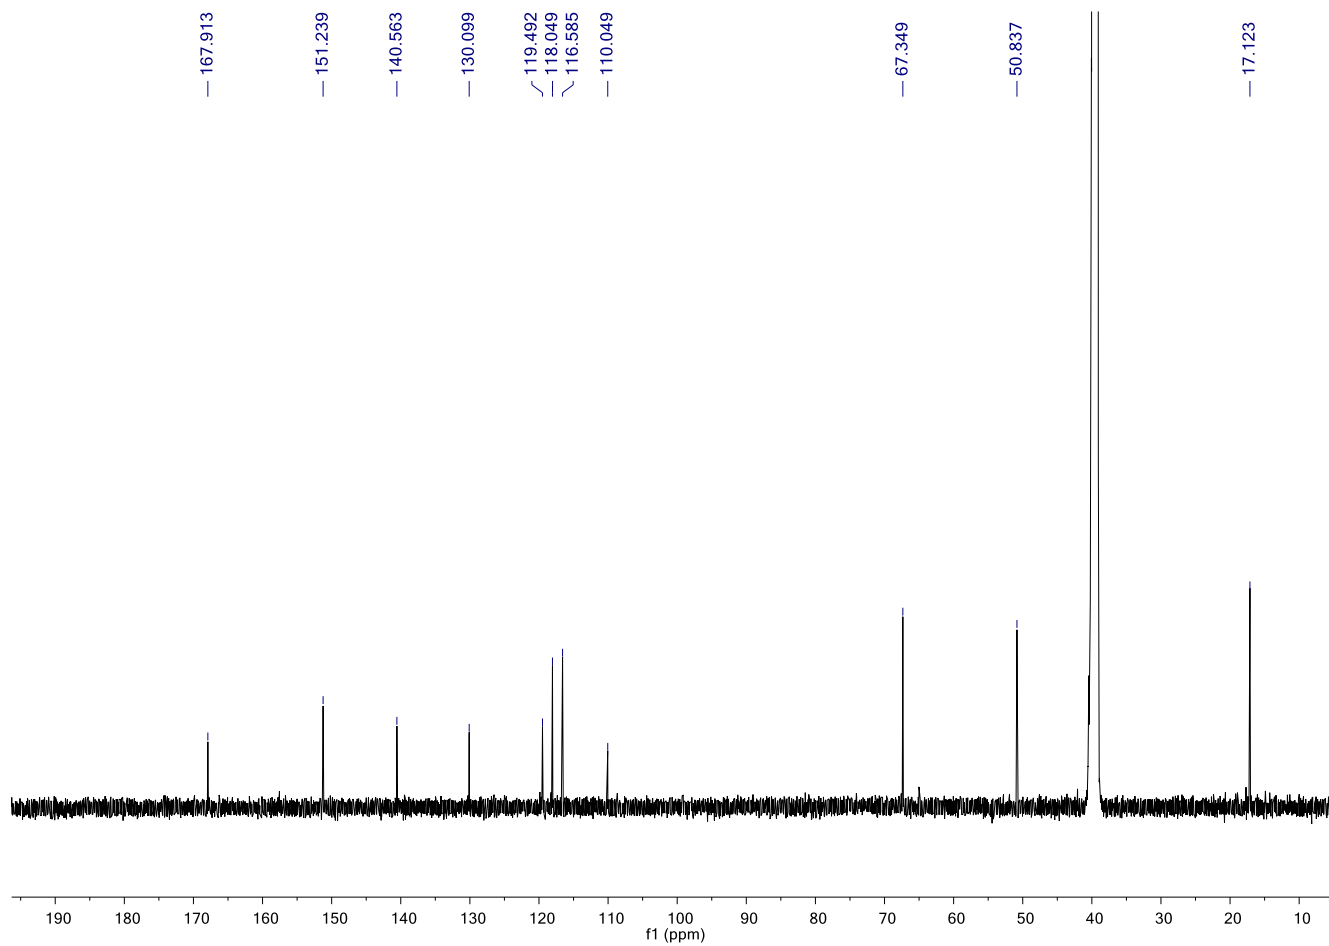

Figure S28.  $^{13}\text{C}$  Spectrum of **5** in  $\text{DMSO-}d_6$

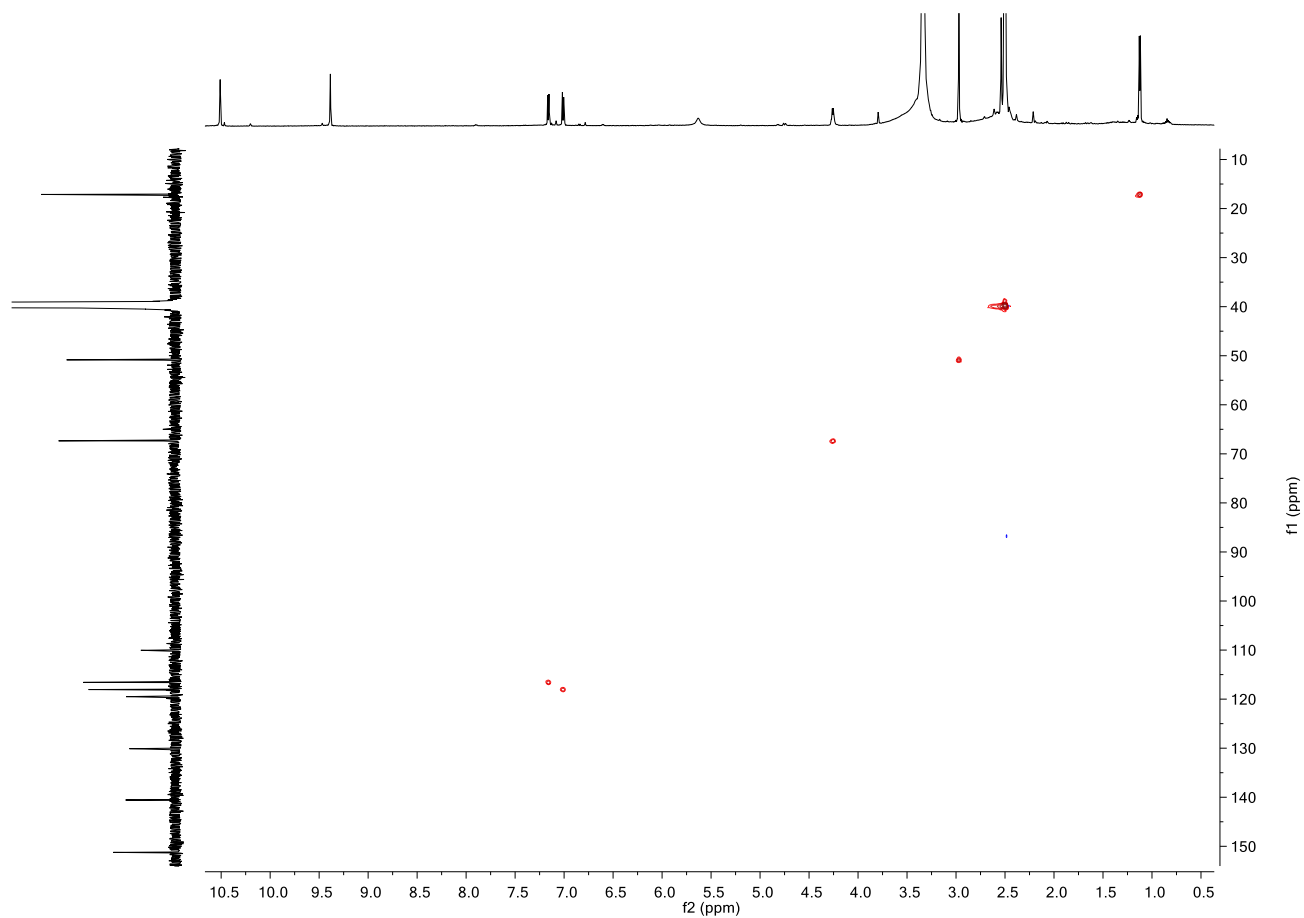

**Figure S29.** HSQC Spectrum of **5** in DMSO- $d_6$

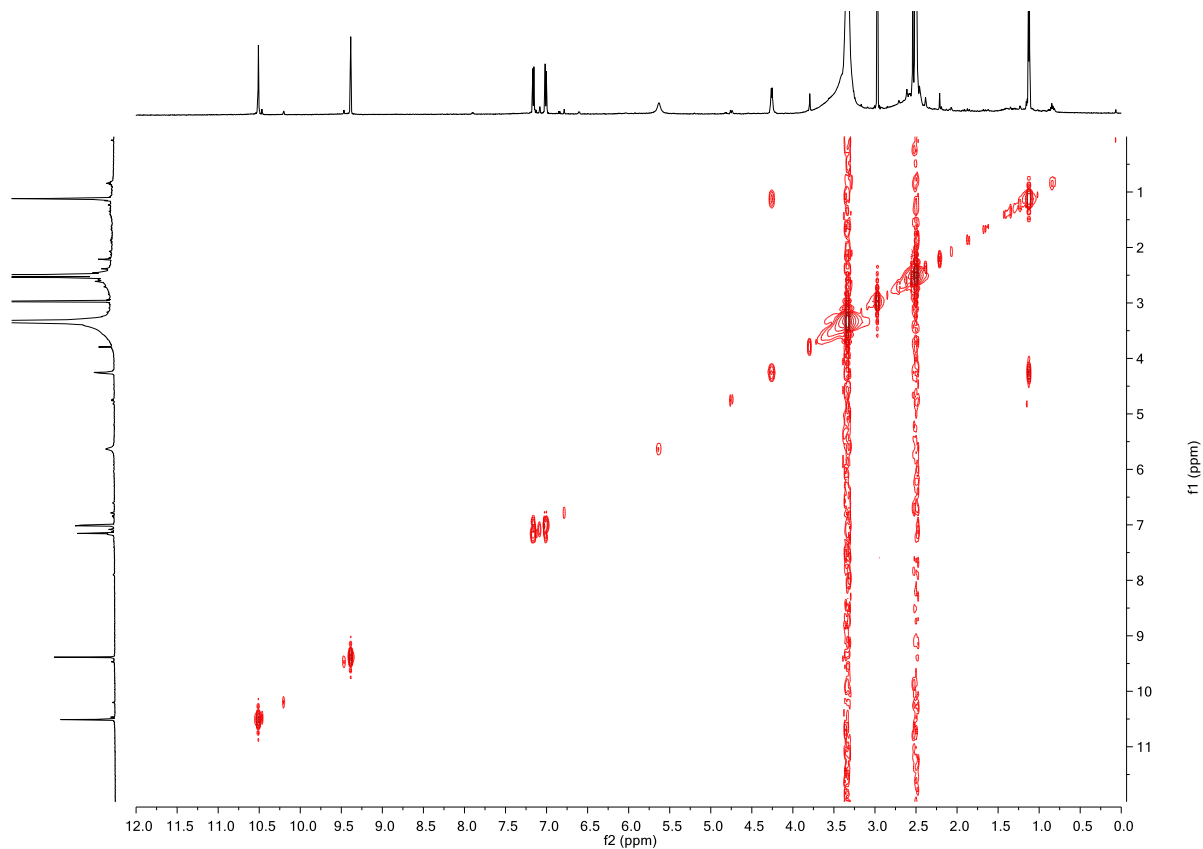

**Figure S30.** COSY Spectrum of **5** in DMSO- $d_6$

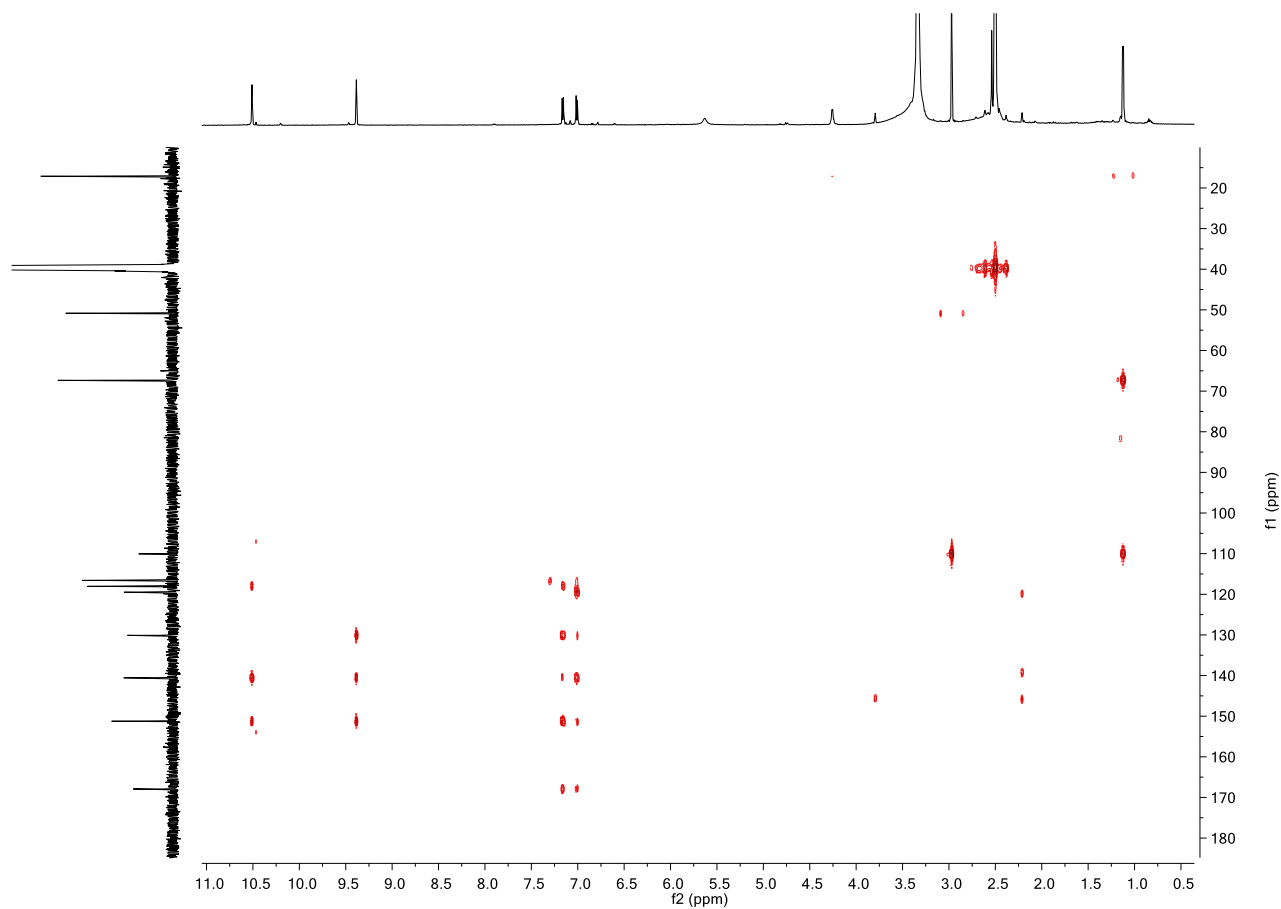

Figure S31. HMBC ( $J_{\text{HC}} = 8$  Hz) Spectrum of **5** in DMSO- $d_6$

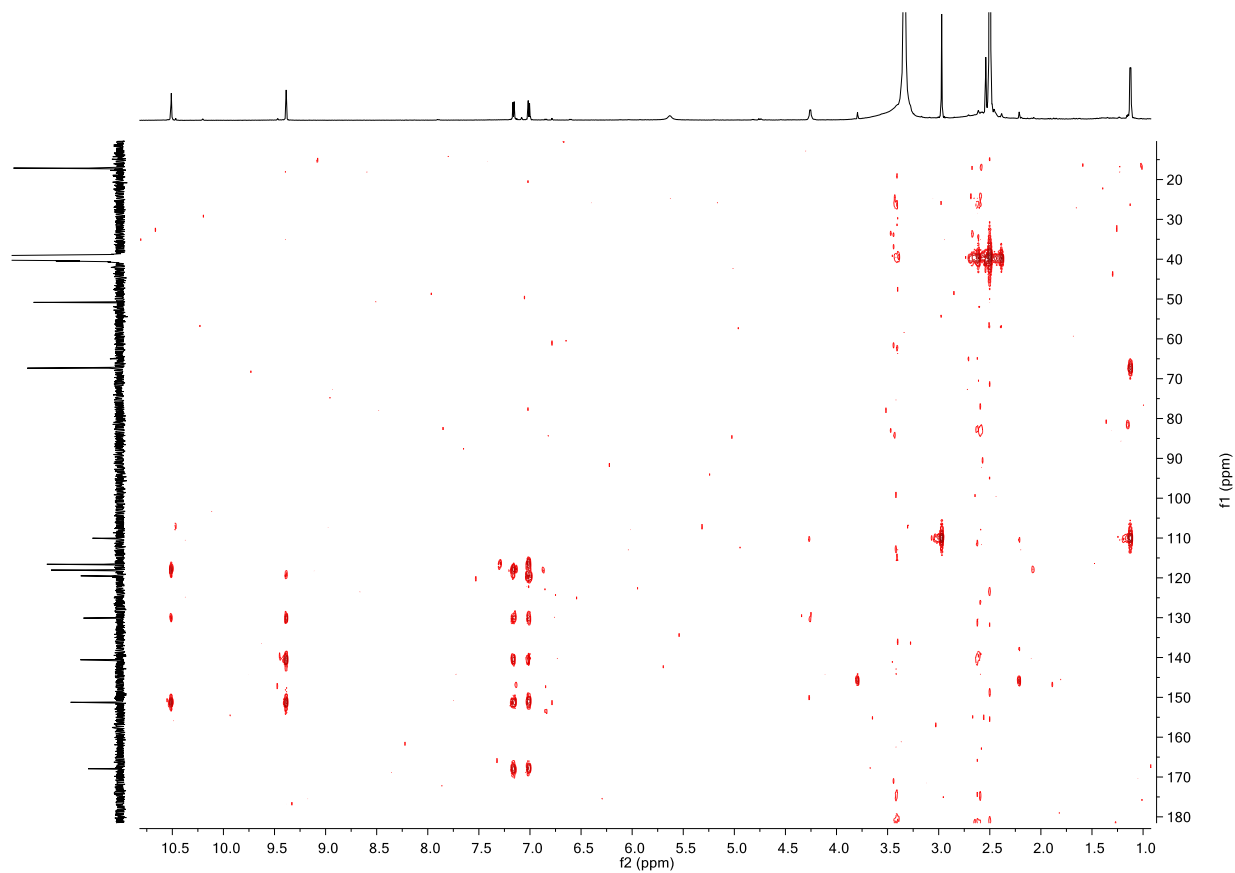

Figure S32. HMBC ( $J_{\text{HC}} = 3$  Hz) Spectrum of **5** in DMSO- $d_6$

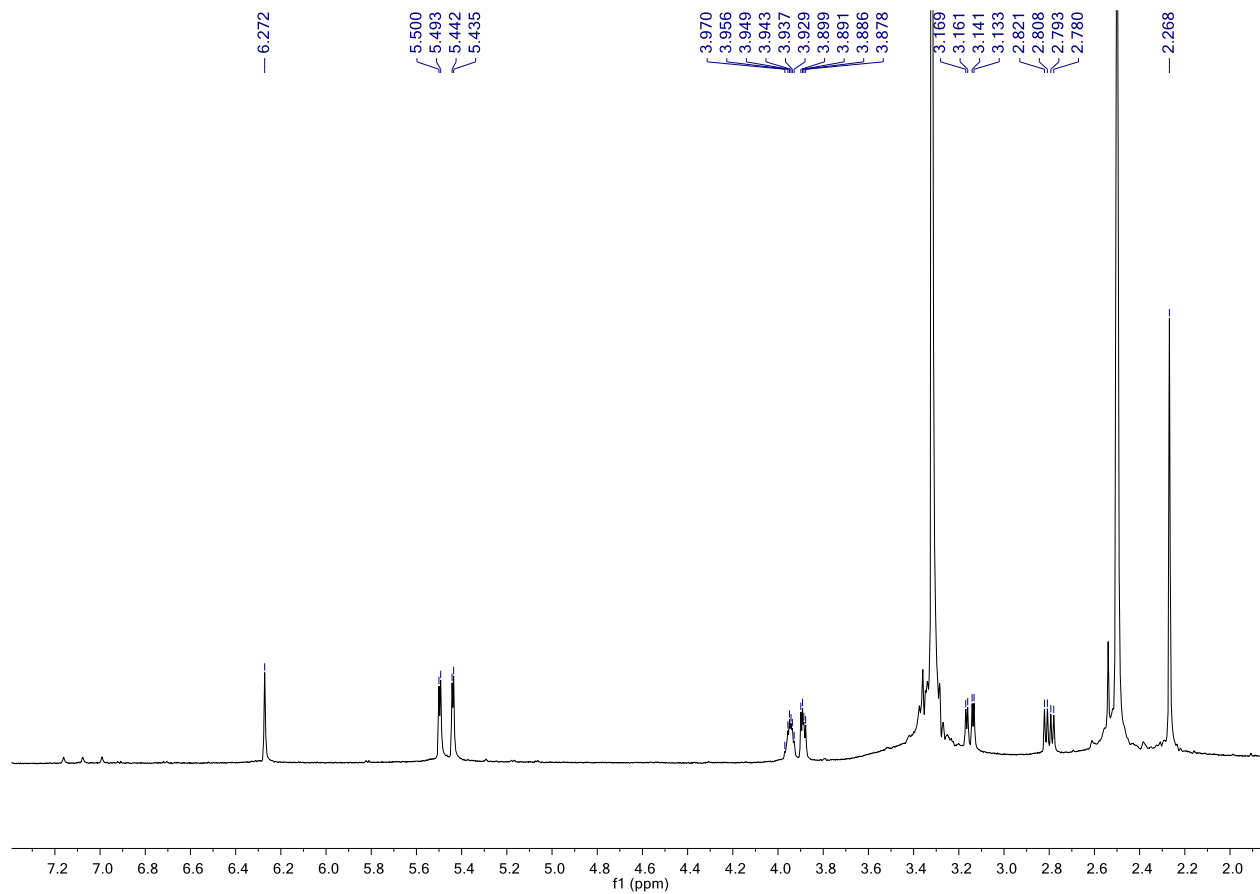

Figure S33.  $^1\text{H}$  Spectrum of **6** in  $\text{DMSO-}d_6$

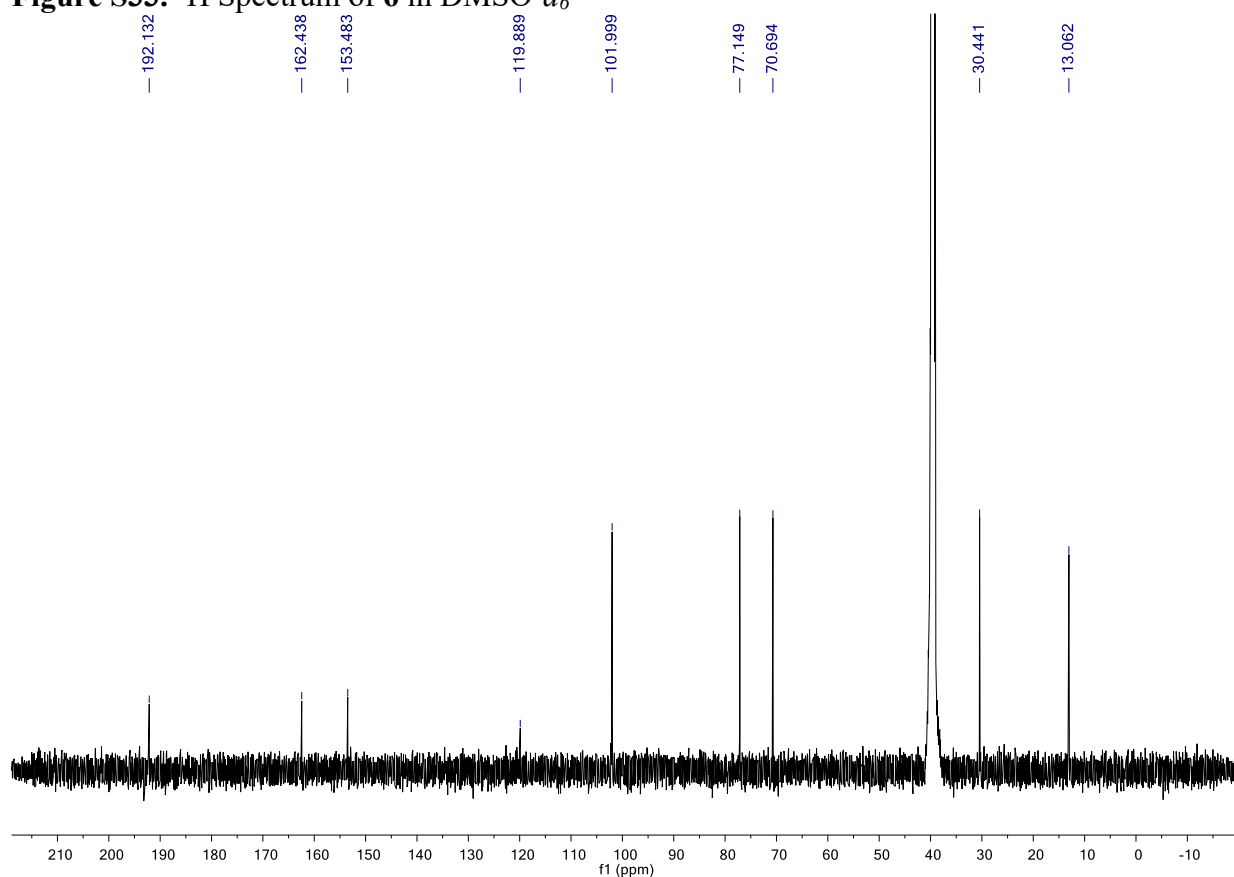

Figure S34.  $^{13}\text{C}$  Spectrum of **6** in  $\text{DMSO-}d_6$

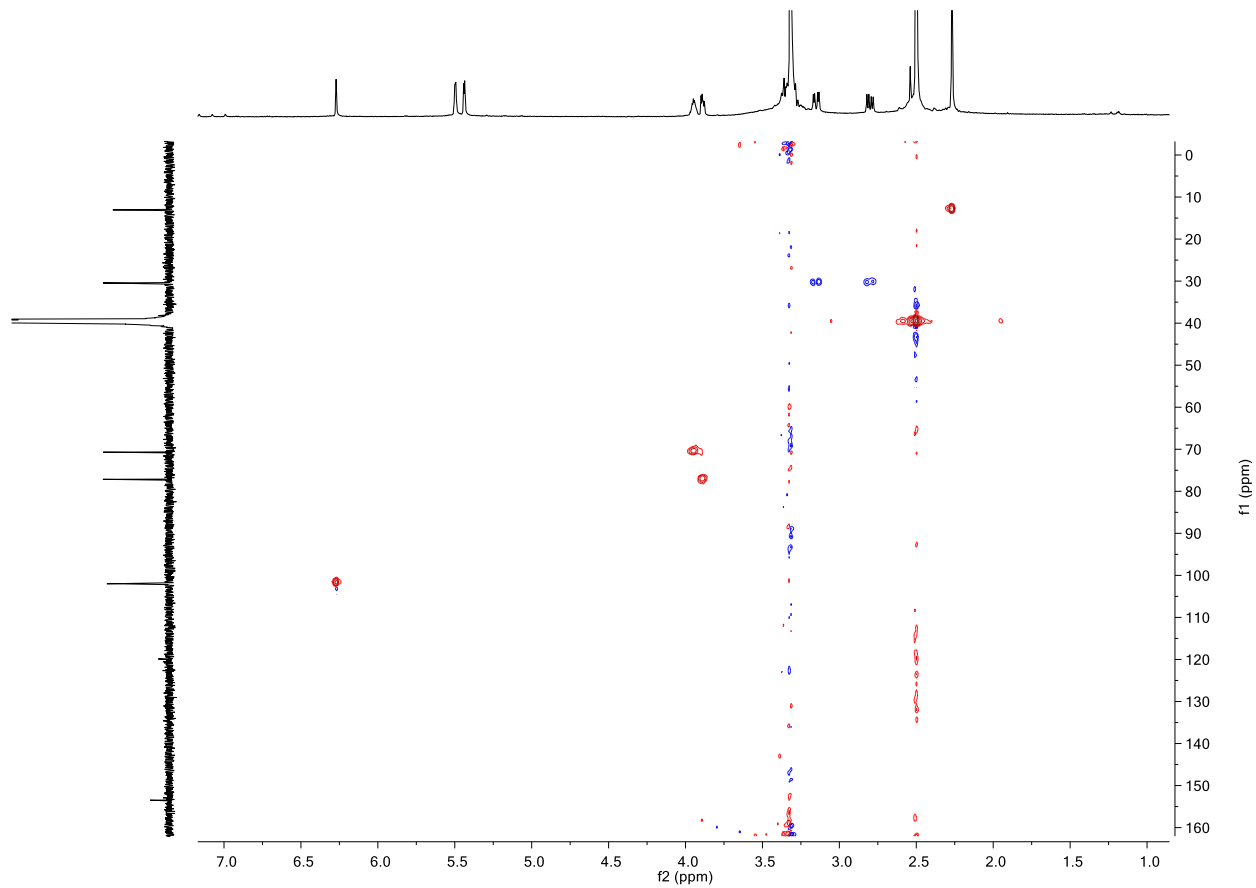

Figure S35. HSQC Spectrum of **6** in DMSO-*d*<sub>6</sub>

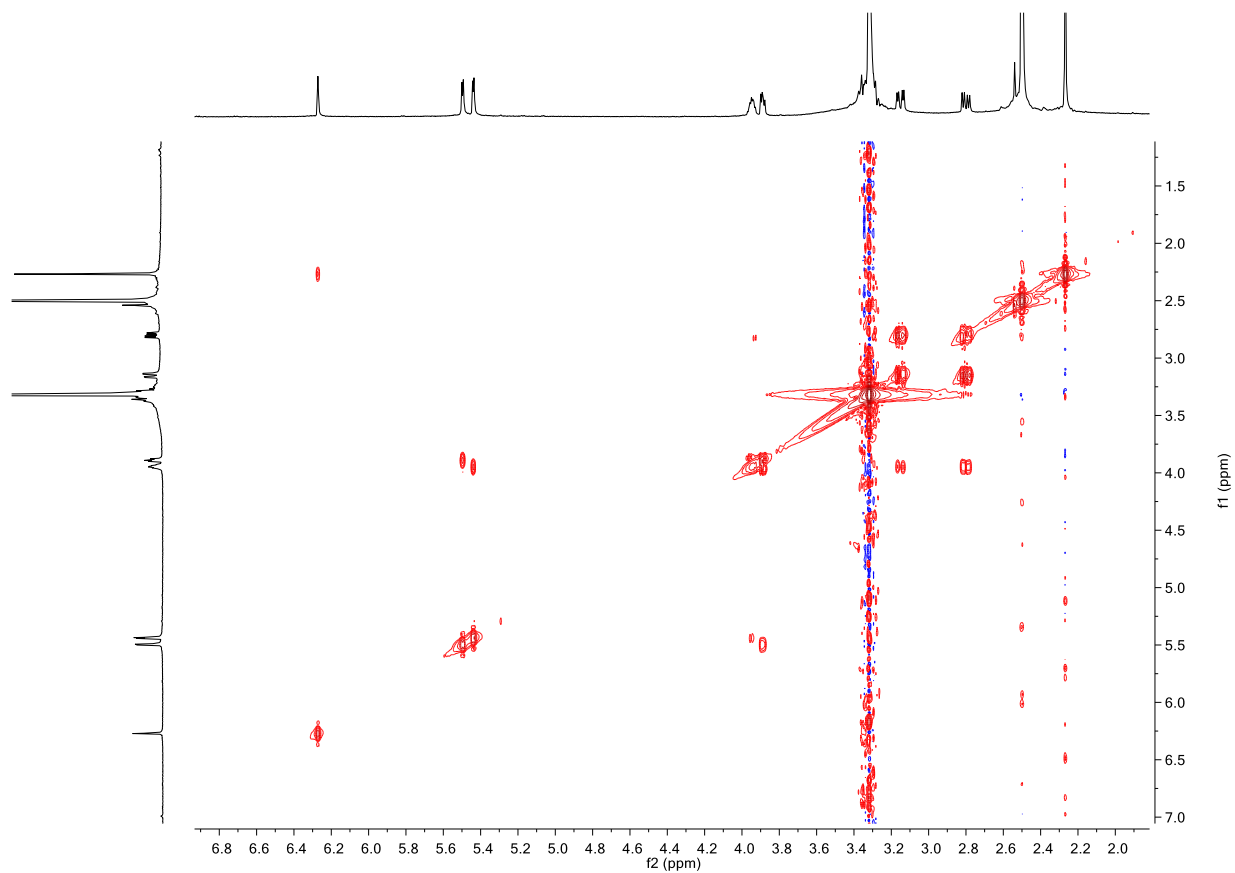

Figure S36. COSY Spectrum of **6** in DMSO-*d*<sub>6</sub>

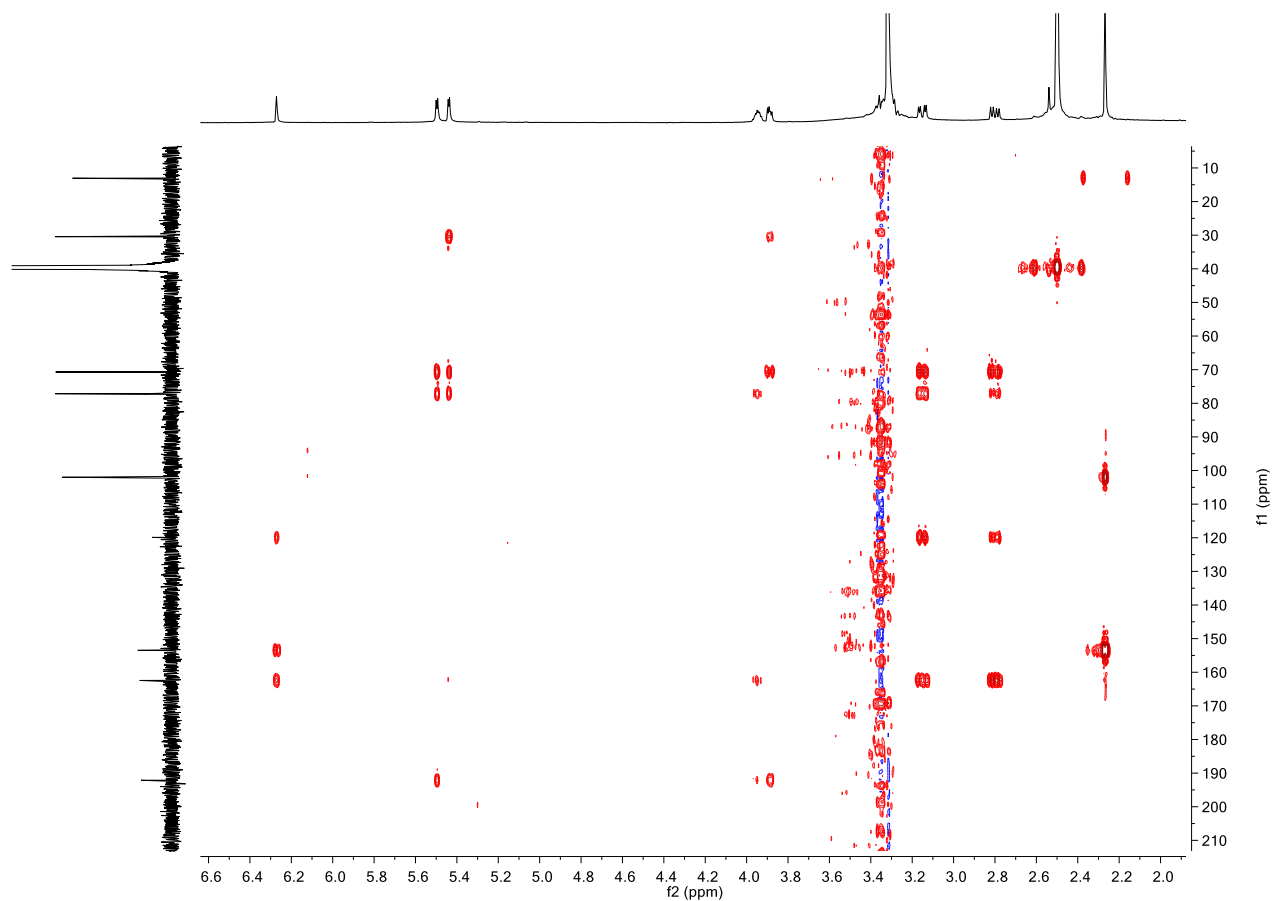

**Figure S37.** HMBC ( $J_{\text{HC}} = 8$  Hz) Spectrum of **6** in DMSO-*d*<sub>6</sub>

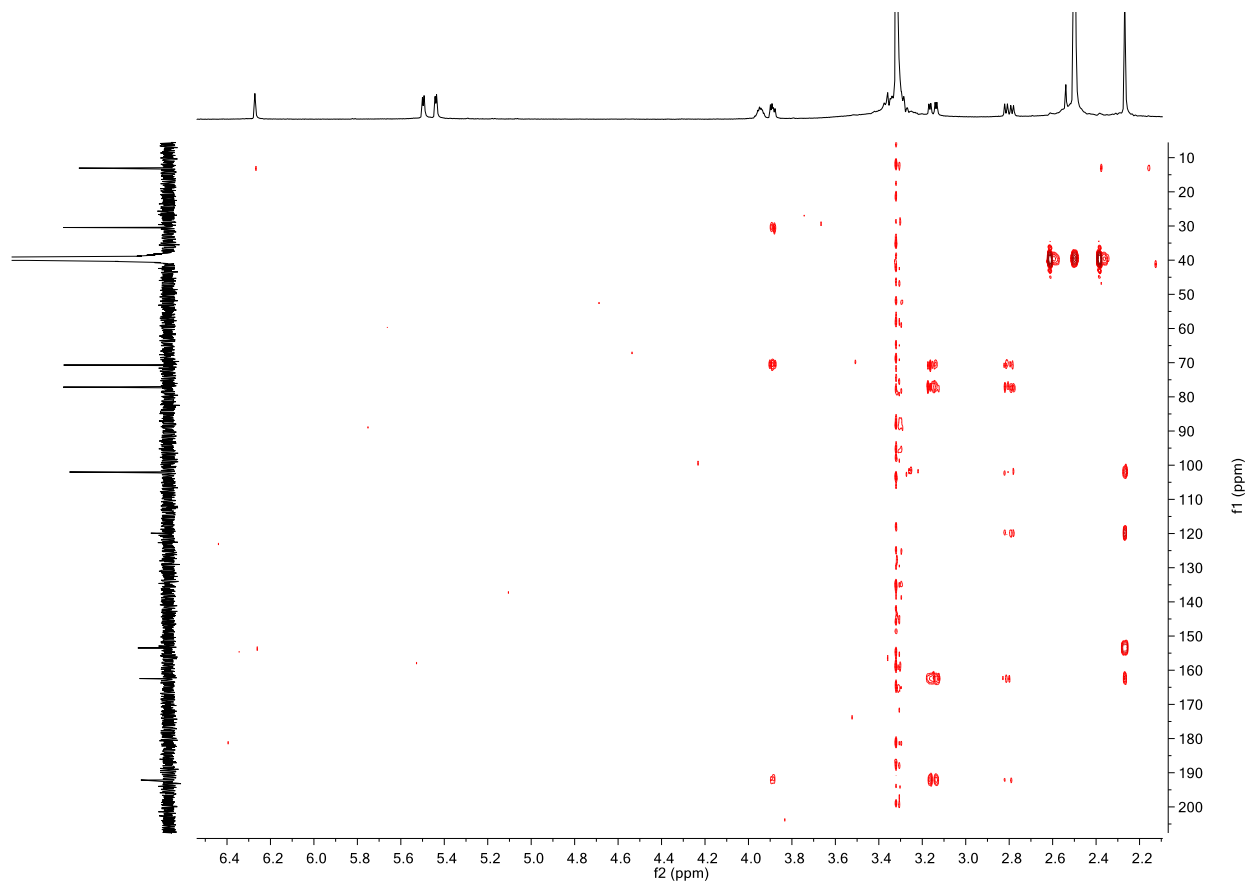

**Figure S38.** HMBC ( $J_{\text{HC}} = 2$  Hz) Spectrum of **6** in DMSO-*d*<sub>6</sub>



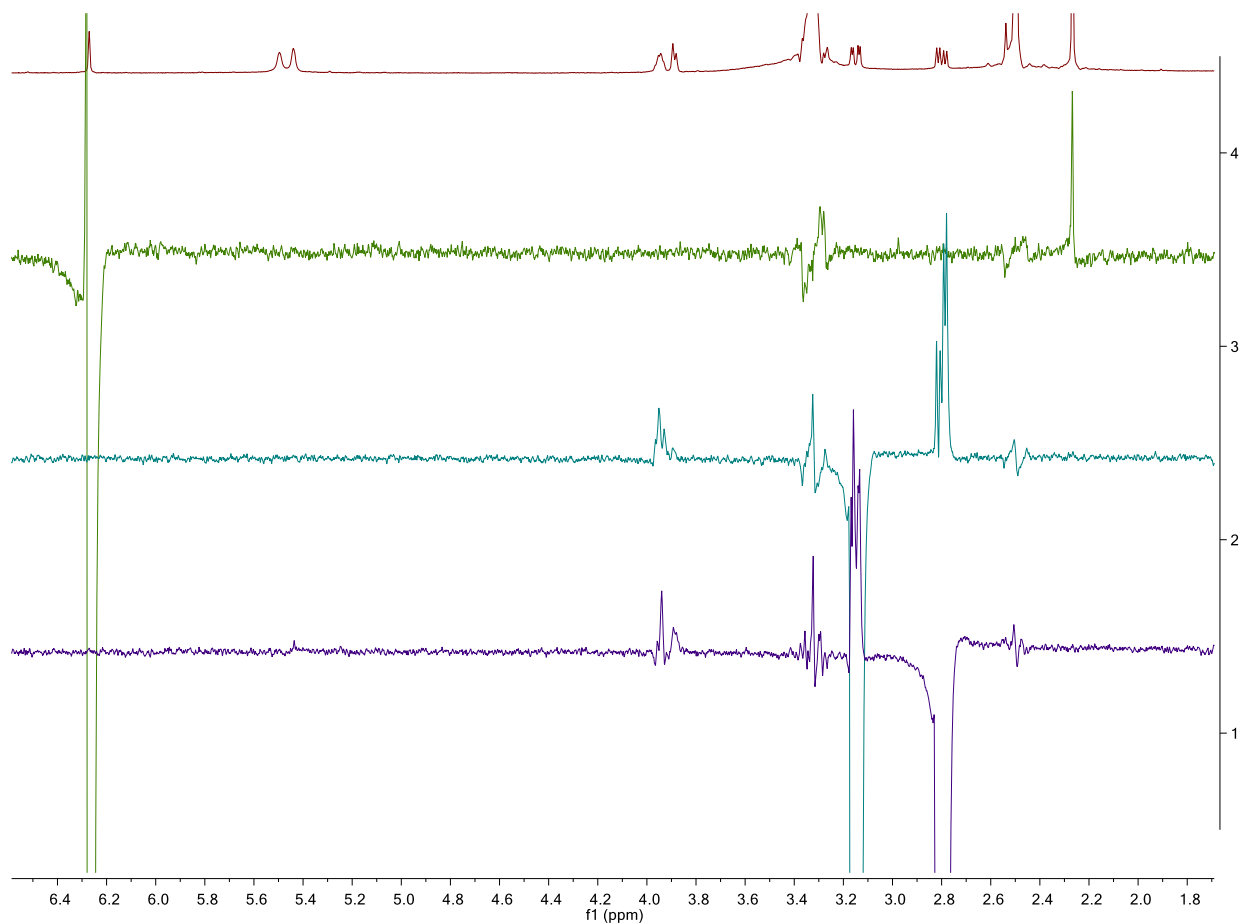

Figure S39. 1D NOESY Spectrum of **6** in DMSO- $d_6$

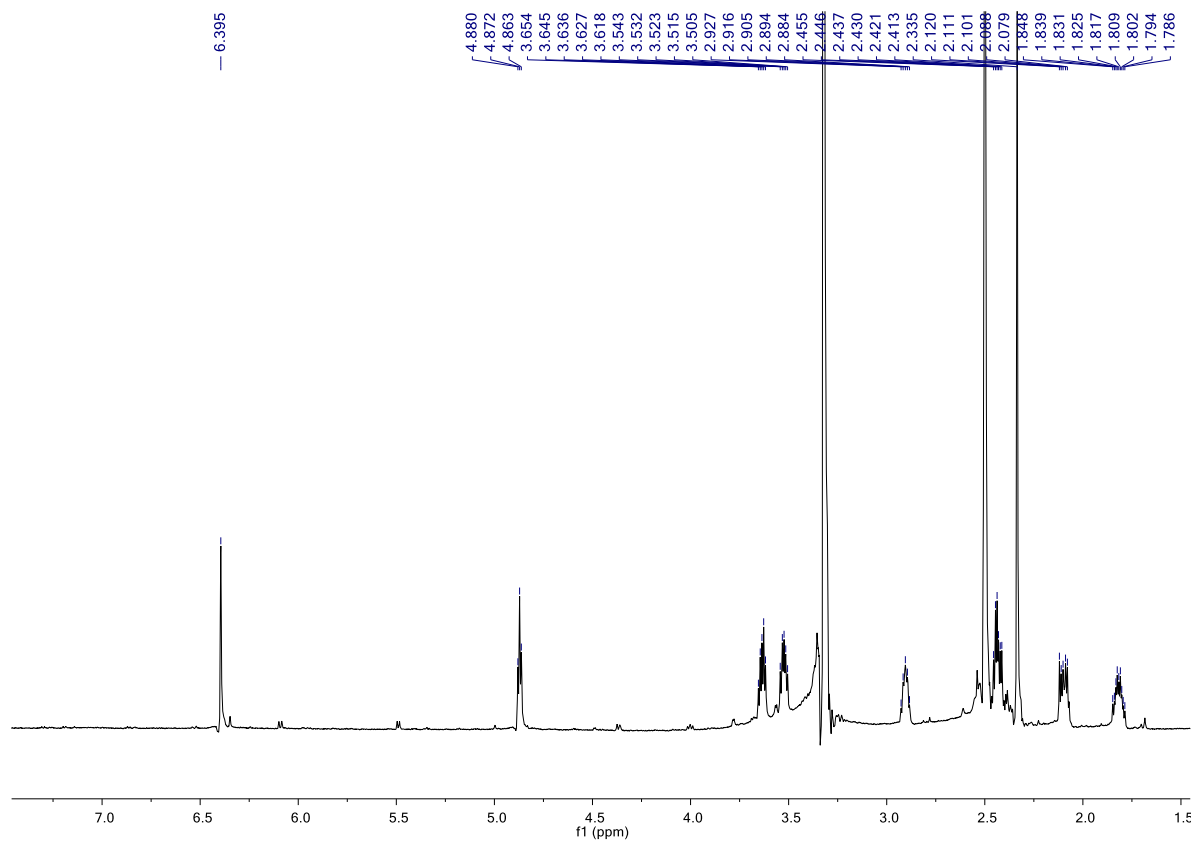

Figure S40.  $^1\text{H}$  Spectrum of **7** in DMSO- $d_6$

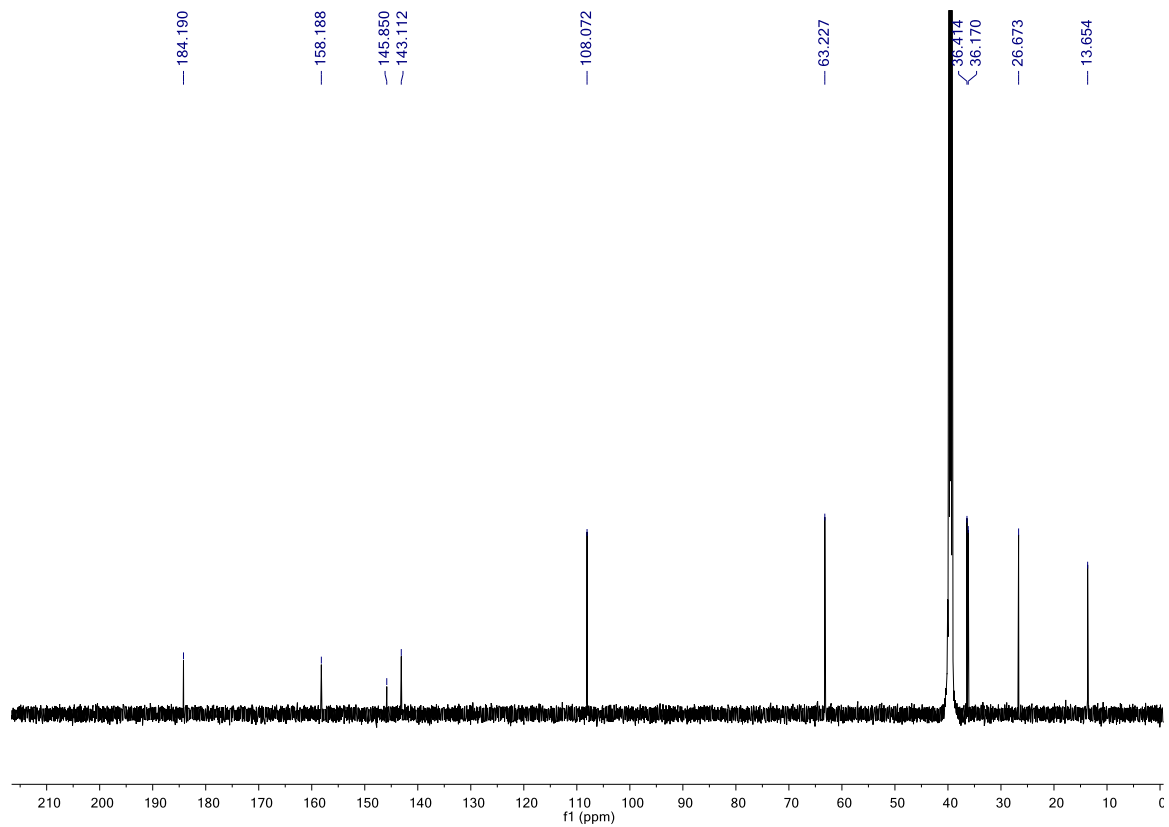

Figure S41.  $^{13}\text{C}$  Spectrum of 7 in  $\text{DMSO-}d_6$

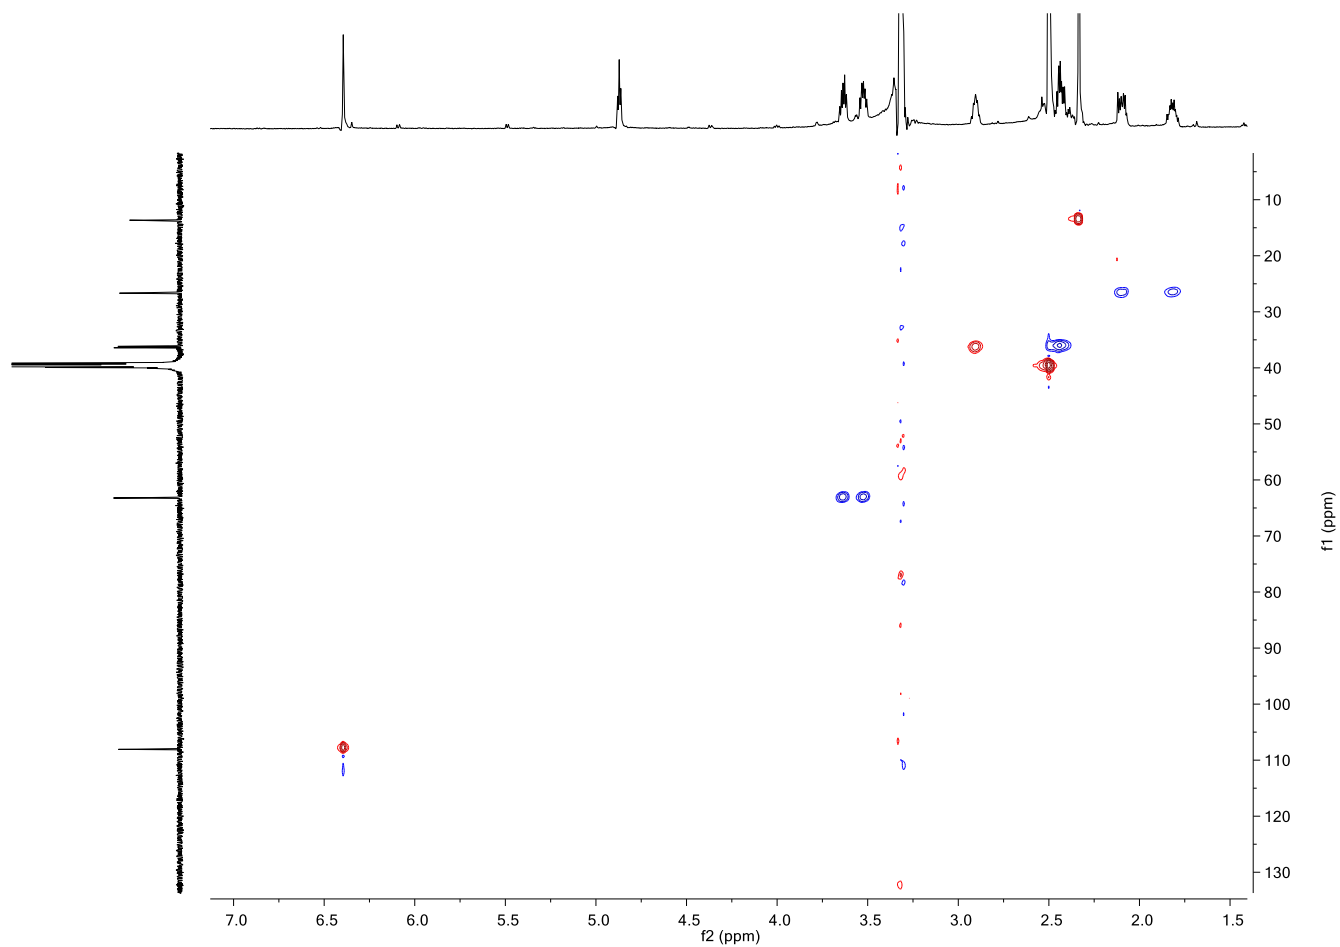

Figure S42. HSQC Spectrum of 7 in  $\text{DMSO-}d_6$

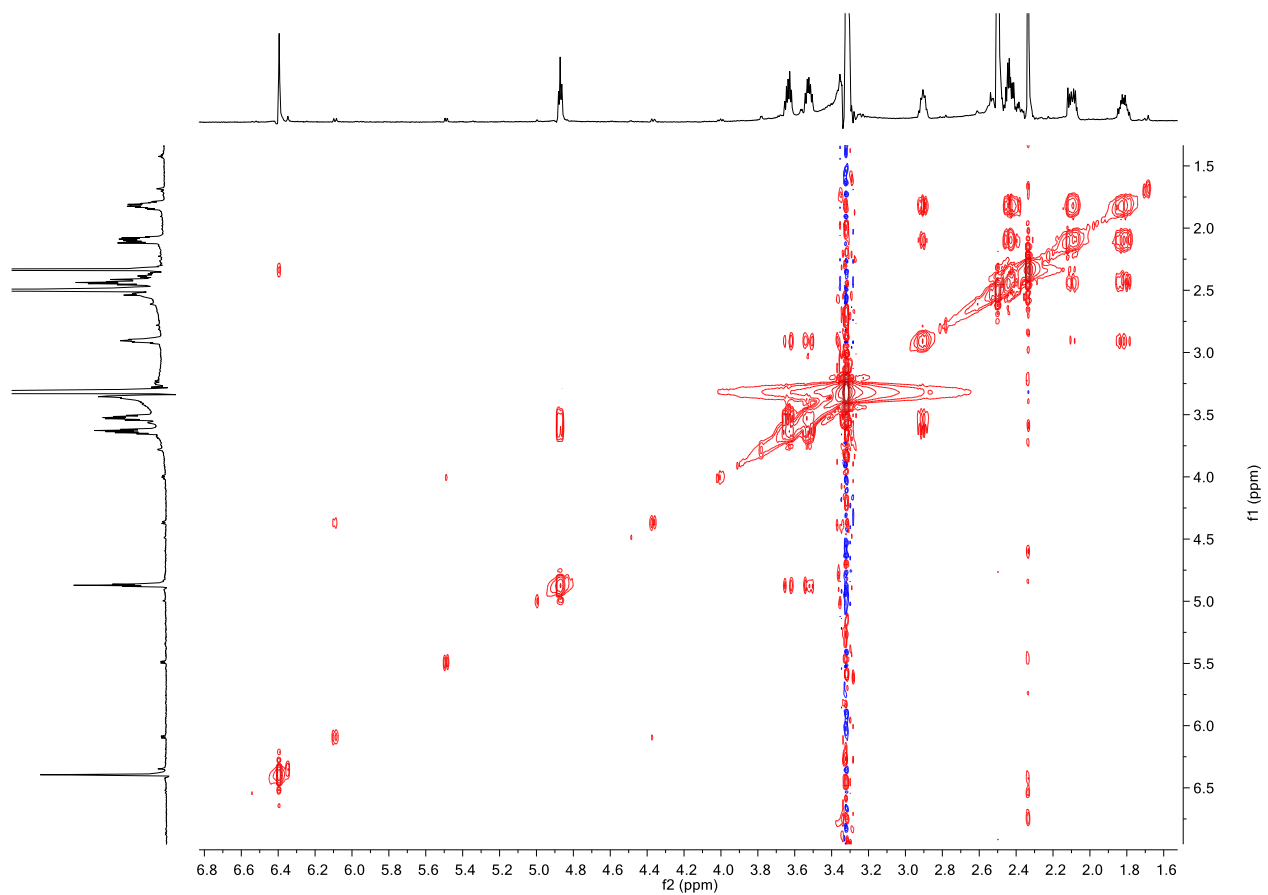

Figure S43. COSY Spectrum of **7** in DMSO- $d_6$

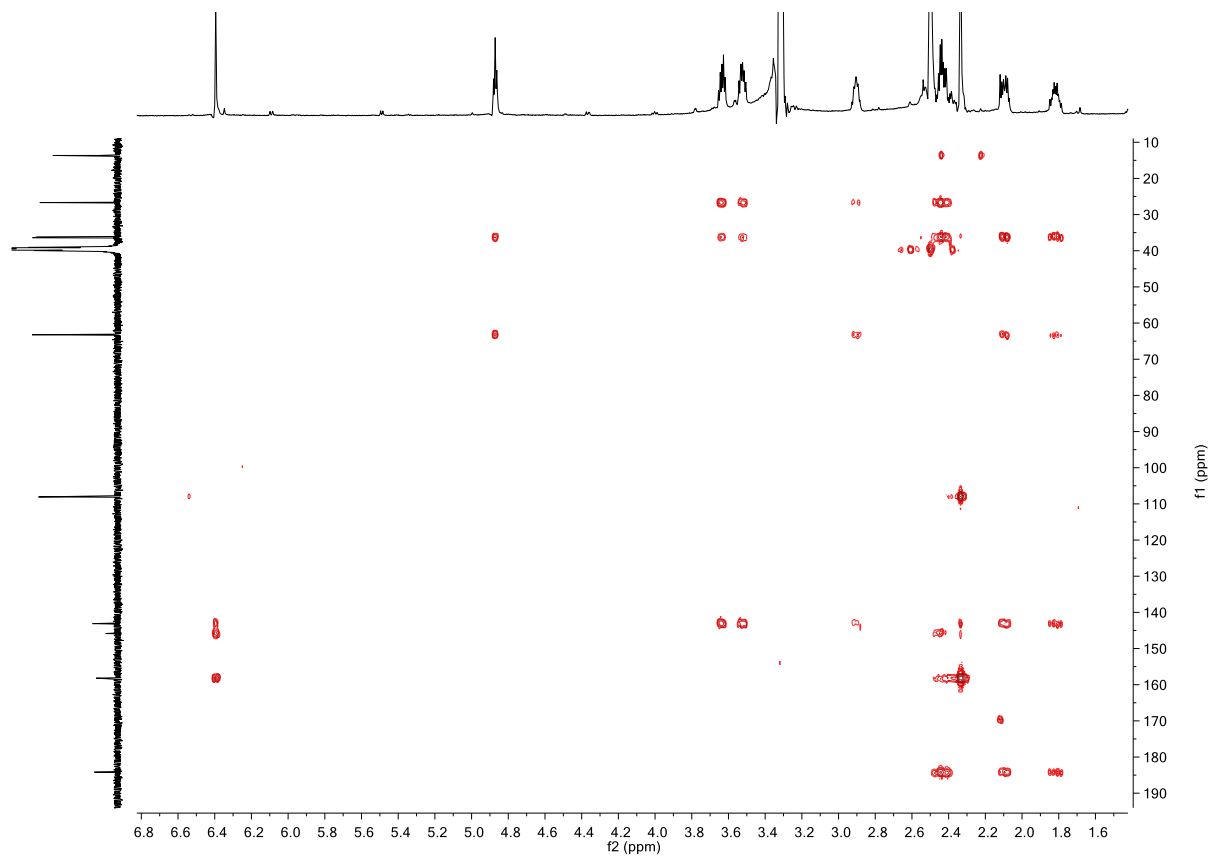

Figure S44. HMBC ( $J_{\text{HC}} = 8$  Hz) Spectrum of **7** in DMSO- $d_6$

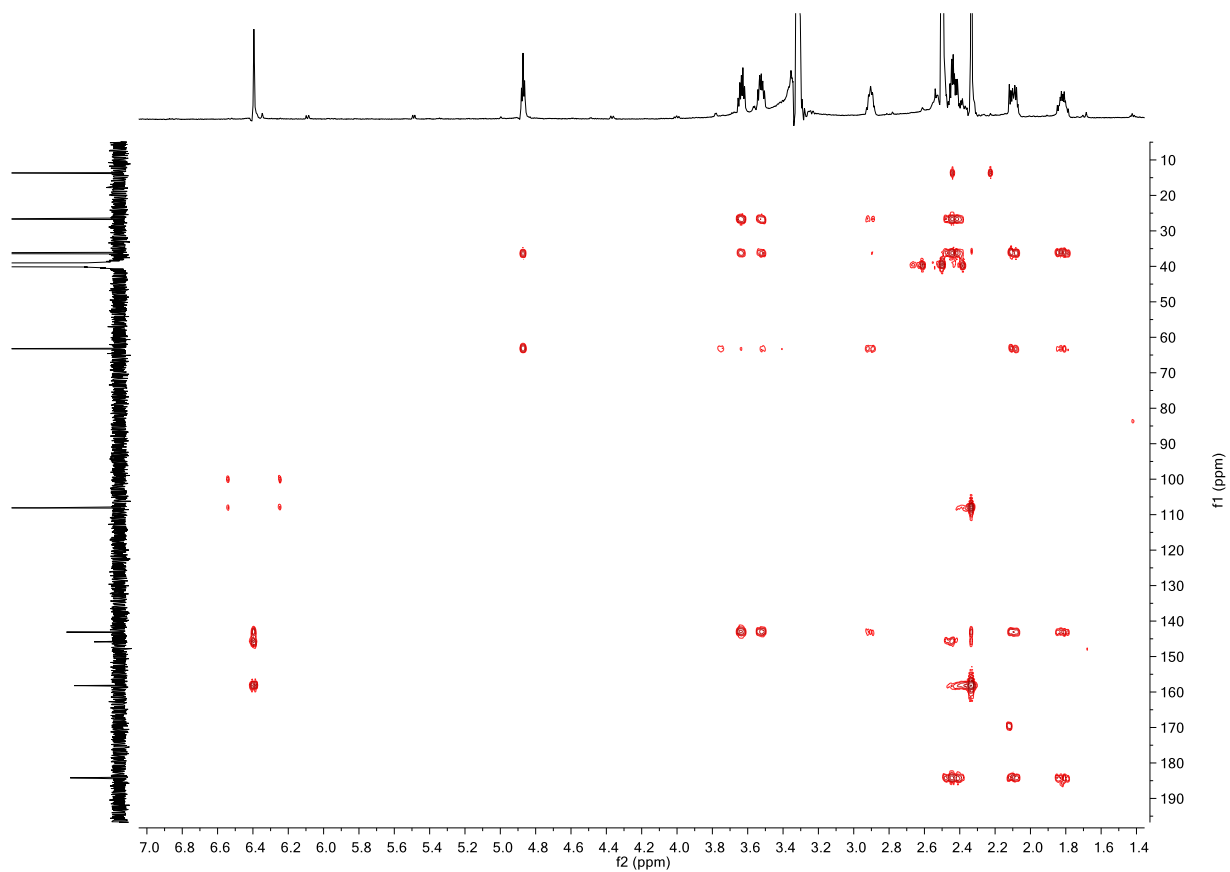

Figure S45. HMBC ( $J_{\text{HC}} = 3 \text{ Hz}$ ) Spectrum of **7** in DMSO-*d*<sub>6</sub>

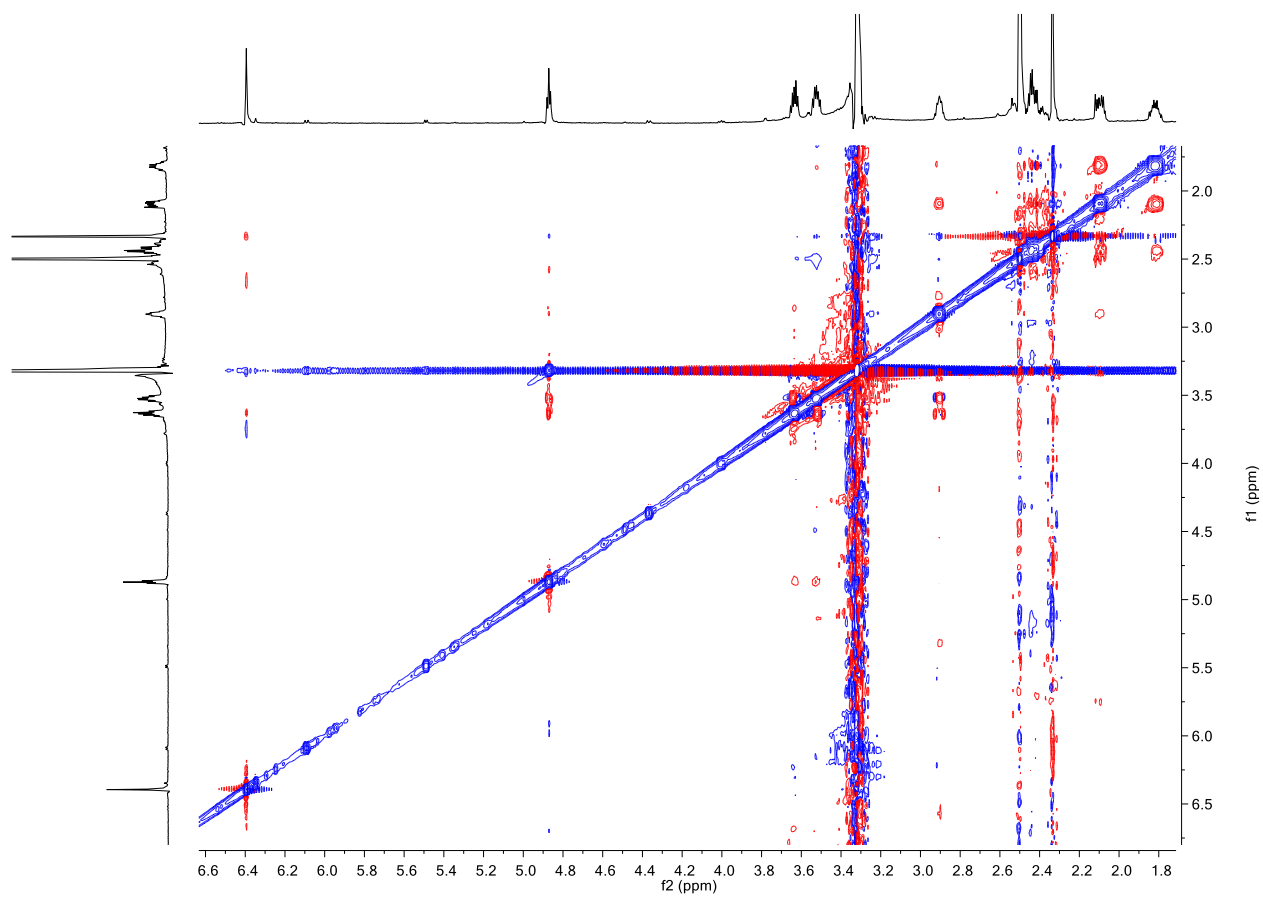

Figure S46. 2D ROESY Spectrum of **7** in DMSO-*d*<sub>6</sub>

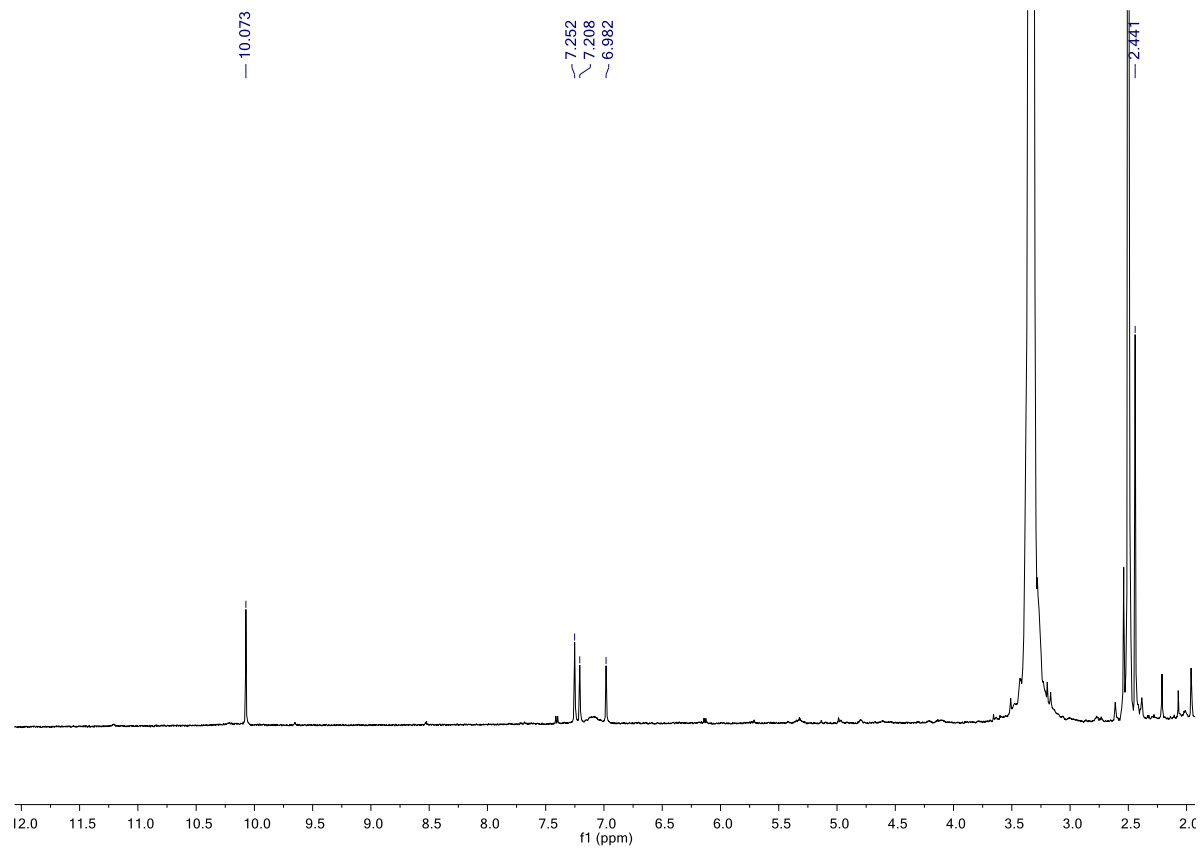

Figure S47.  $^1\text{H}$  Spectrum of **8** in  $\text{DMSO-}d_6$

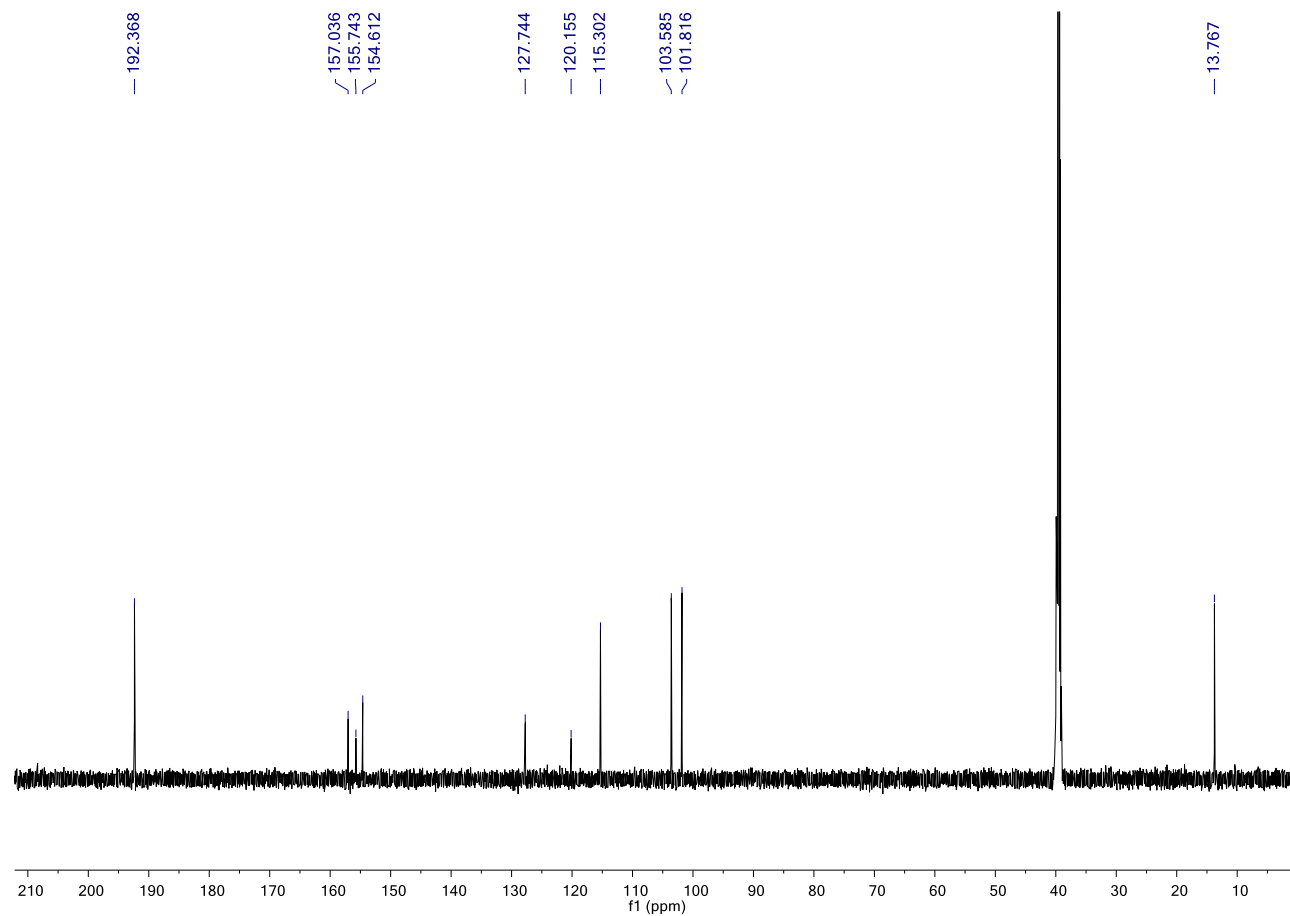

Figure S48.  $^{13}\text{C}$  Spectrum of **8** in  $\text{DMSO-}d_6$

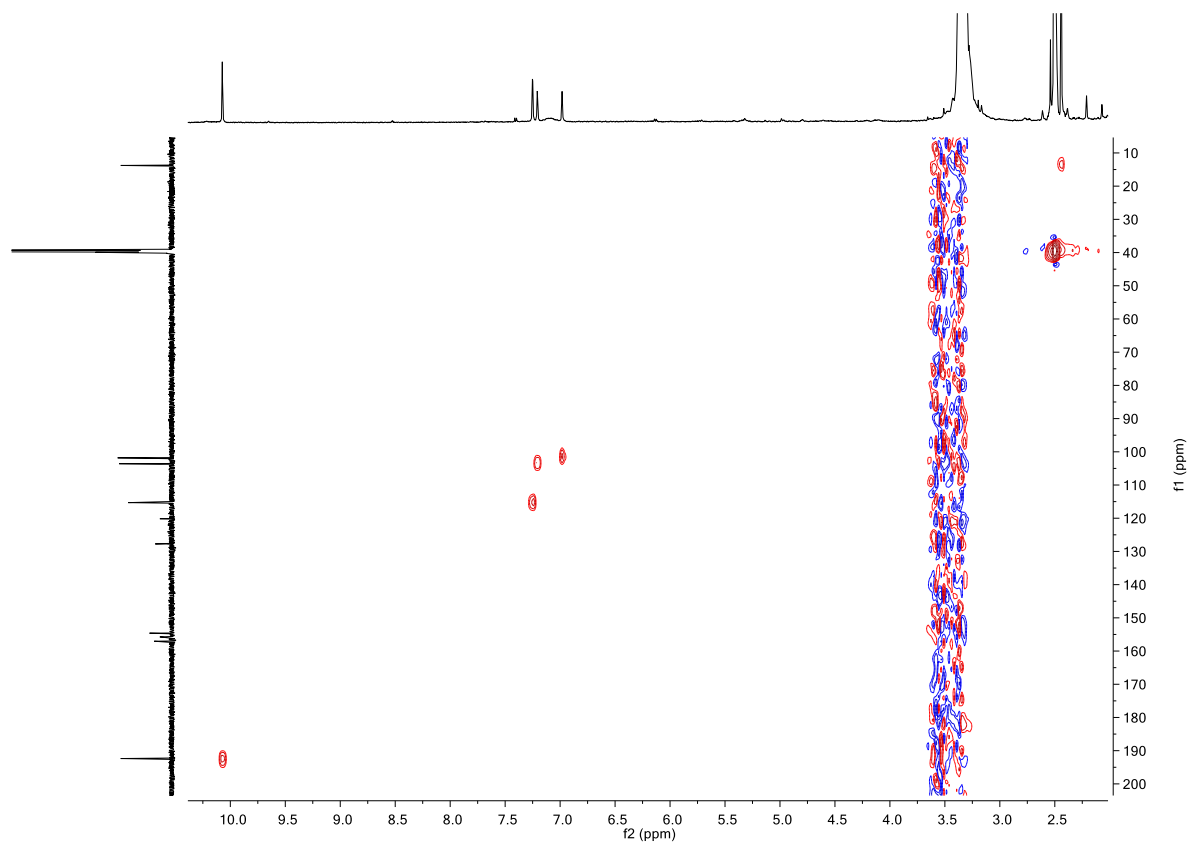

Figure S49. HSQC Spectrum of **8** in DMSO- $d_6$

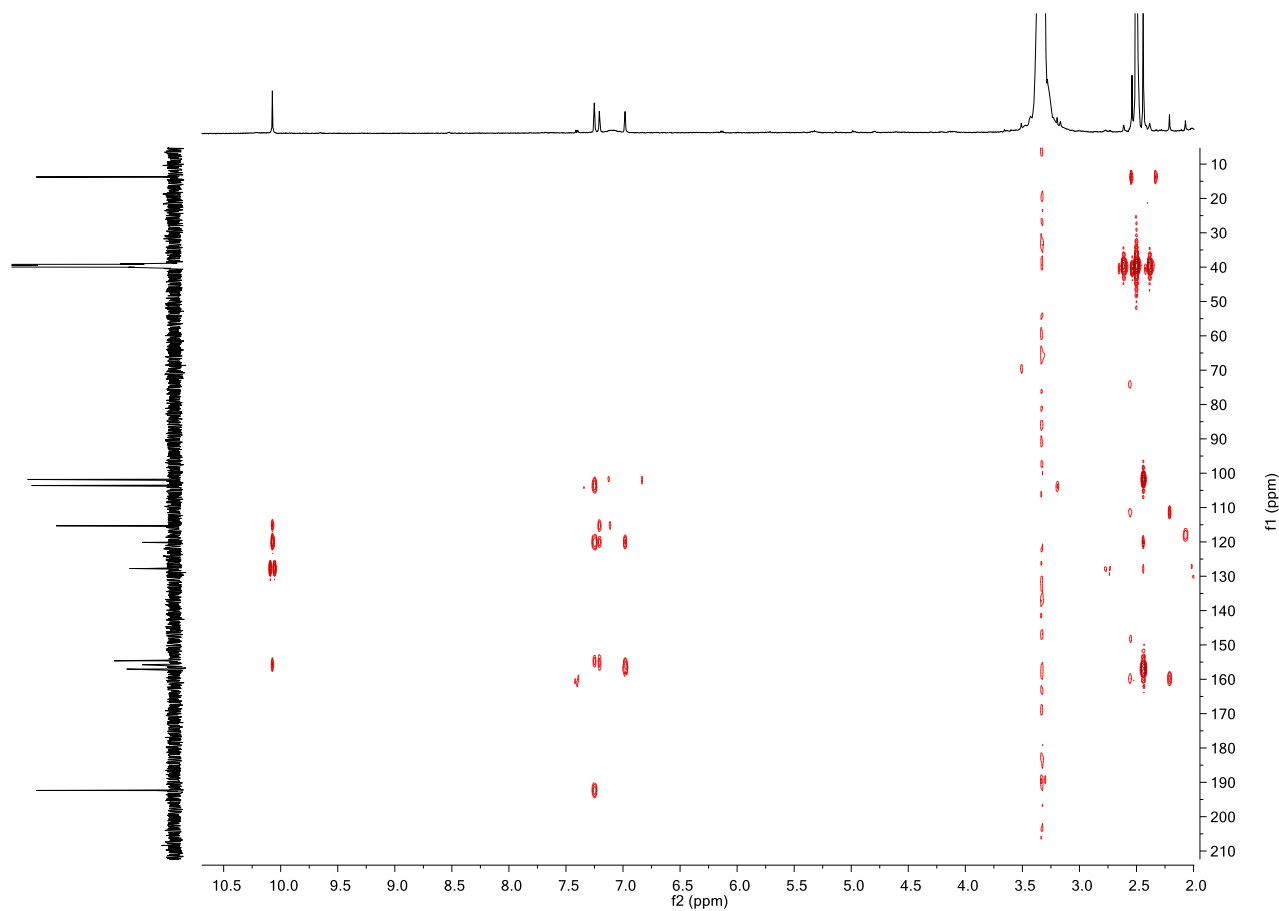

Figure S50. HMBC ( $J_{\text{HC}} = 8$  Hz) Spectrum of **8** in DMSO- $d_6$

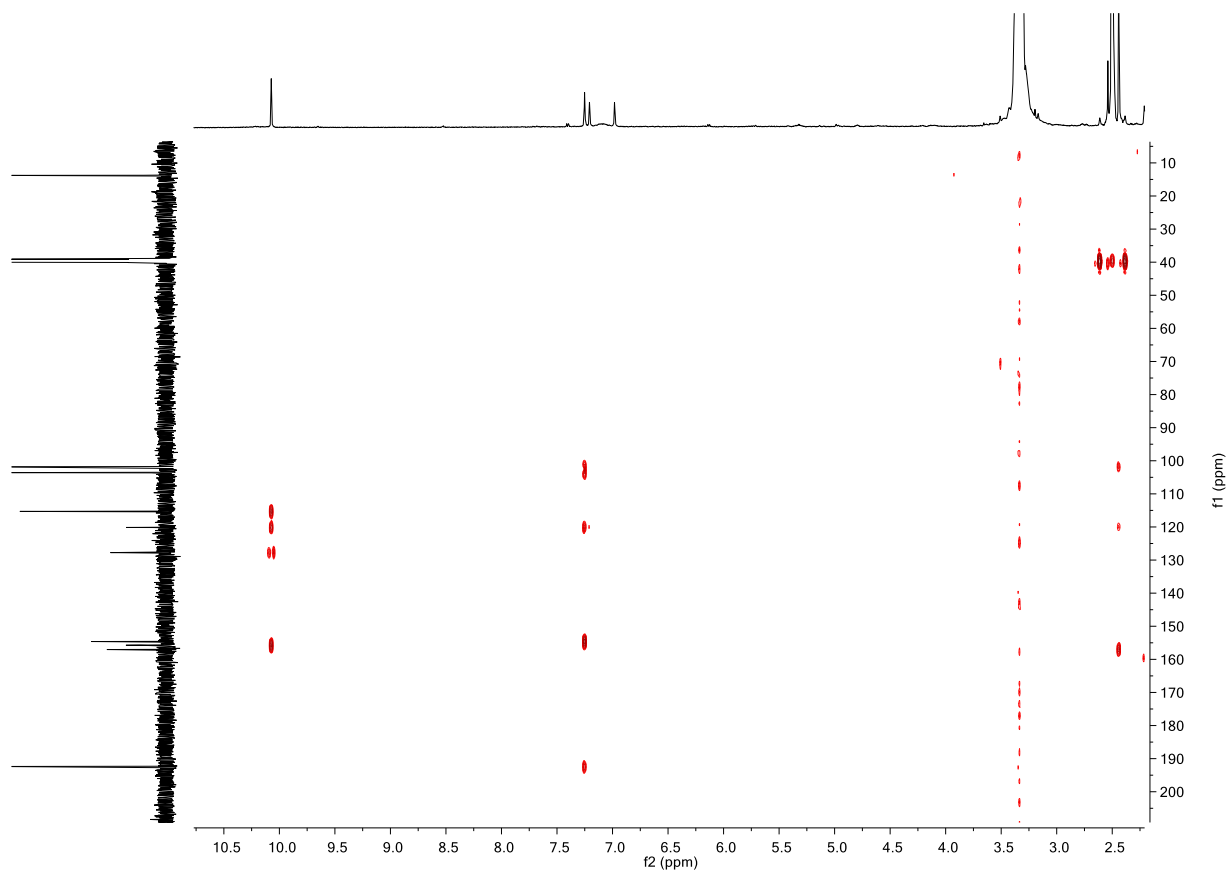

Figure S51. HMBC ( $J_{\text{HC}} = 2 \text{ Hz}$ ) Spectrum of **8** in DMSO- $d_6$

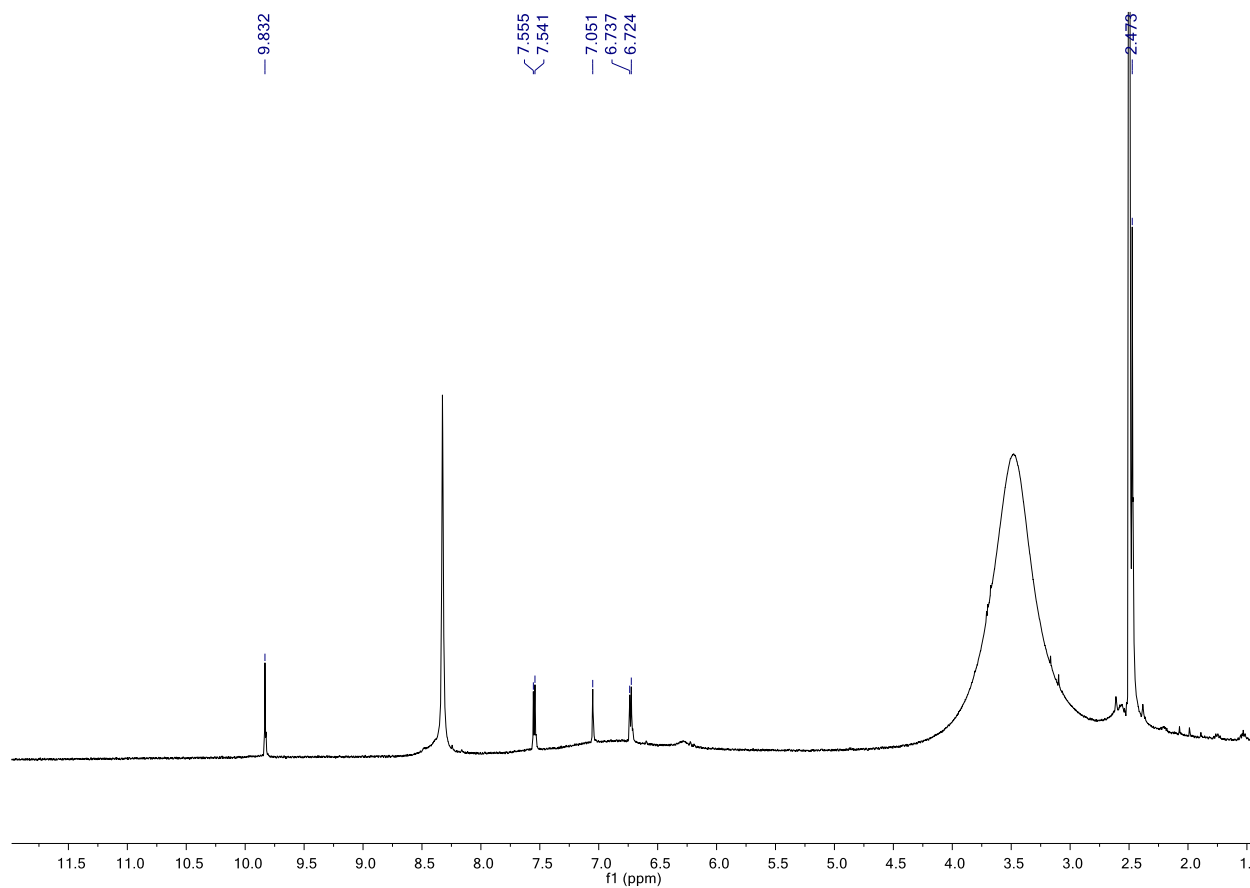

Figure S52.  $^1\text{H}$  Spectrum of **9** in DMSO- $d_6$

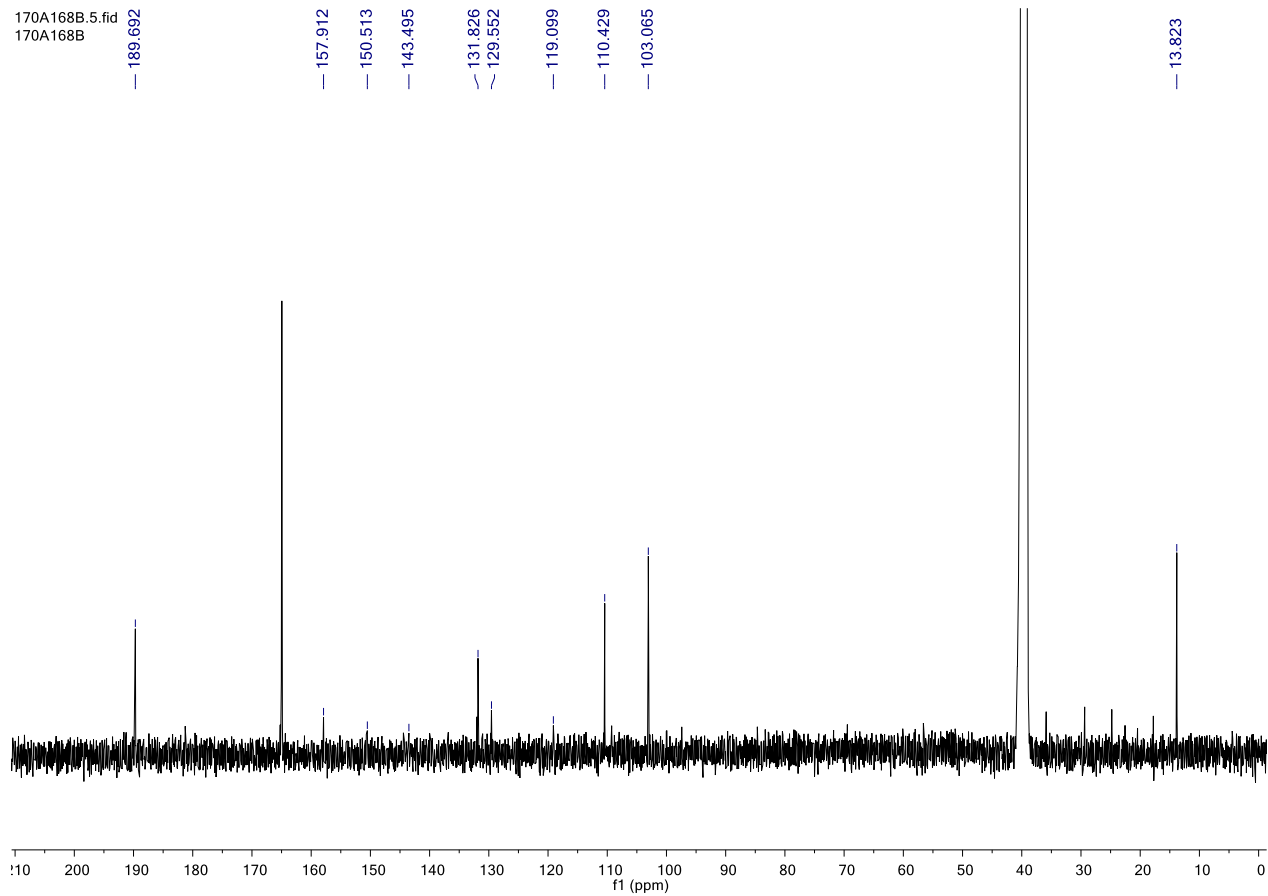

Figure S53.  $^{13}\text{C}$  Spectrum of **9** in  $\text{DMSO-}d_6$

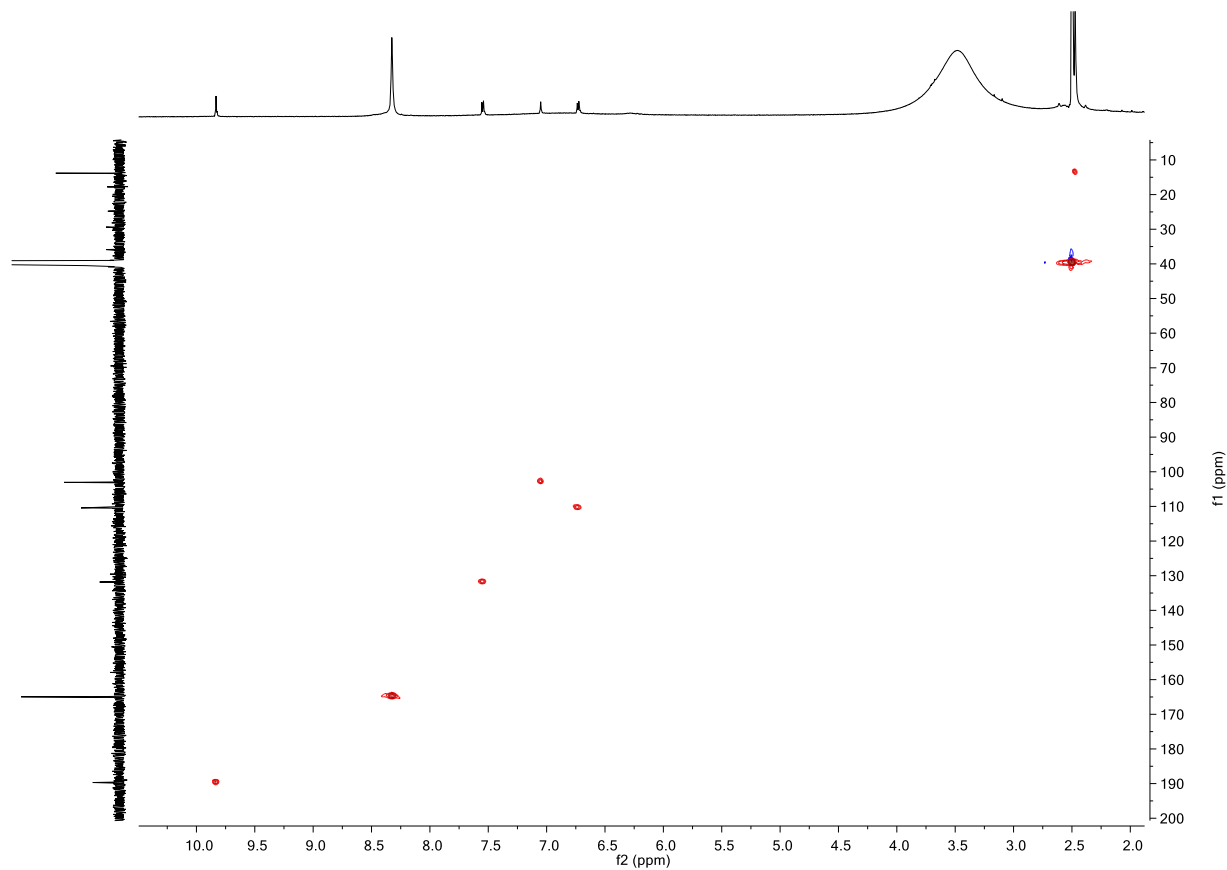

Figure S54. HSQC Spectrum of **9** in  $\text{DMSO-}d_6$



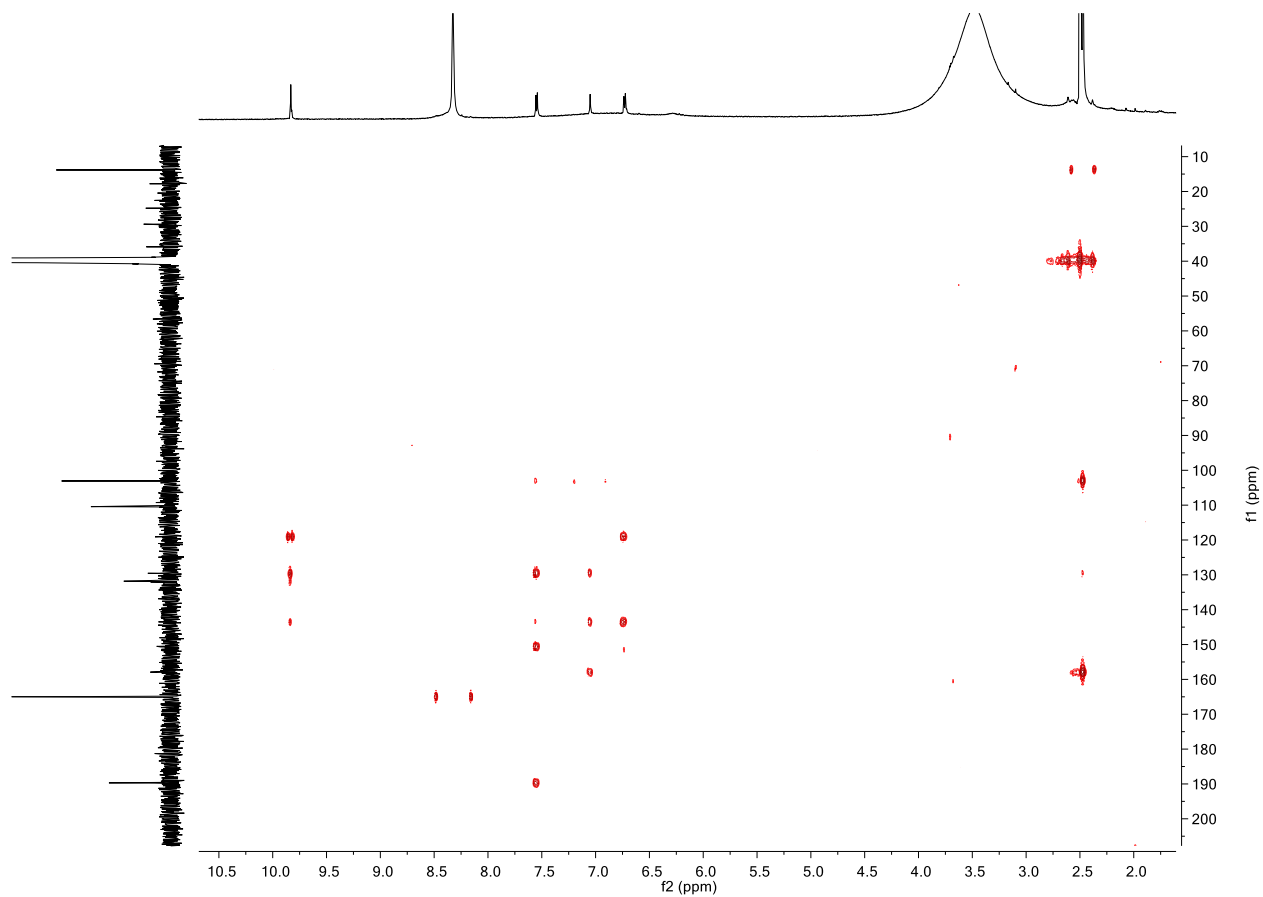

Figure S55. HMBC Spectrum of **9** in DMSO- $d_6$

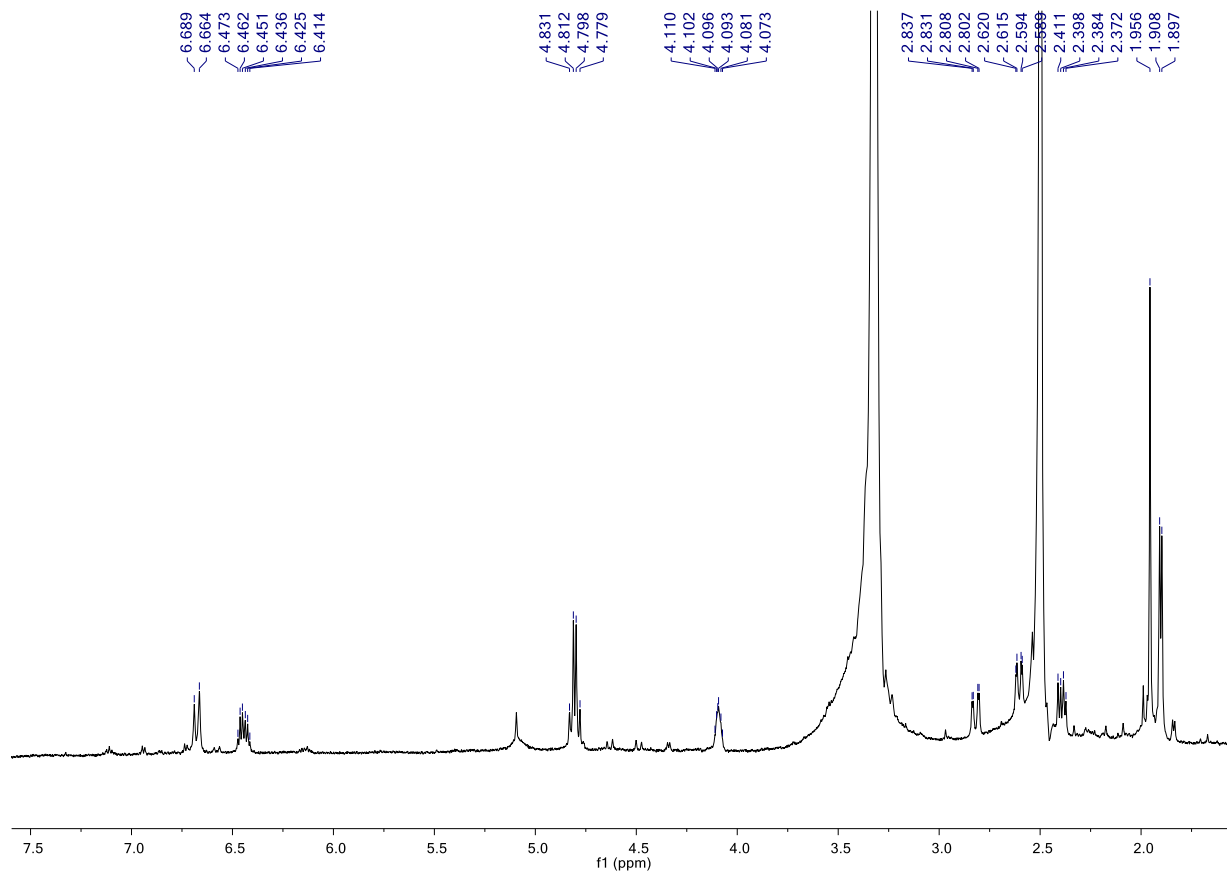

Figure S56.  $^1\text{H}$  Spectrum of **10** in DMSO- $d_6$

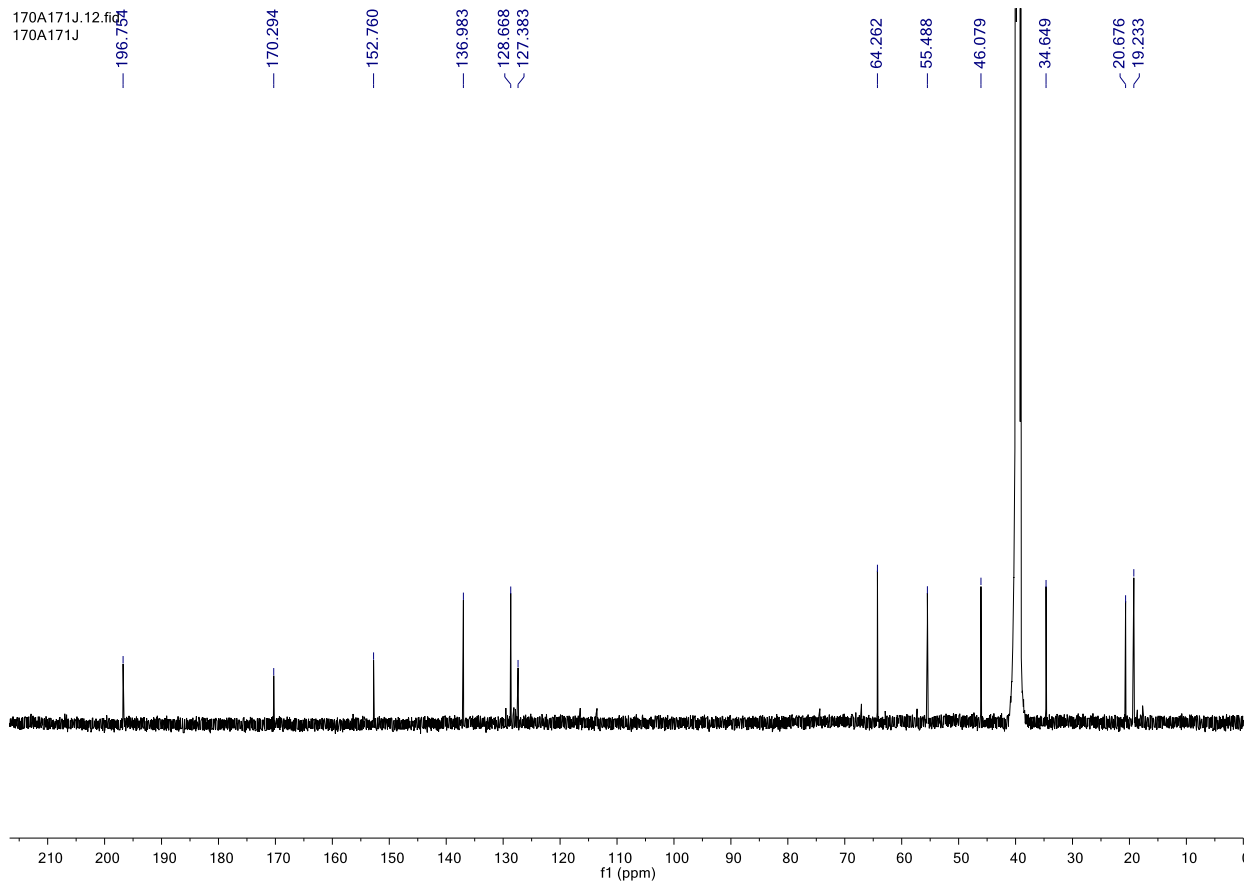

**Figure S57.**  $^{13}\text{C}$  Spectrum of **10** in  $\text{DMSO-}d_6$

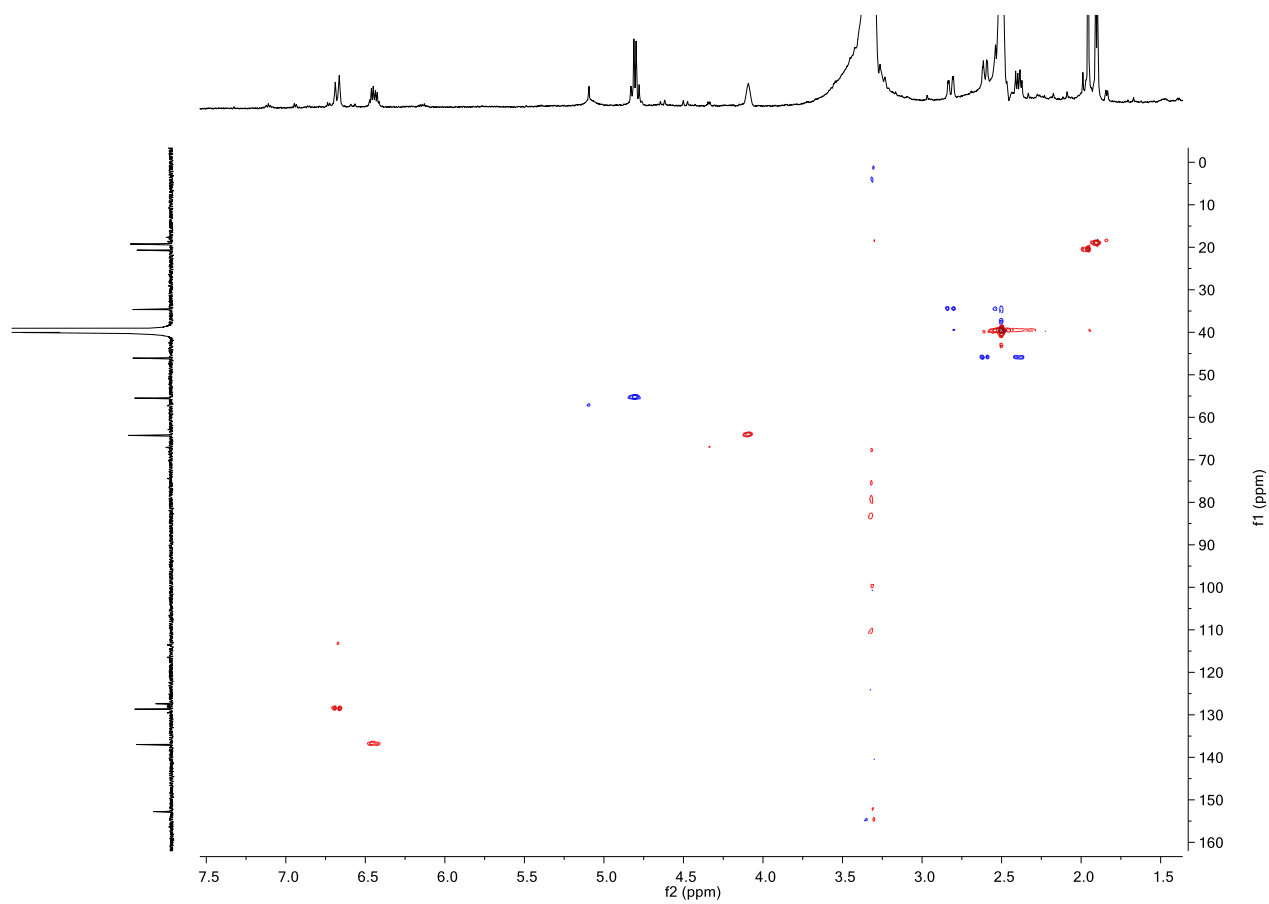

**Figure S58.** HSQC Spectrum of **10** in  $\text{DMSO-}d_6$

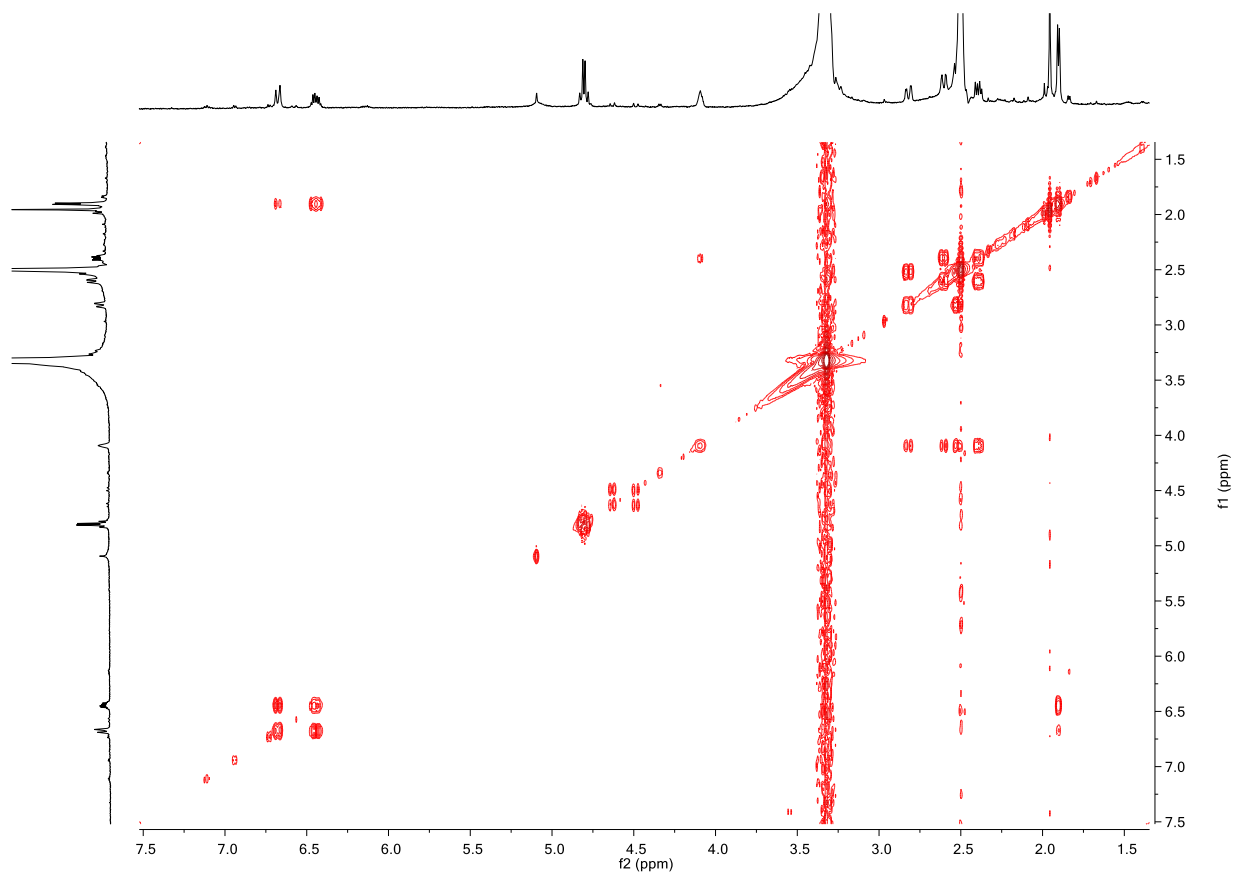

Figure S59. COSY Spectrum of **10** in DMSO- $d_6$

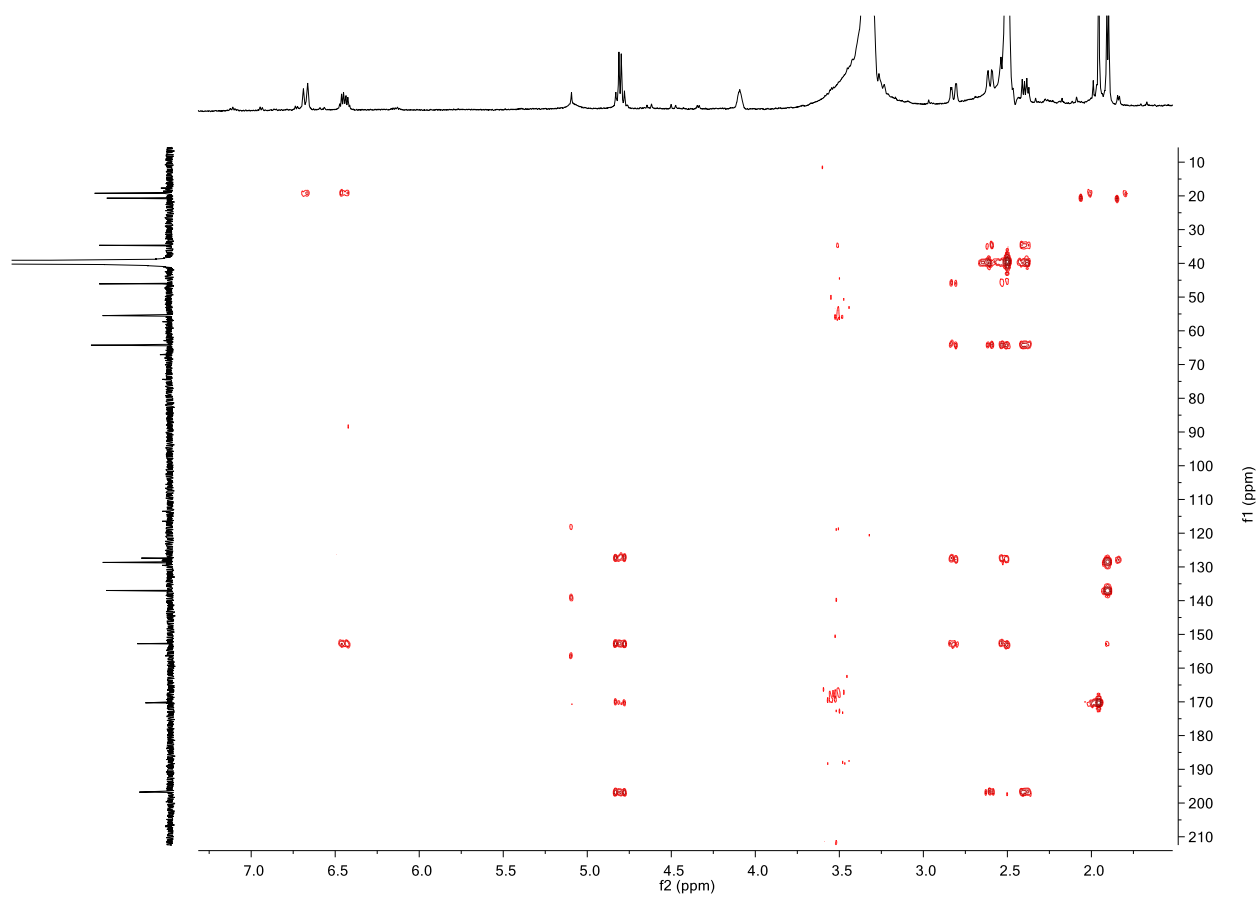

Figure S60. HMBC Spectrum of **10** in DMSO- $d_6$

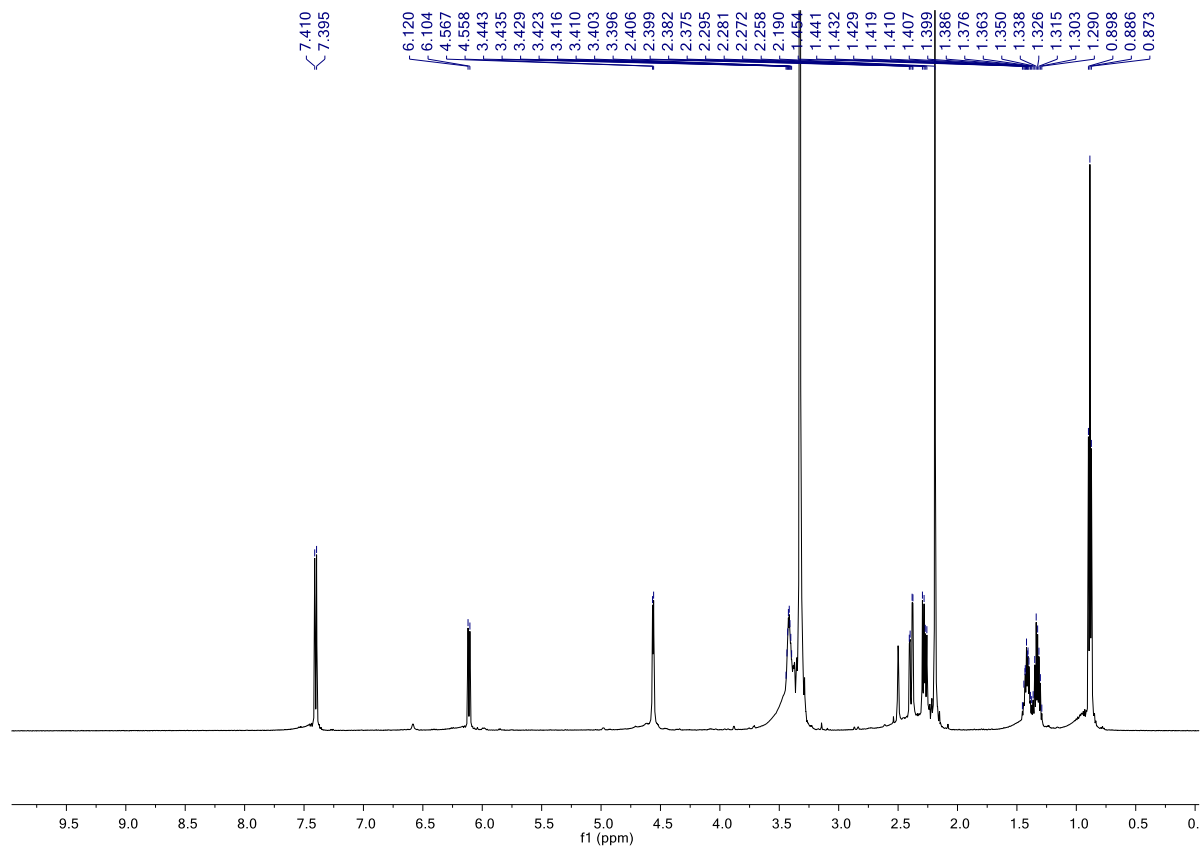

**Figure S61.**  $^1\text{H}$  Spectrum of **11** in  $\text{DMSO-}d_6$

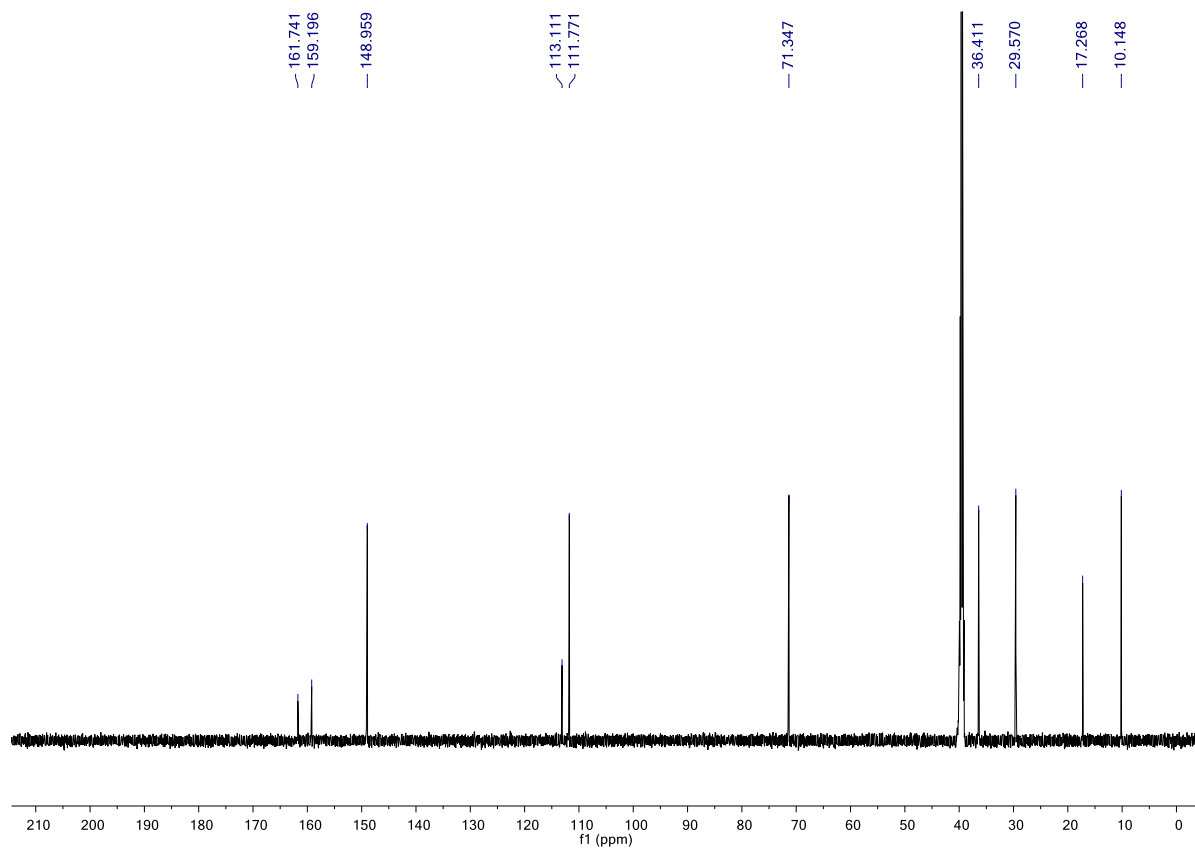

**Figure S62.**  $^{13}\text{C}$  Spectrum of **11** in  $\text{DMSO-}d_6$

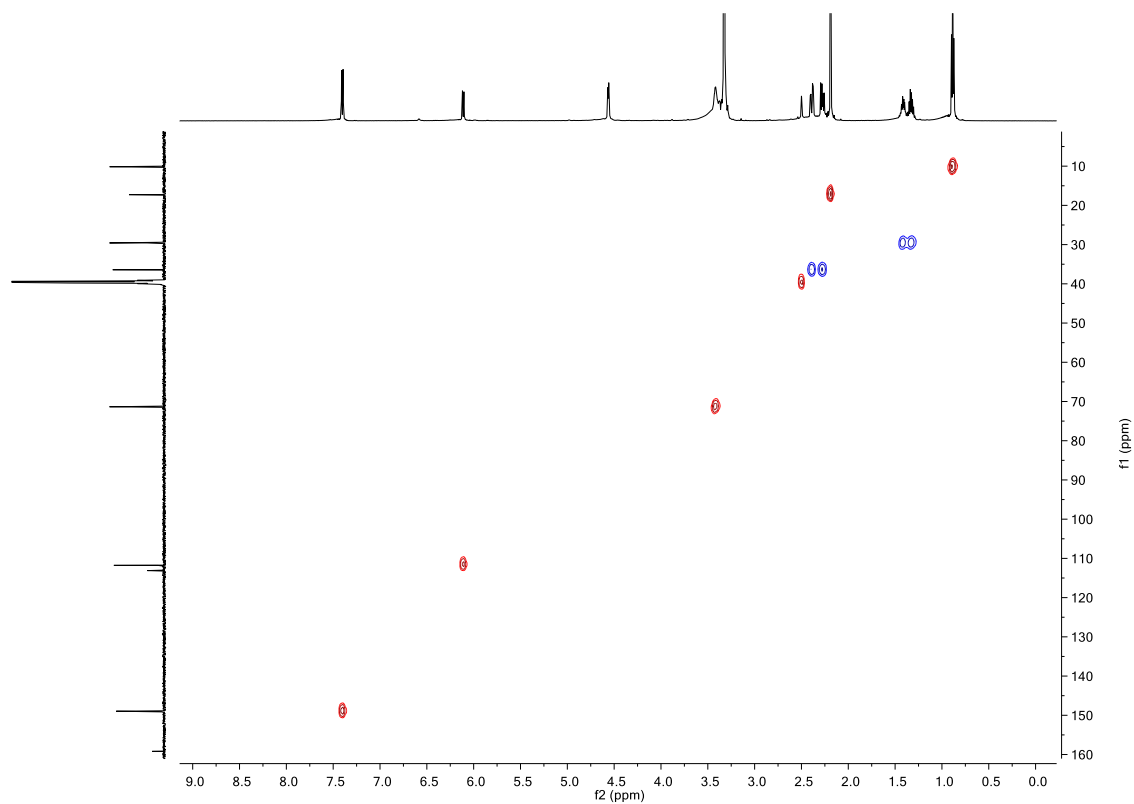

Figure S63. HSQC Spectrum of **11** in DMSO-*d*<sub>6</sub>

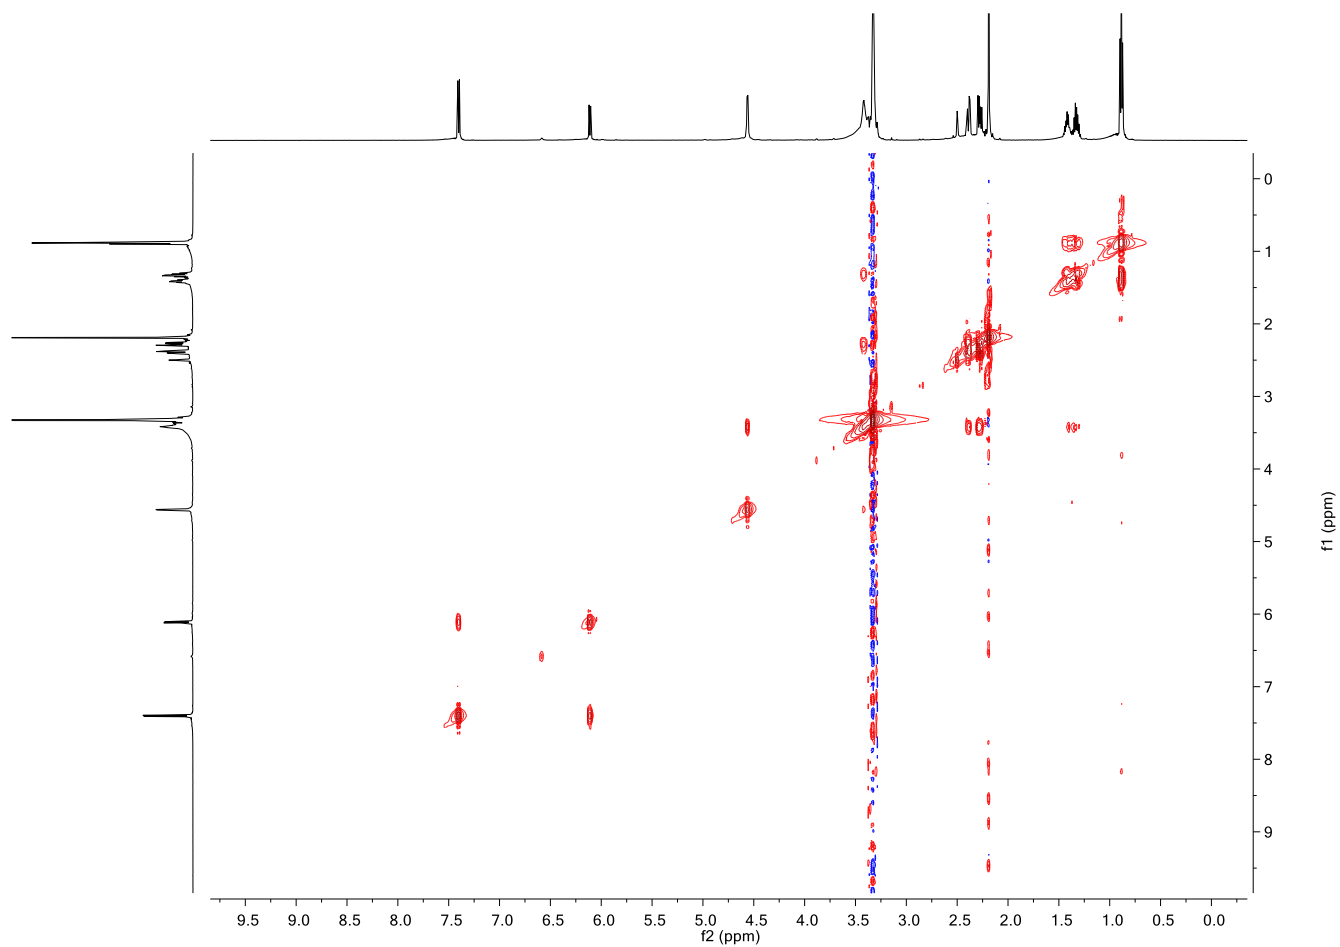

Figure S64. COSY Spectrum of **11** in DMSO-*d*<sub>6</sub>

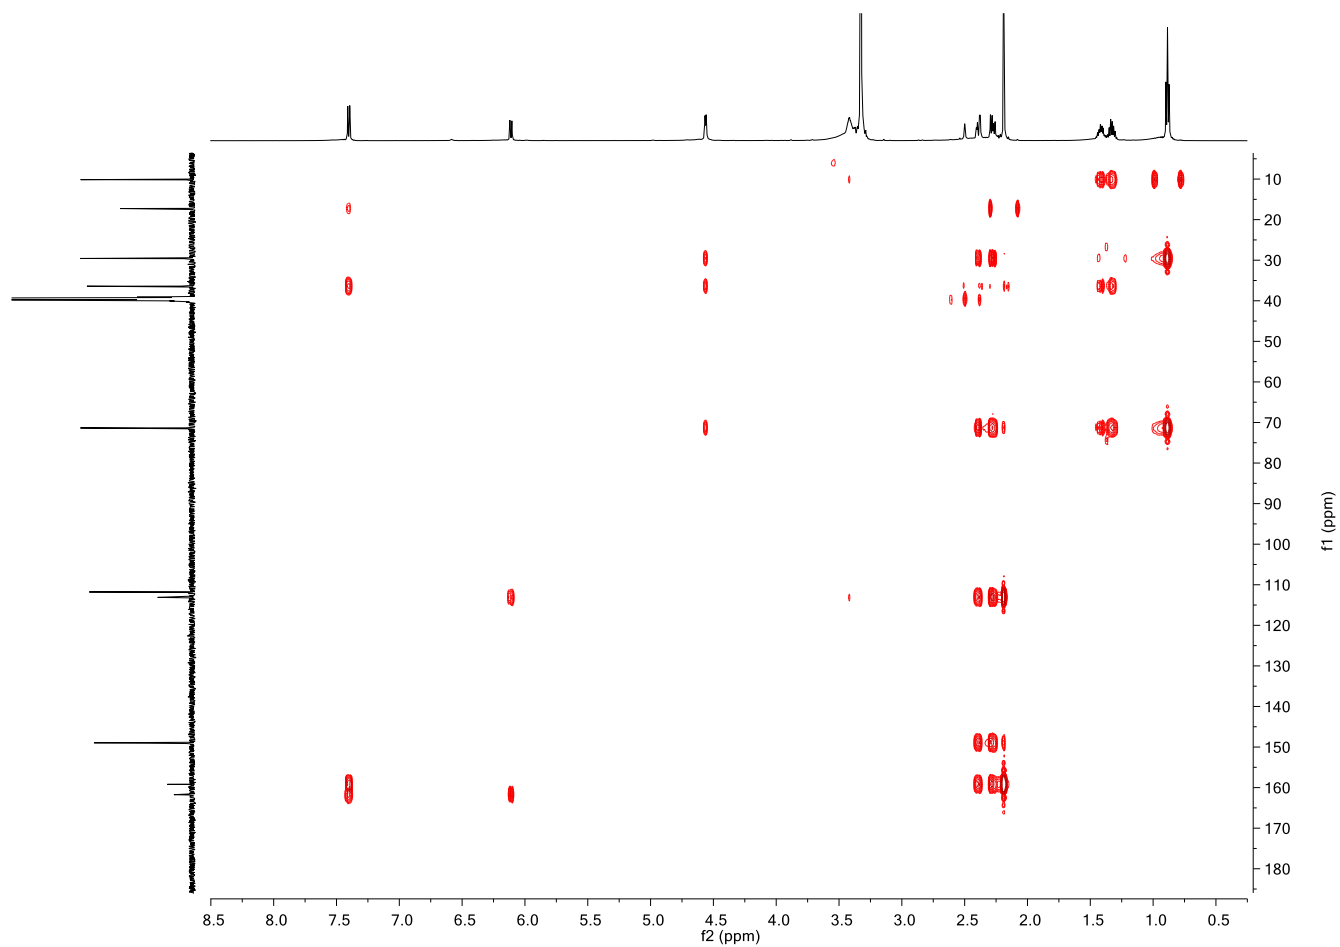

Figure S65. HMBC Spectrum of **11** in DMSO- $d_6$

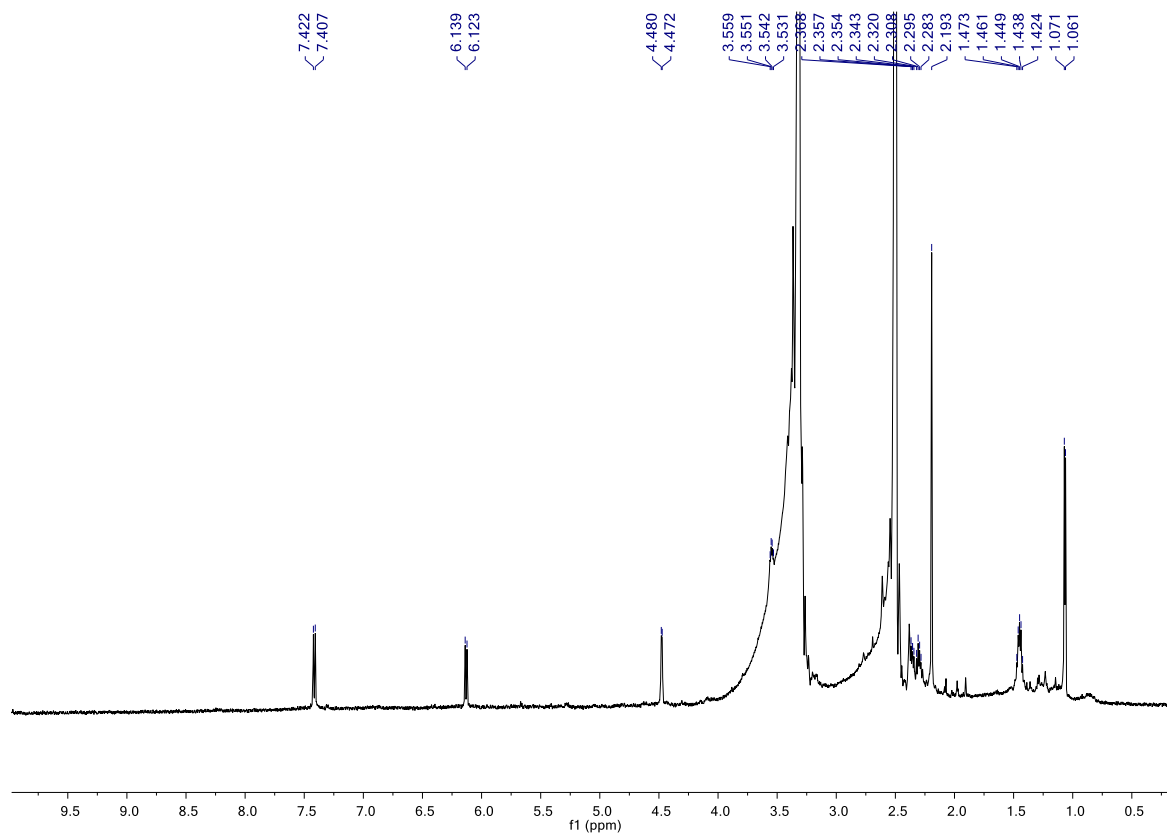

Figure S66.  $^1\text{H}$  Spectrum of **12** in DMSO- $d_6$

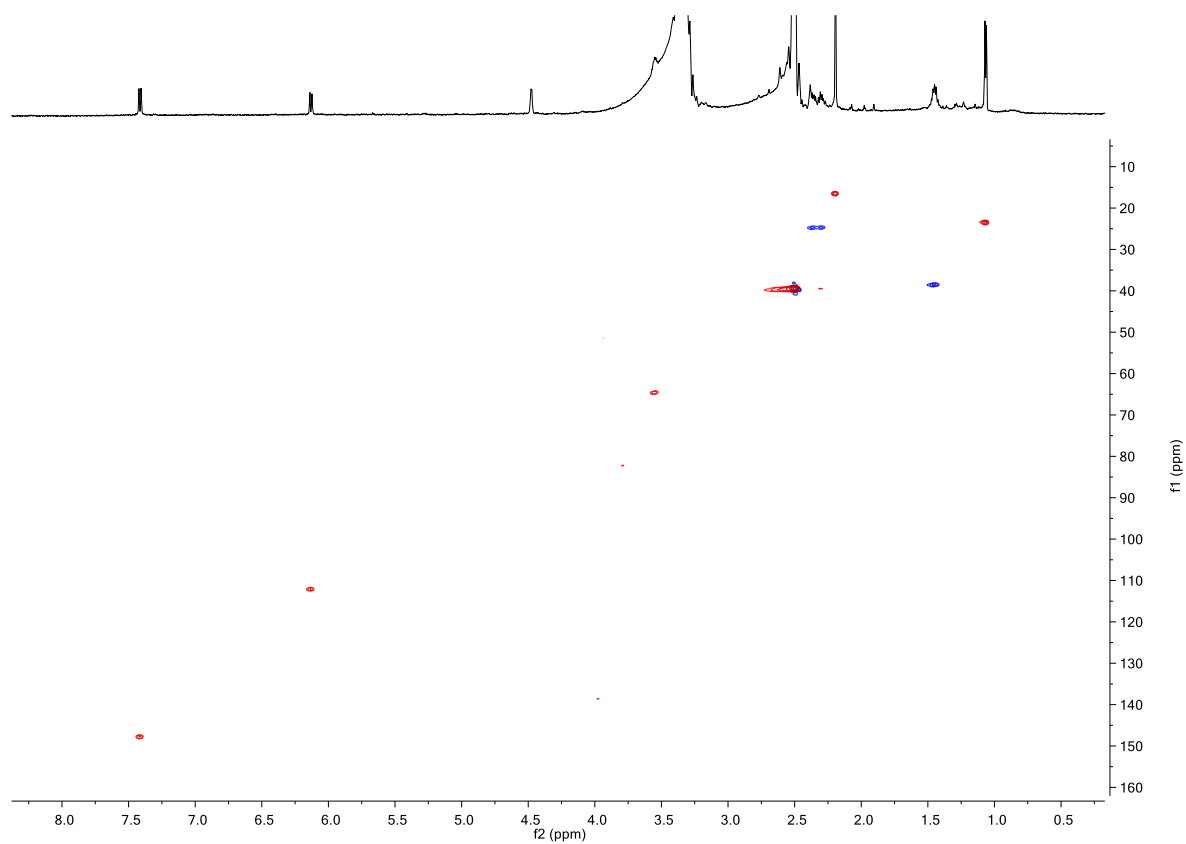

**Figure S67.** HSQC Spectrum of **12** in DMSO- $d_6$

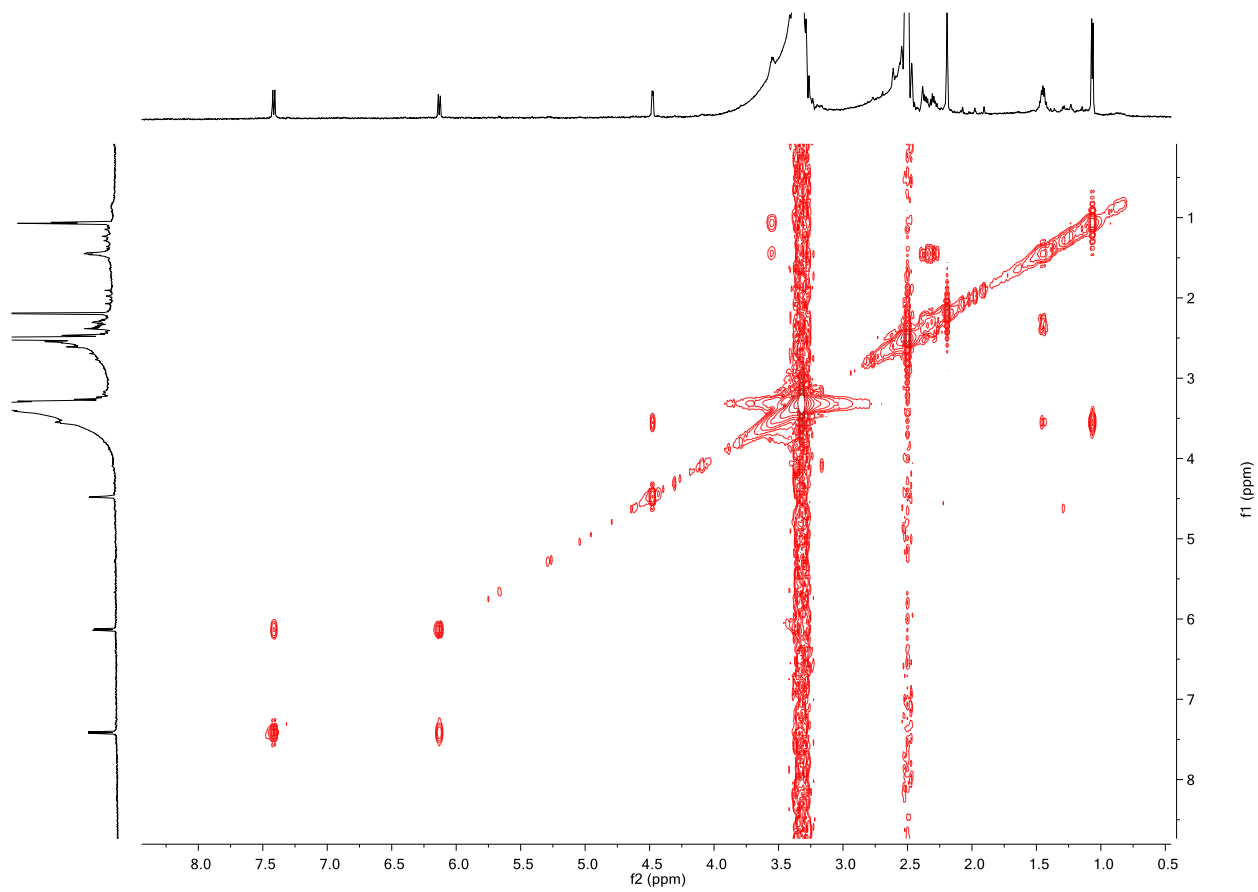

**Figure S68.** COSY Spectrum of **12** in DMSO- $d_6$

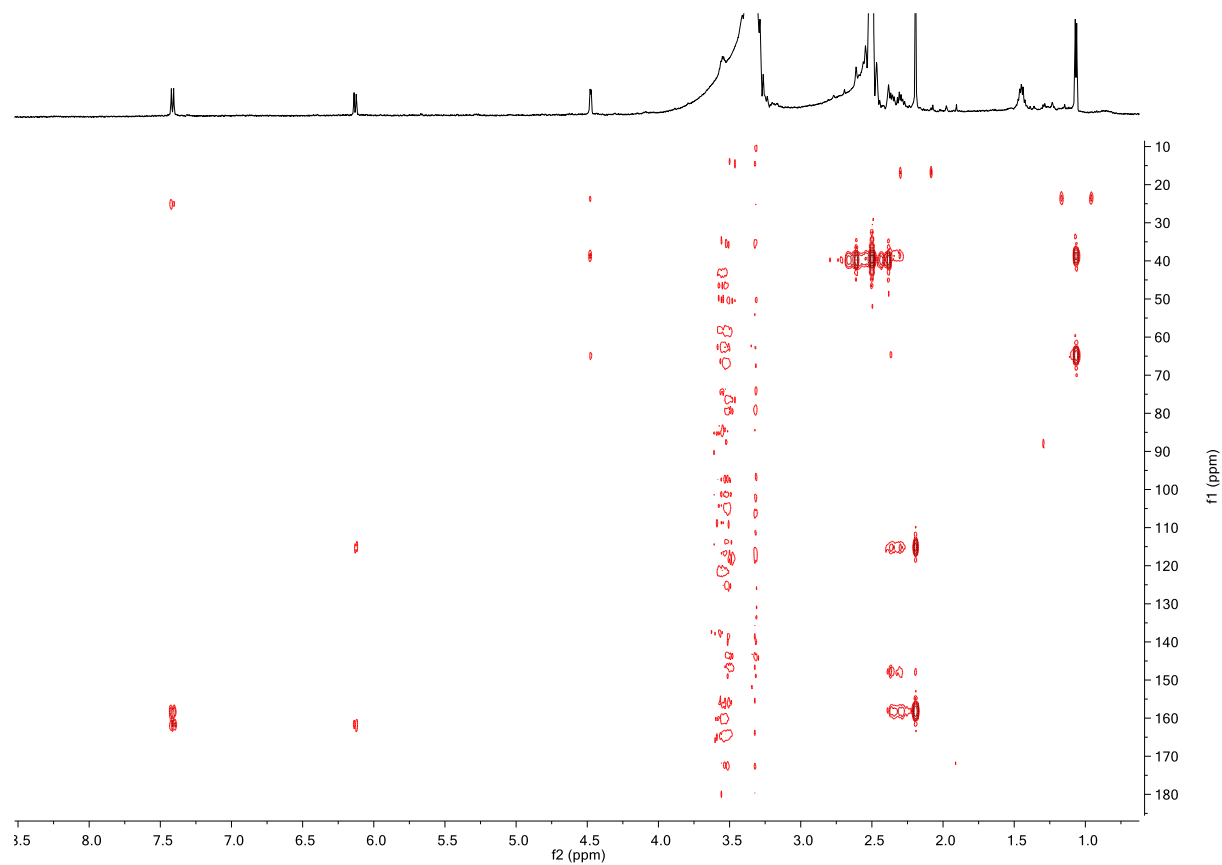

**Figure S69.** HMBC Spectrum of **12** in DMSO- $d_6$

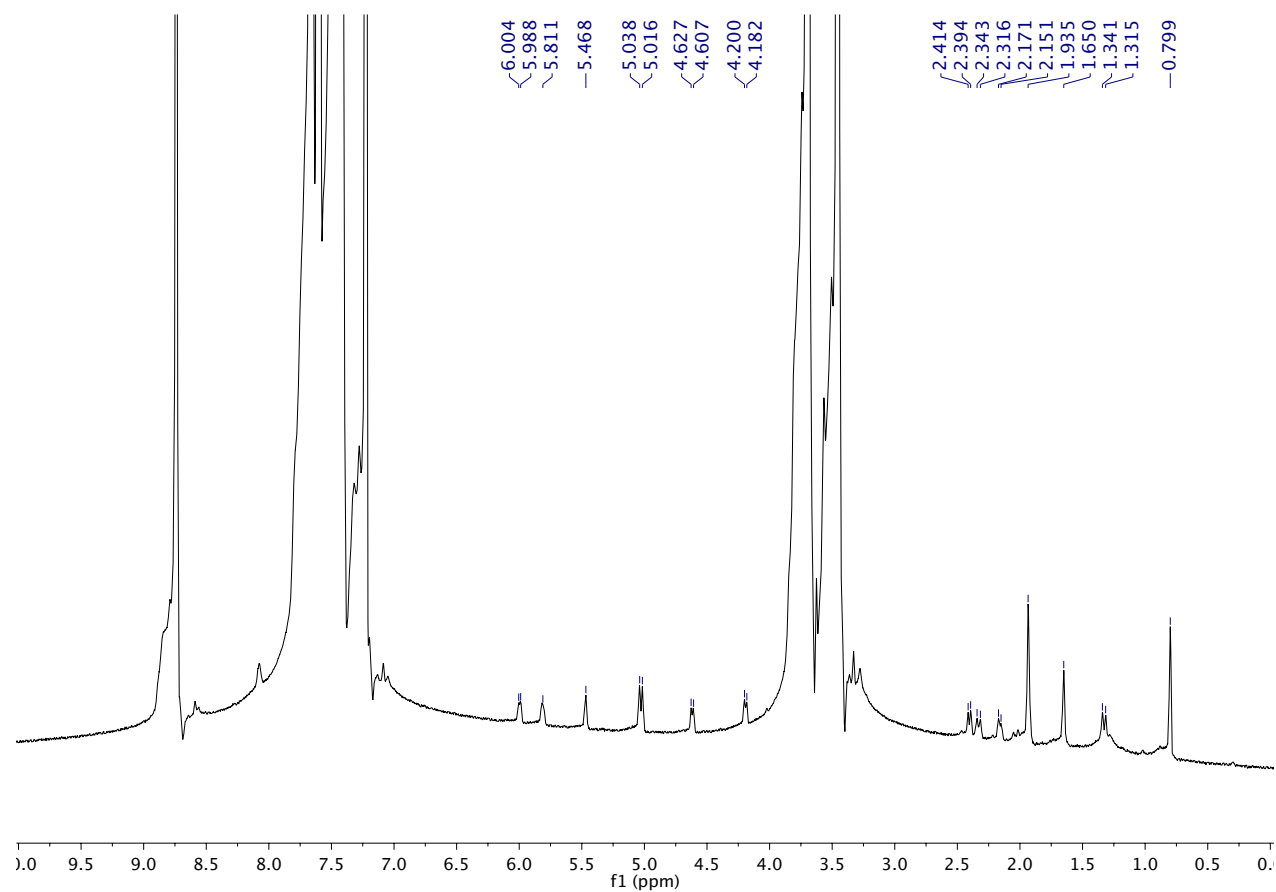

**Figure S70.**  $^1\text{H}$  Spectrum of (*S*)-MTPA Ester of **1** (**1a**) in Pyridine- $d_5$



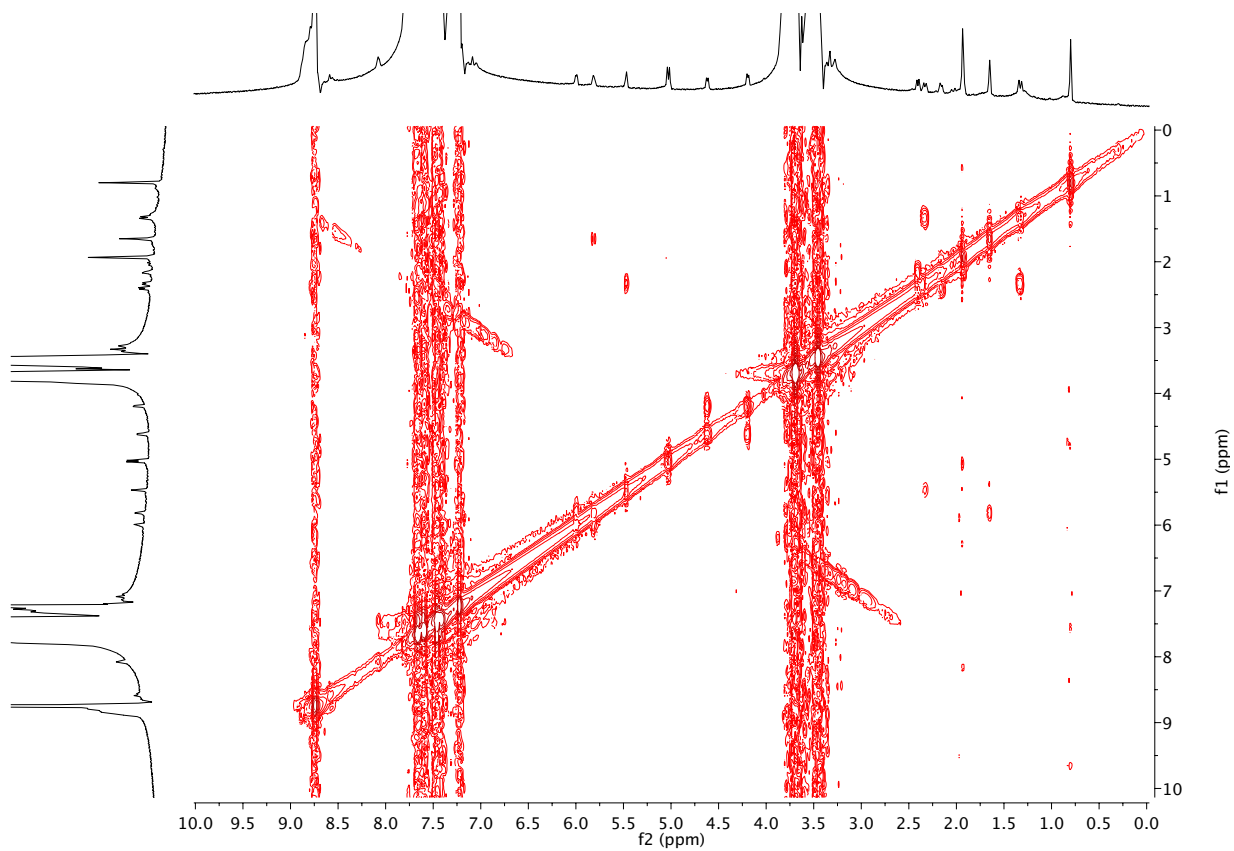

**Figure S71.** COSY Spectrum of (*S*)-MTPA Ester of **1** (**1a**) in Pyridine-*d*<sub>5</sub>

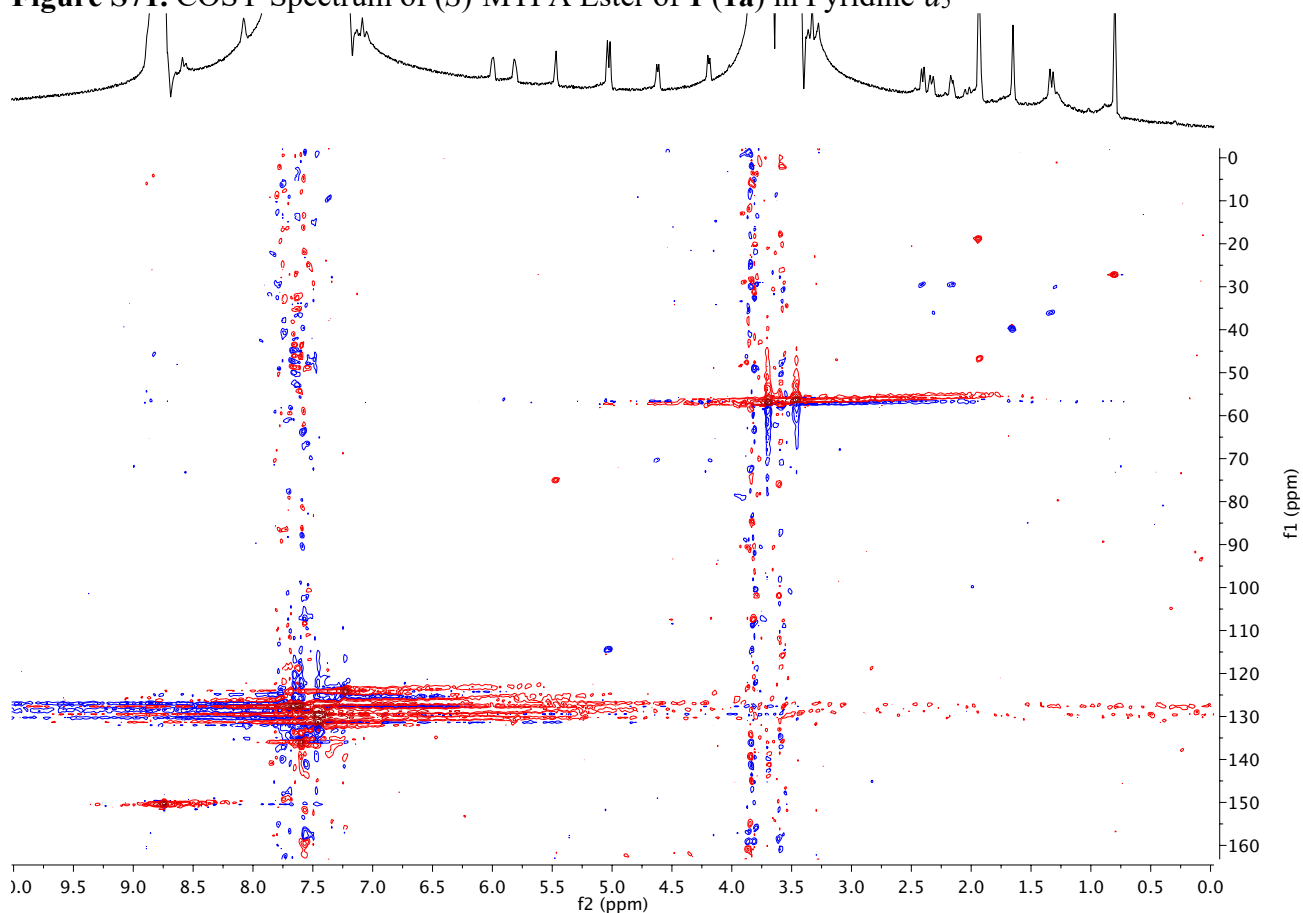

**Figure S72.** HSQC Spectrum of (*S*)-MTPA Ester of **1** (**1a**) in Pyridine-*d*<sub>5</sub>

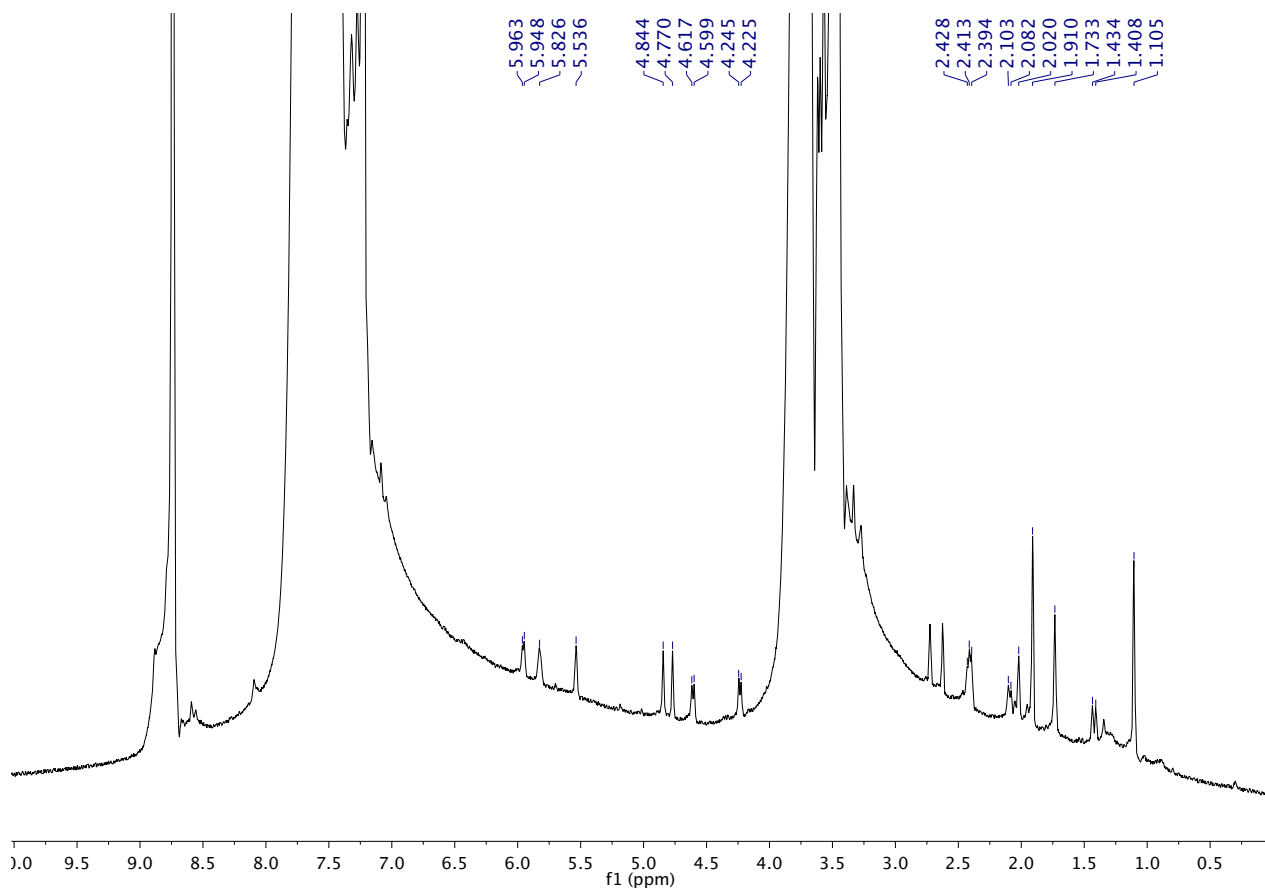

**Figure S73.**  $^1\text{H}$  Spectrum of (*R*)-MTPA Ester of **1** (**1b**) in Pyridine- $d_5$

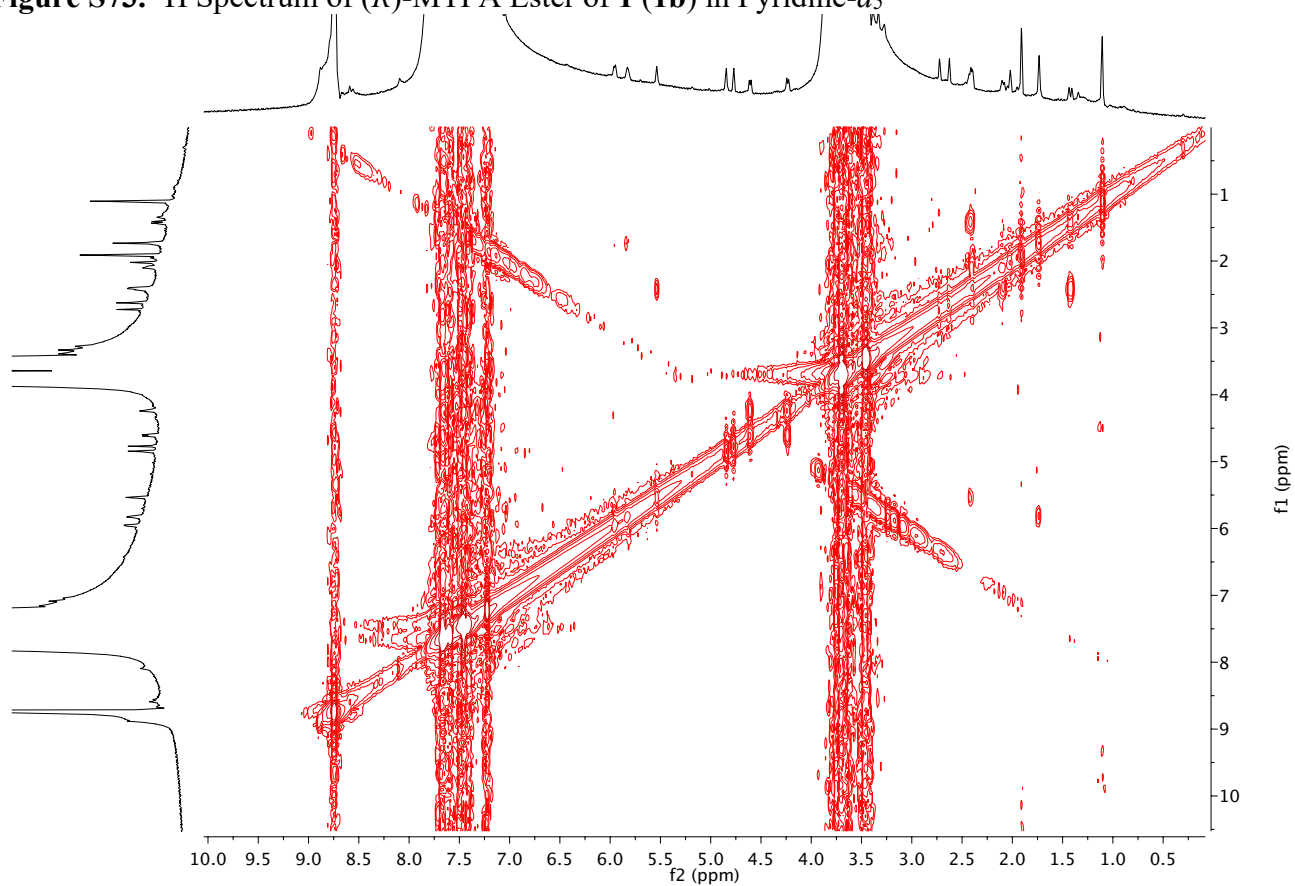

**Figure S74.** COSY Spectrum of (*R*)-MTPA Ester of **1** (**1b**) in Pyridine- $d_5$

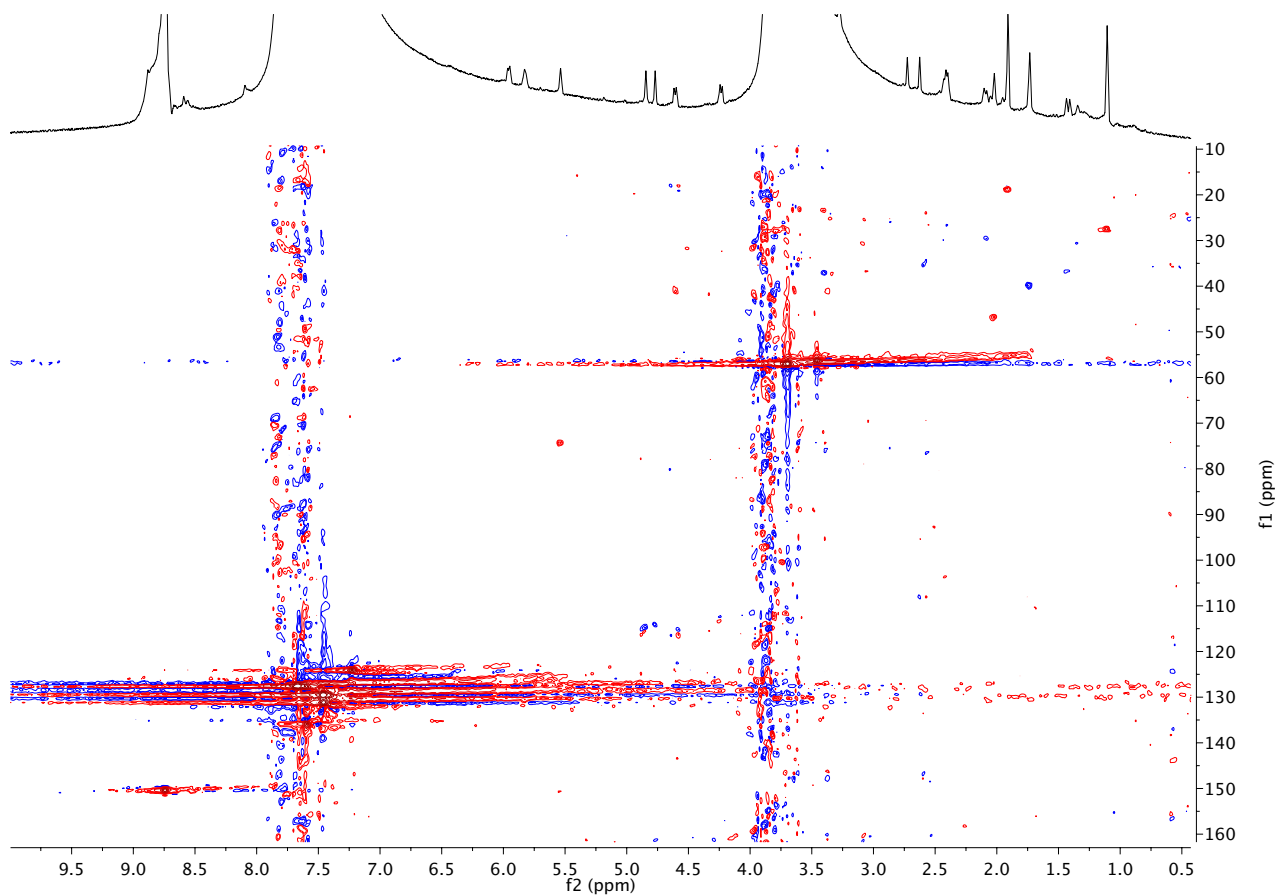

**Figure S75.** HSQC Spectrum of (*R*)-MTPA Ester of **1** (**1b**) in Pyridine-*d*<sub>5</sub>

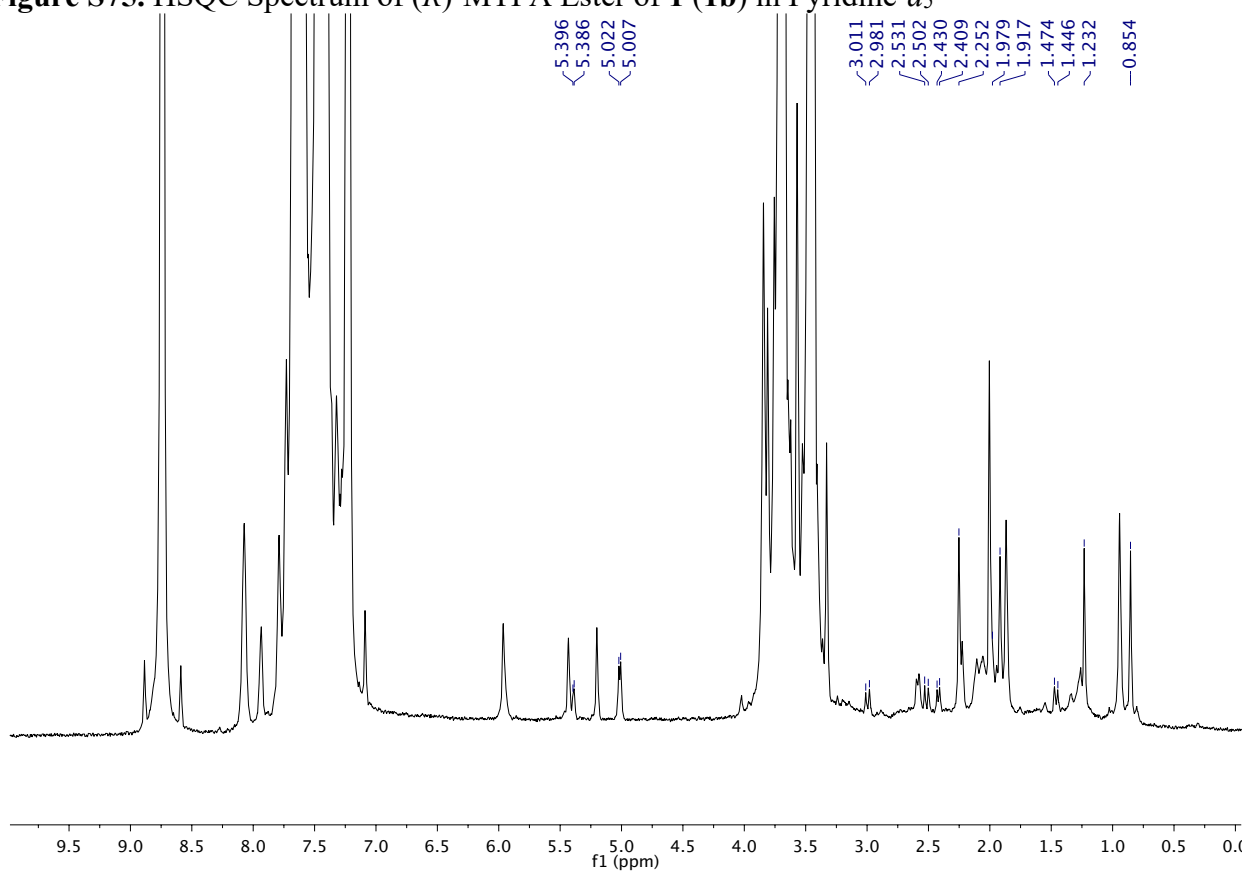

**Figure S76.** <sup>1</sup>H Spectrum of (*S*)-MTPA Ester of **2** (**2a**) in Pyridine-*d*<sub>5</sub>

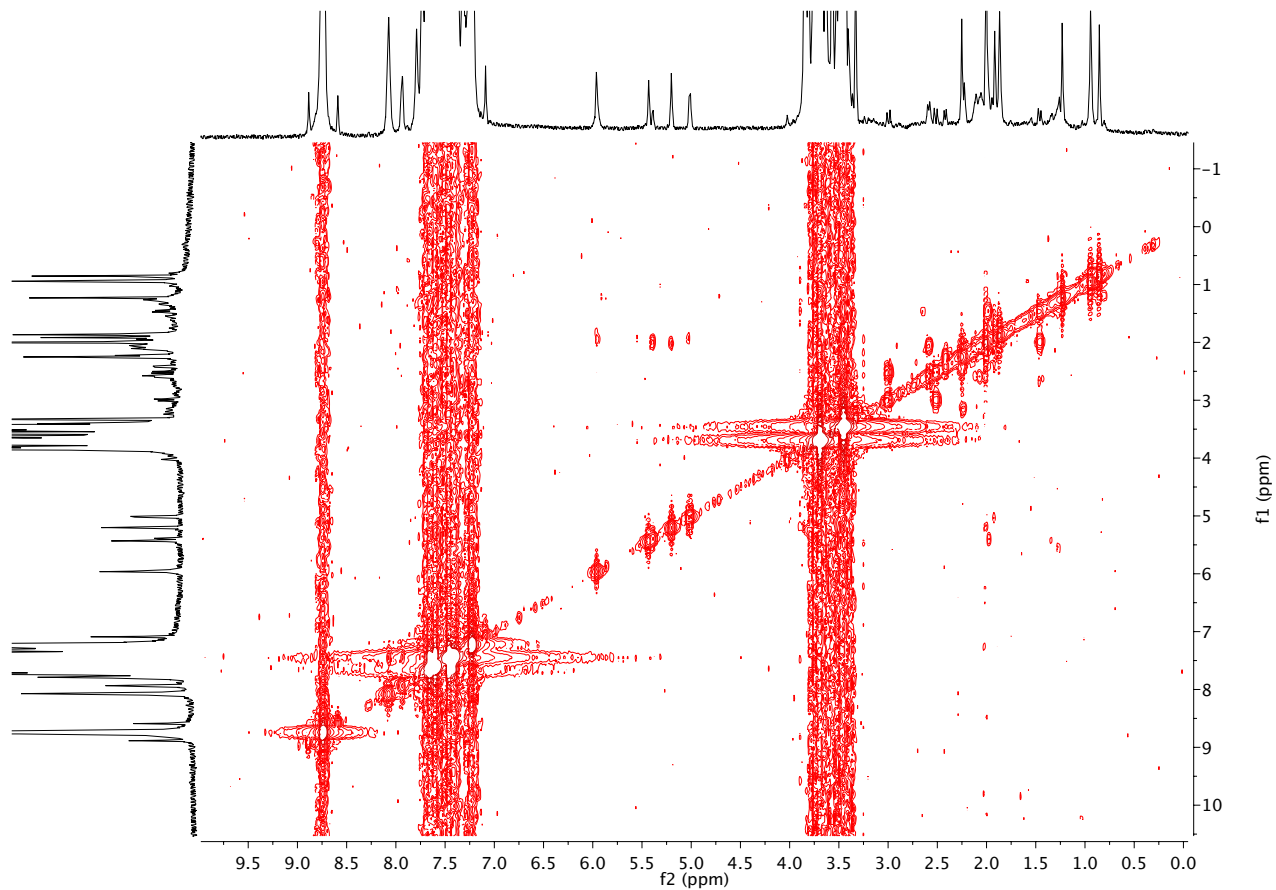

**Figure S77.** COSY Spectrum of (*S*)-MTPA Ester of **2** (**2a**) in Pyridine-*d*<sub>5</sub>

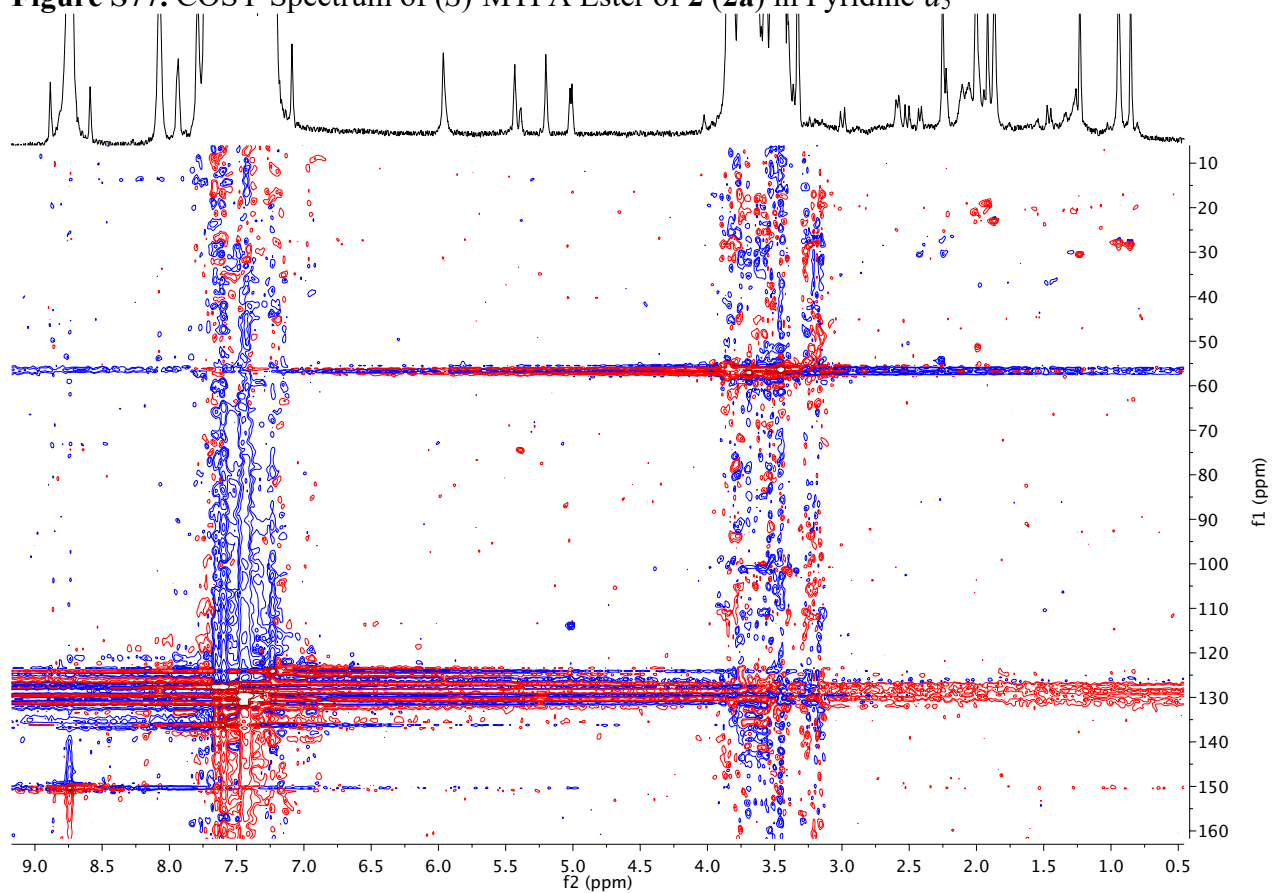

**Figure S78.** HSQC Spectrum of (*S*)-MTPA Ester of **2** (**2a**) in Pyridine-*d*<sub>5</sub>

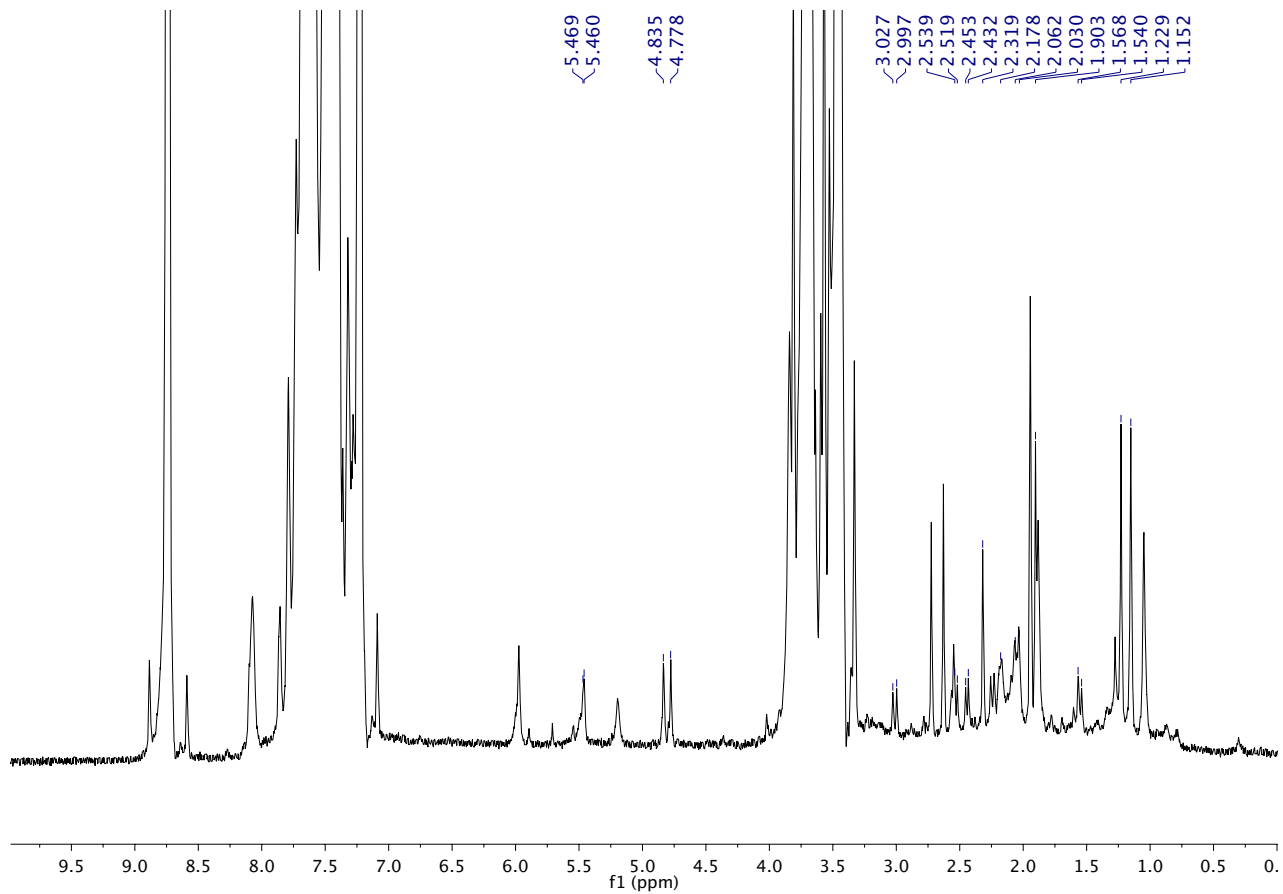

**Figure S79.**  $^1\text{H}$  Spectrum of (*R*)-MTPA Ester of **2** (**2b**) in Pyridine- $d_5$

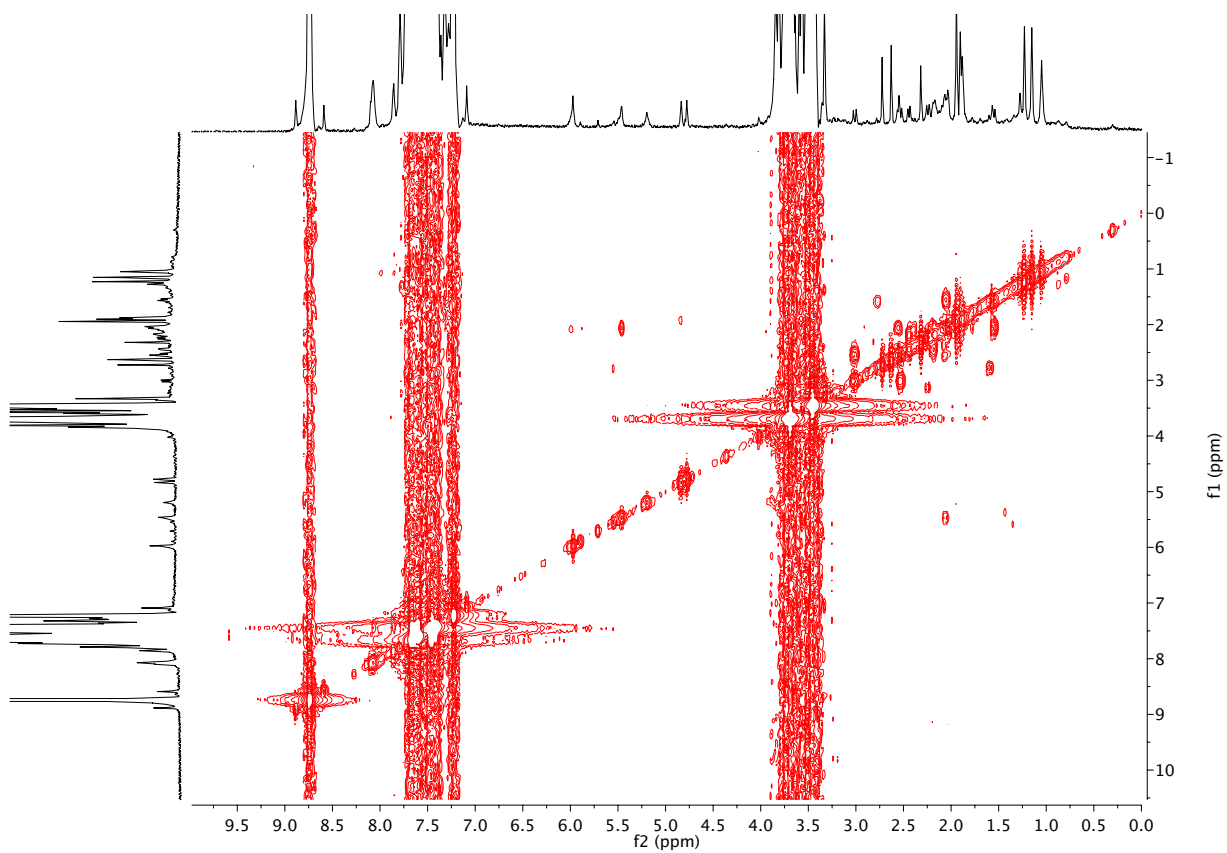

**Figure S80.** COSY Spectrum of (*R*)-MTPA Ester of **2** (**2b**) in Pyridine- $d_5$

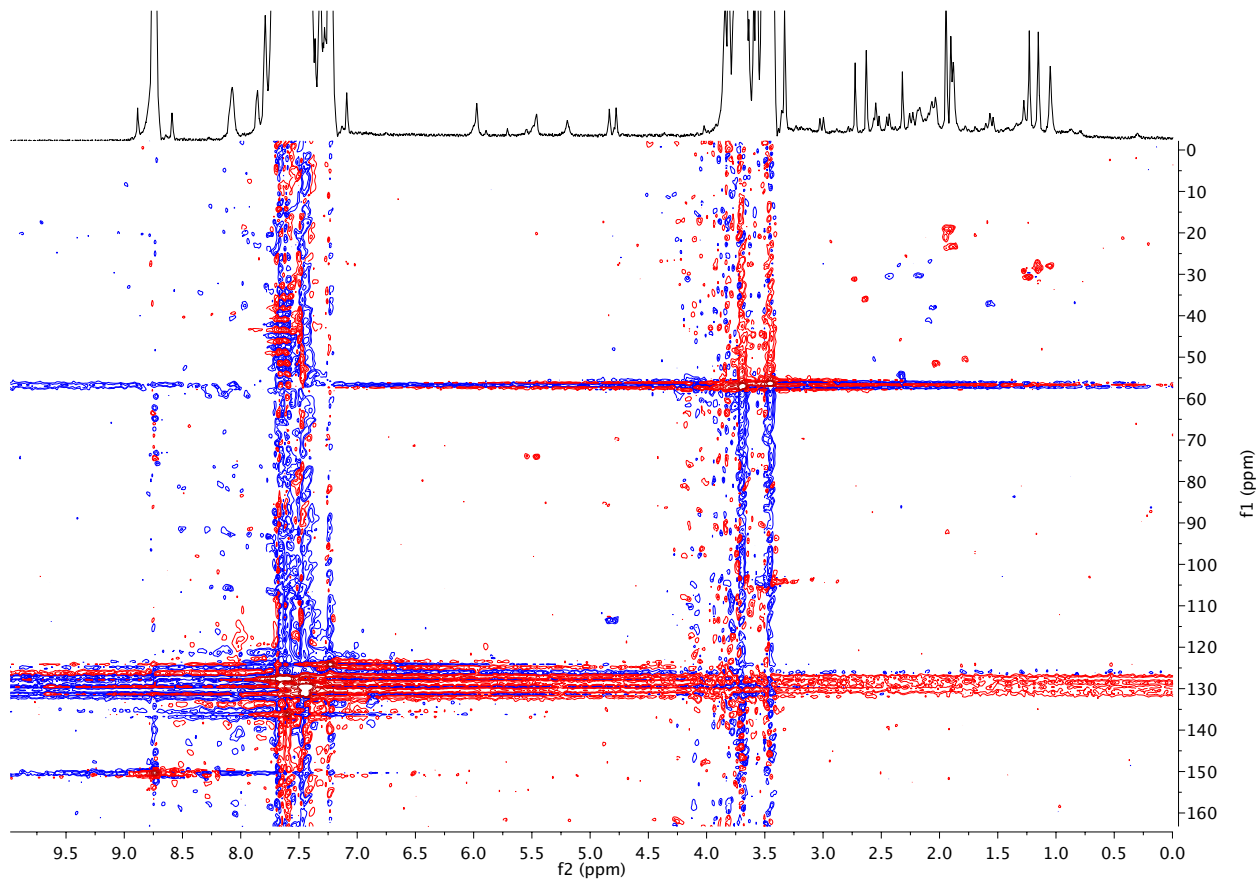

Figure S81. HSQC Spectrum of (*R*)-MTPA Ester of **2** (**2b**) in Pyridine-*d*<sub>5</sub>

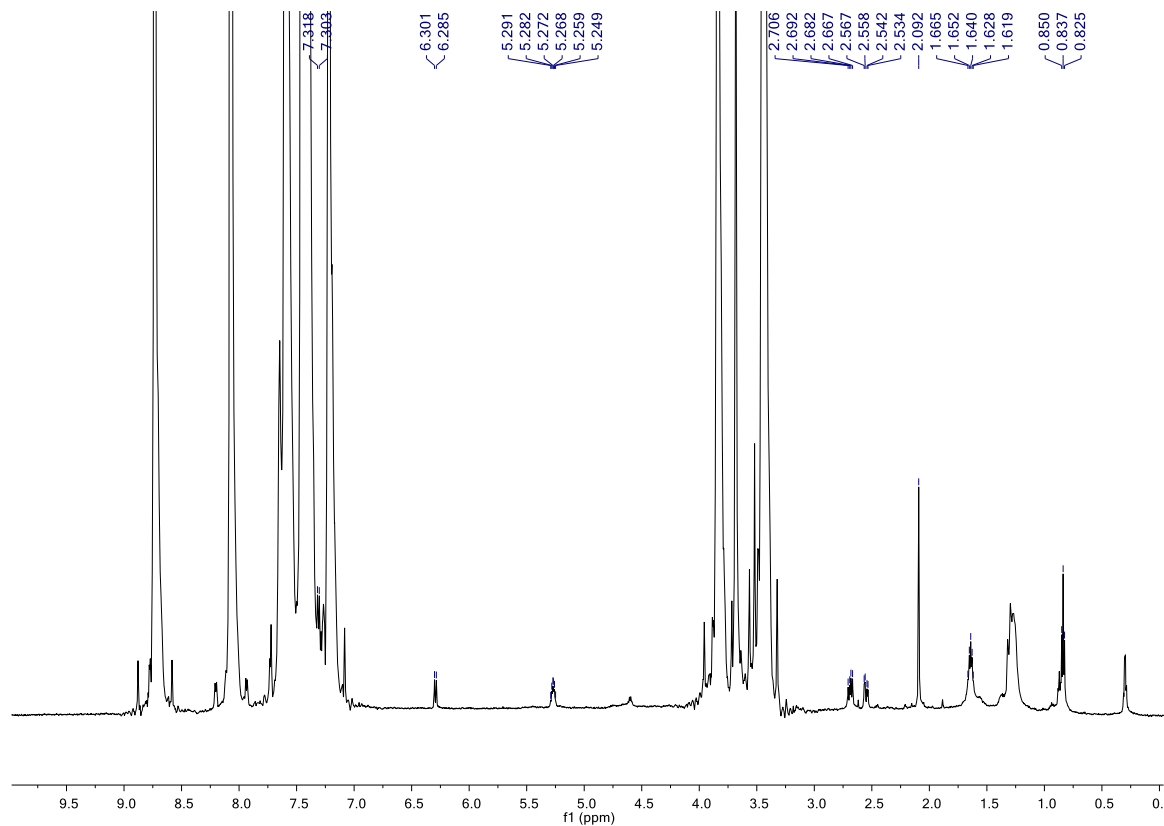

Figure S82. <sup>1</sup>H Spectrum of (*S*)-MTPA Ester of **11** (**11a**) in Pyridine-*d*<sub>5</sub>

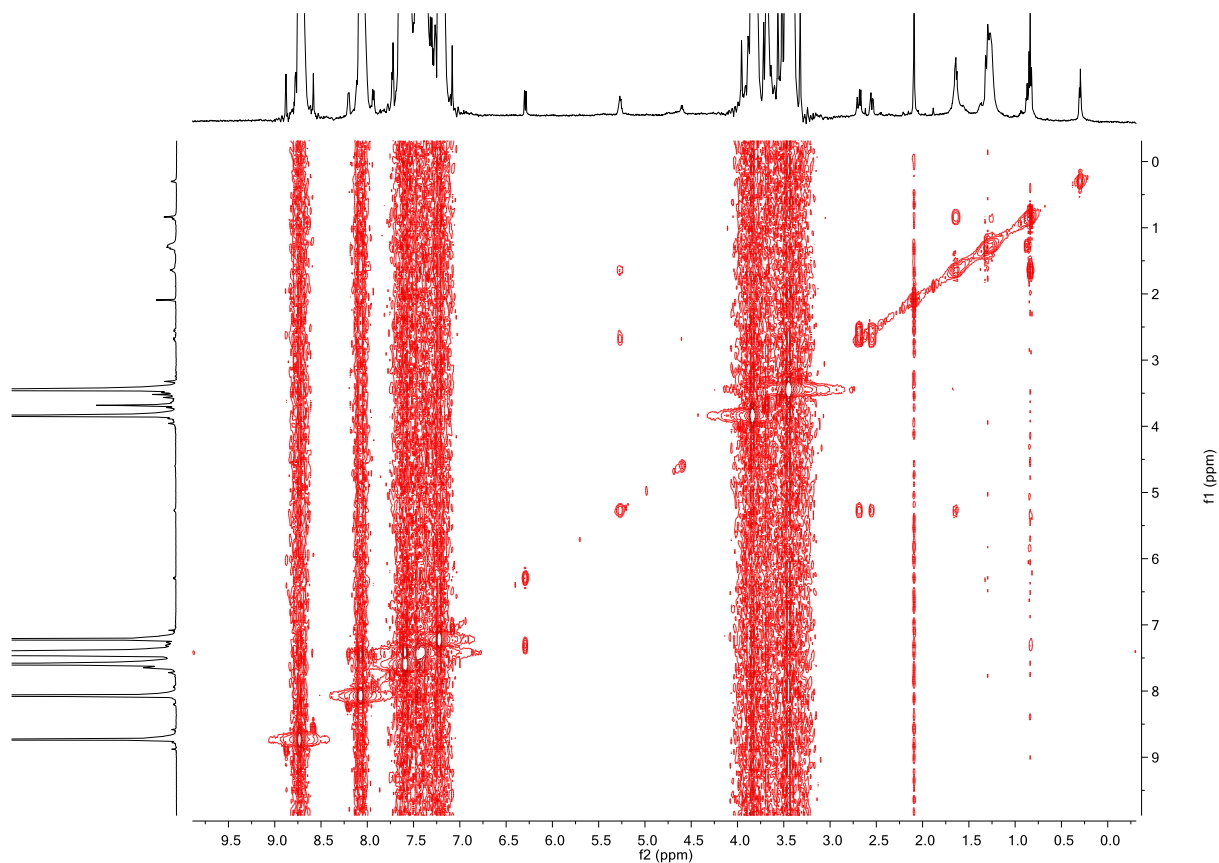

**Figure S83.** COSY Spectrum of (*S*)-MTPA Ester of **11** (**11a**) in Pyridine-*d*<sub>5</sub>

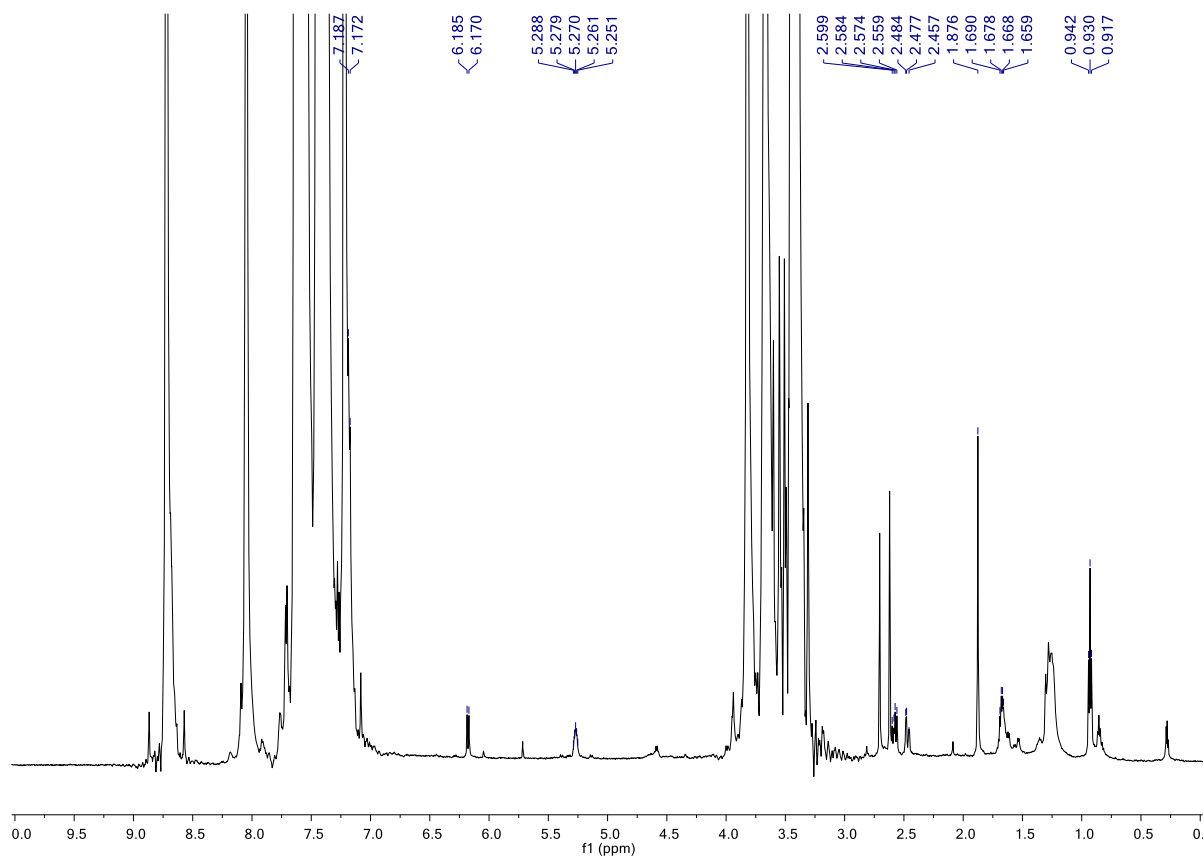

**Figure S84.** <sup>1</sup>H Spectrum of (*R*)-MTPA Ester of **11** (**11b**) in Pyridine-*d*<sub>5</sub>

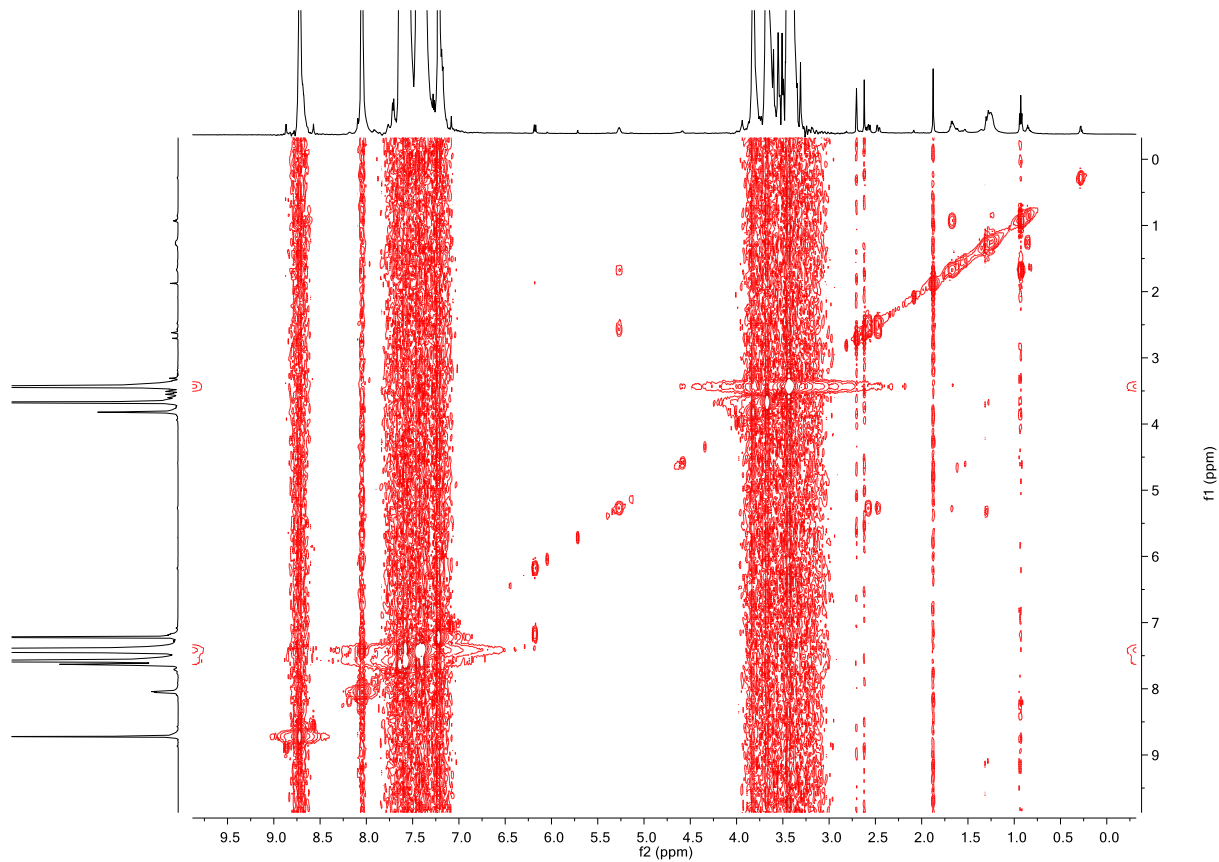

**Figure S85.** COSY Spectrum of (*R*)-MTPA Ester of **11** (**11b**) in Pyridine-*d*<sub>5</sub>

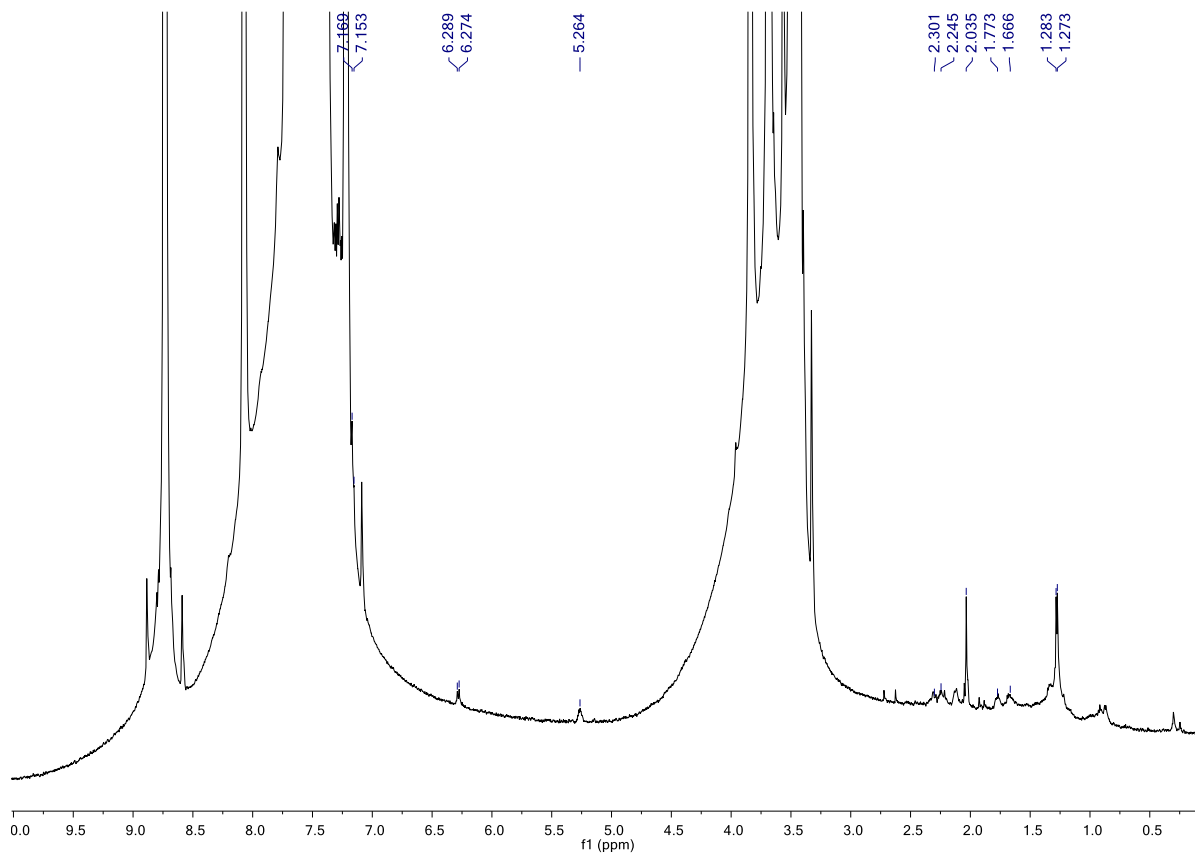

**Figure S86.** <sup>1</sup>H Spectrum of (*S*)-MTPA Ester of **12** (**12a**) in Pyridine-*d*<sub>5</sub>



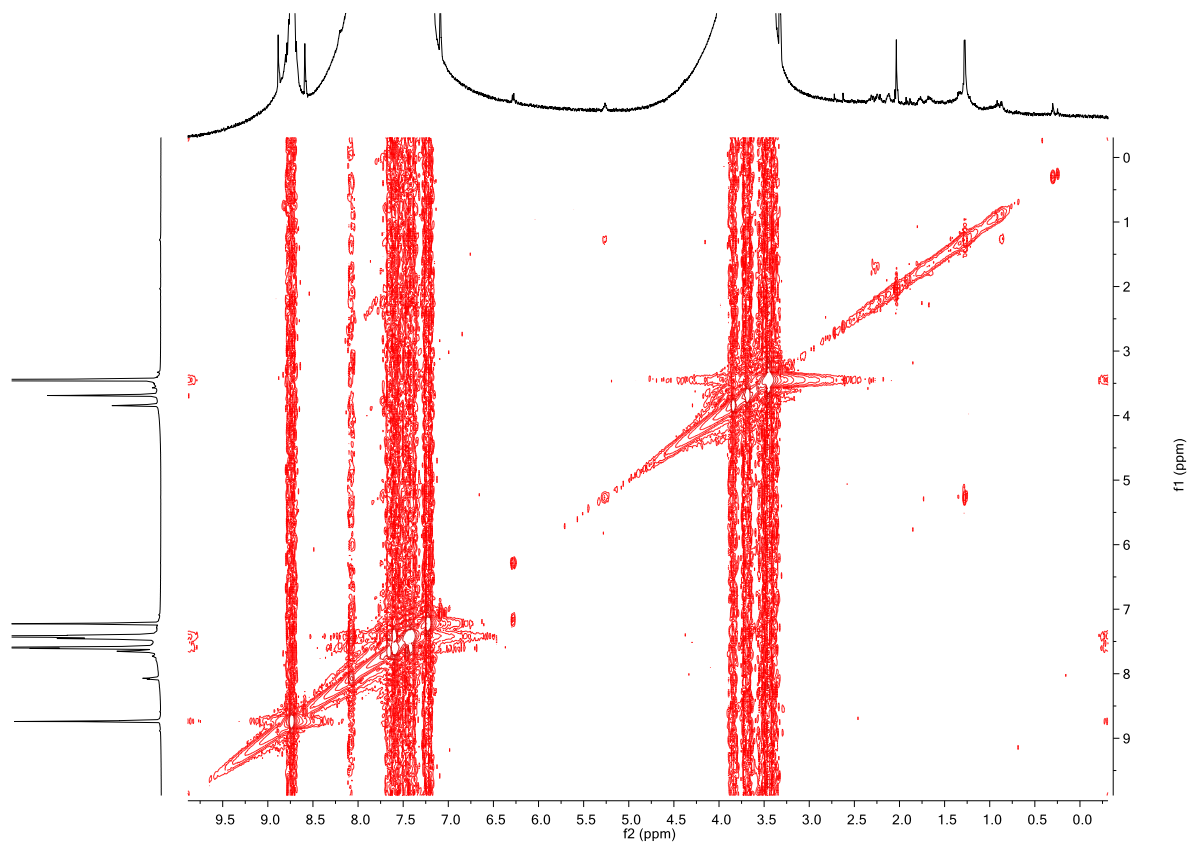

**Figure S87.** COSY Spectrum of (*S*)-MTPA Ester of **12** (**12a**) in Pyridine-*d*<sub>5</sub>

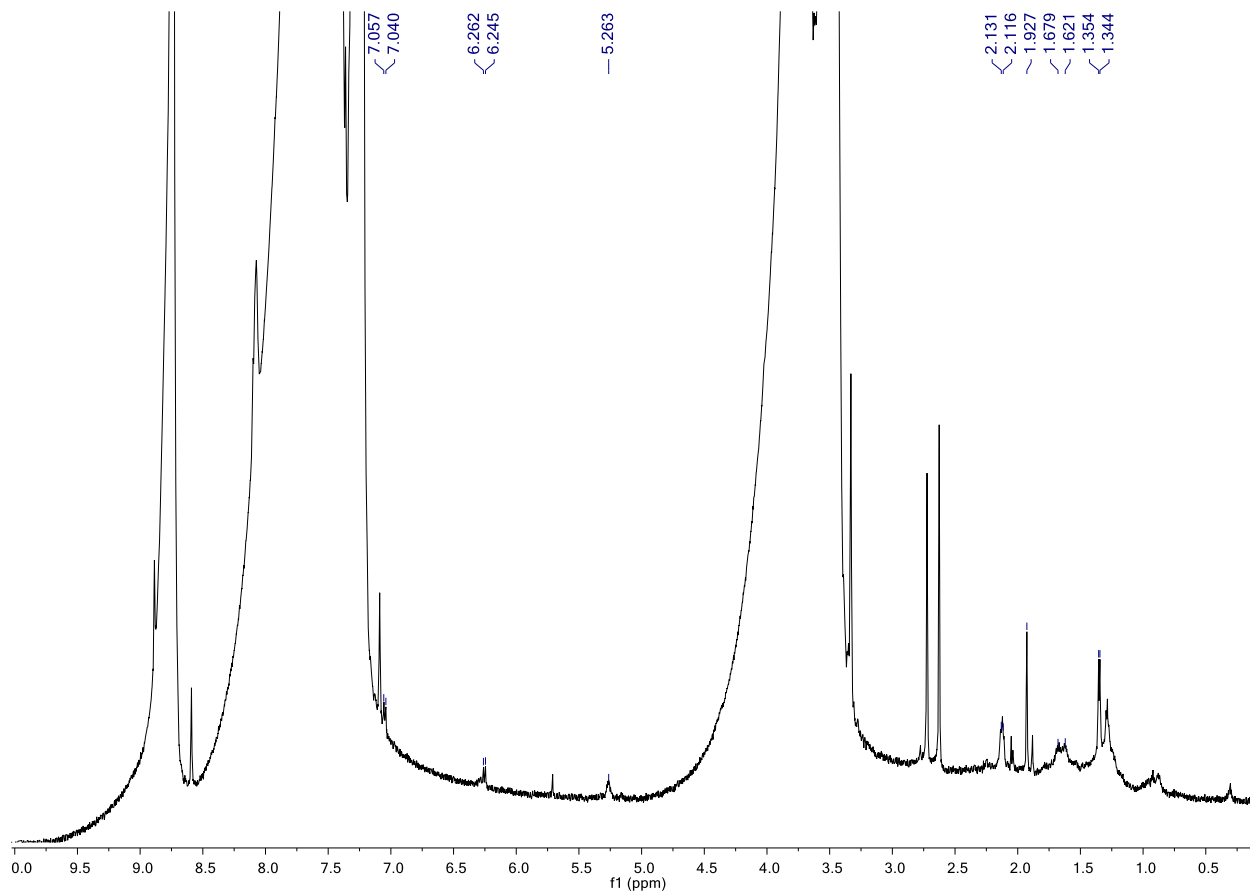

**Figure S88.** <sup>1</sup>H Spectrum of (*R*)-MTPA Ester of **12** (**12b**) in Pyridine-*d*<sub>5</sub>

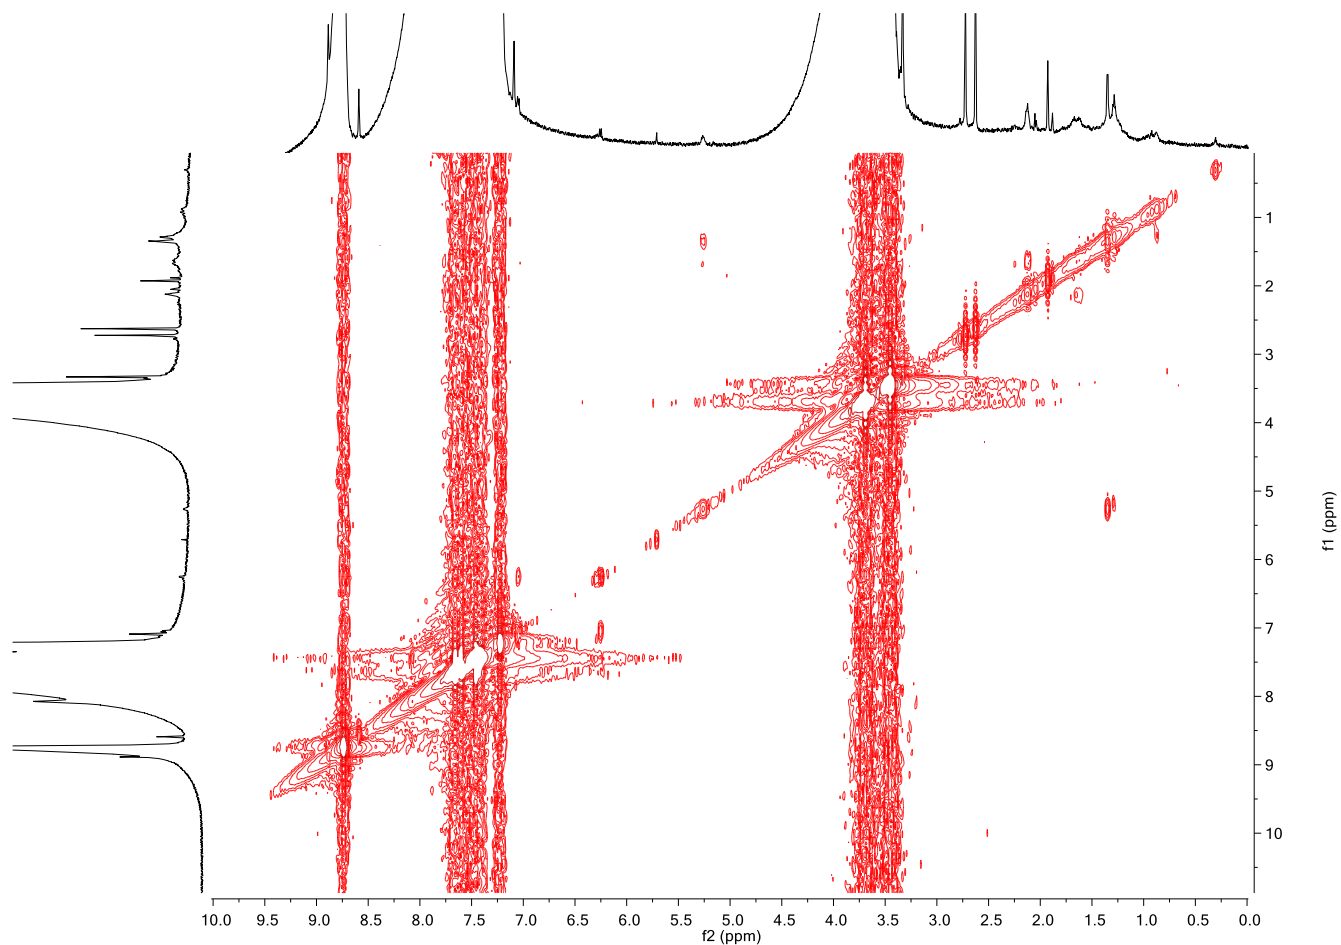

**Figure S89.** COSY Spectrum of (*R*)-MTPA Ester of **12** (**12b**) in Pyridine-*d*<sub>5</sub>

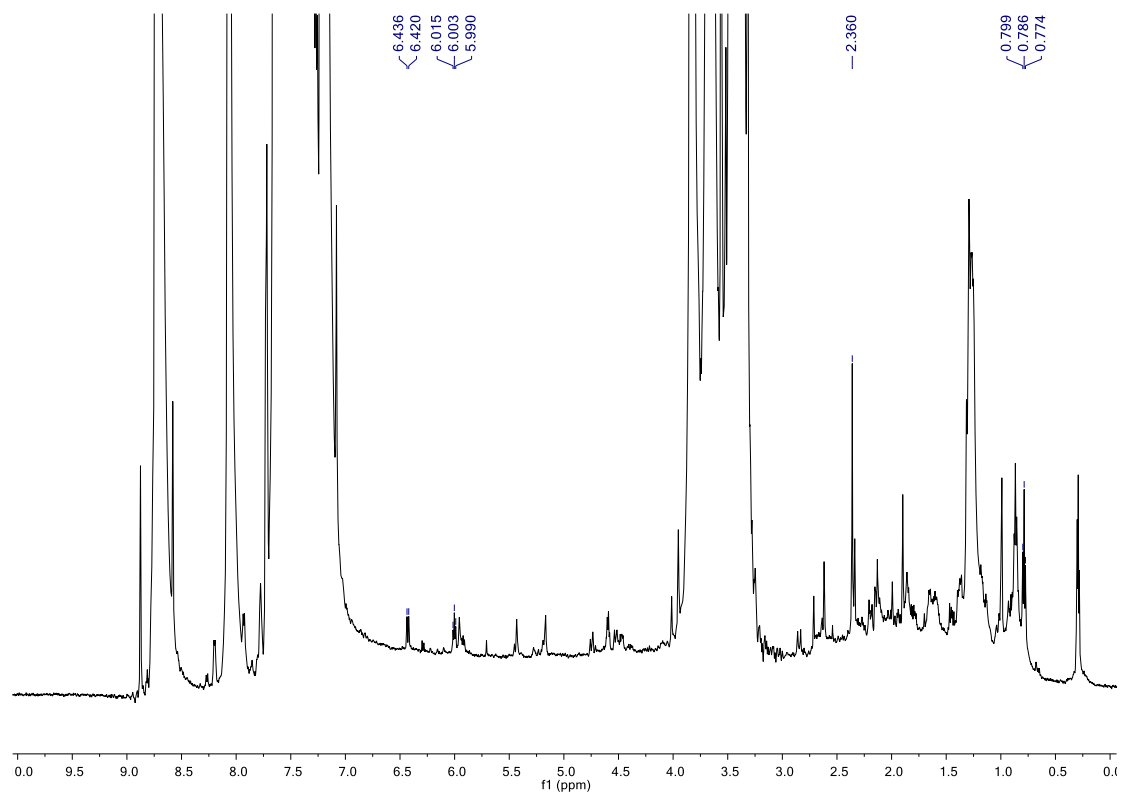

**Figure S90.** <sup>1</sup>H Spectrum of (*S*)-MTPA Ester of **13** (**13a**) in Pyridine-*d*<sub>5</sub>

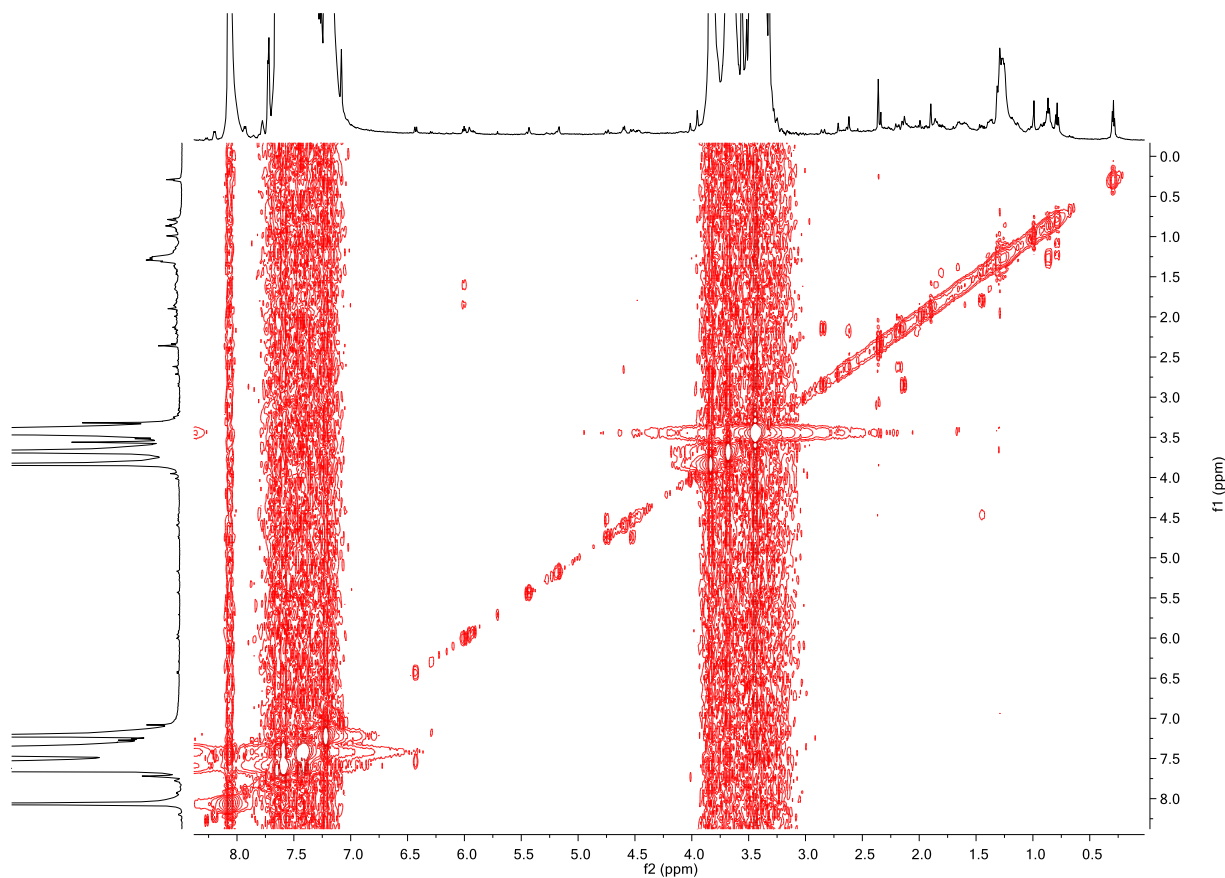

**Figure S91.** COSY Spectrum of (*S*)-MTPA Ester of **13** (**13a**) in Pyridine-*d*<sub>5</sub>

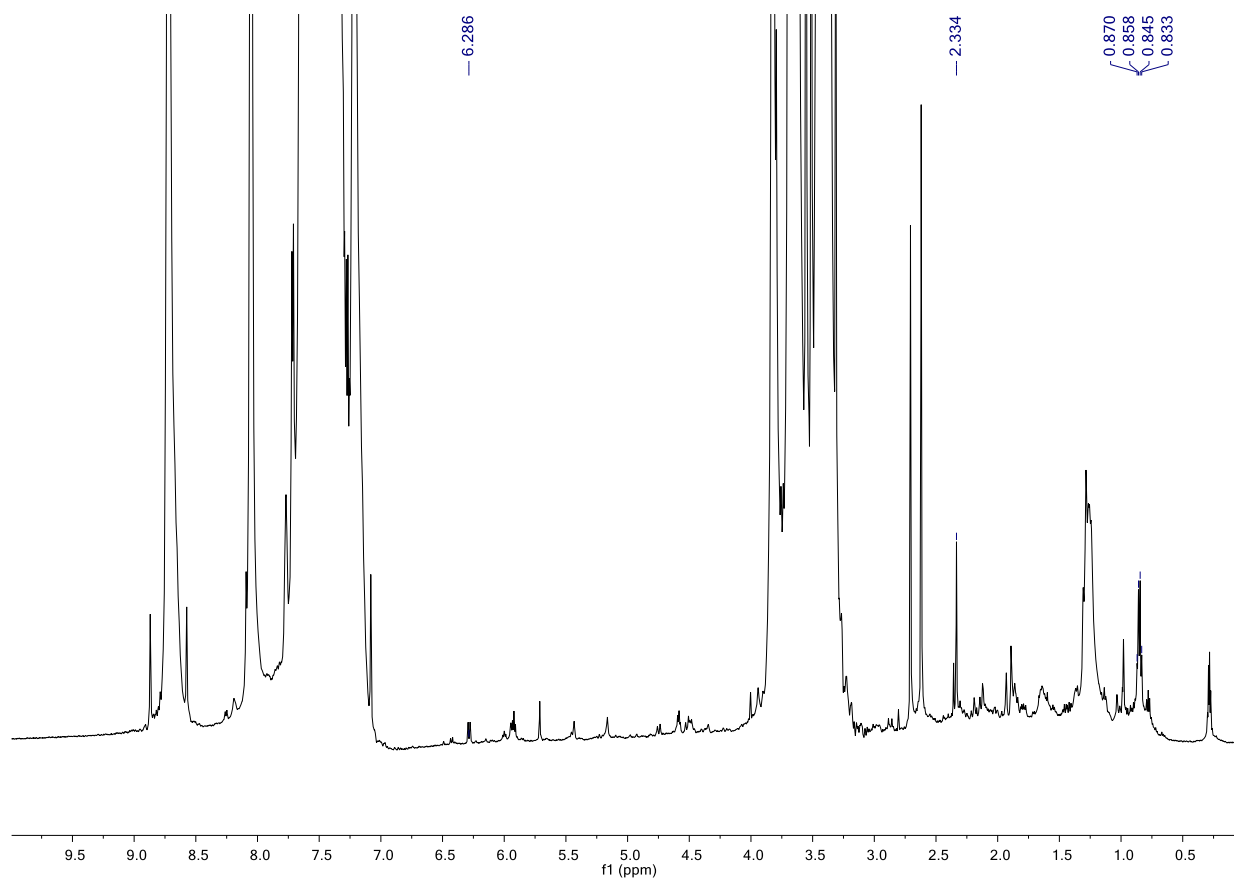

**Figure S92.** <sup>1</sup>H Spectrum of (*R*)-MTPA Ester of **13** (**13b**) in Pyridine-*d*<sub>5</sub>

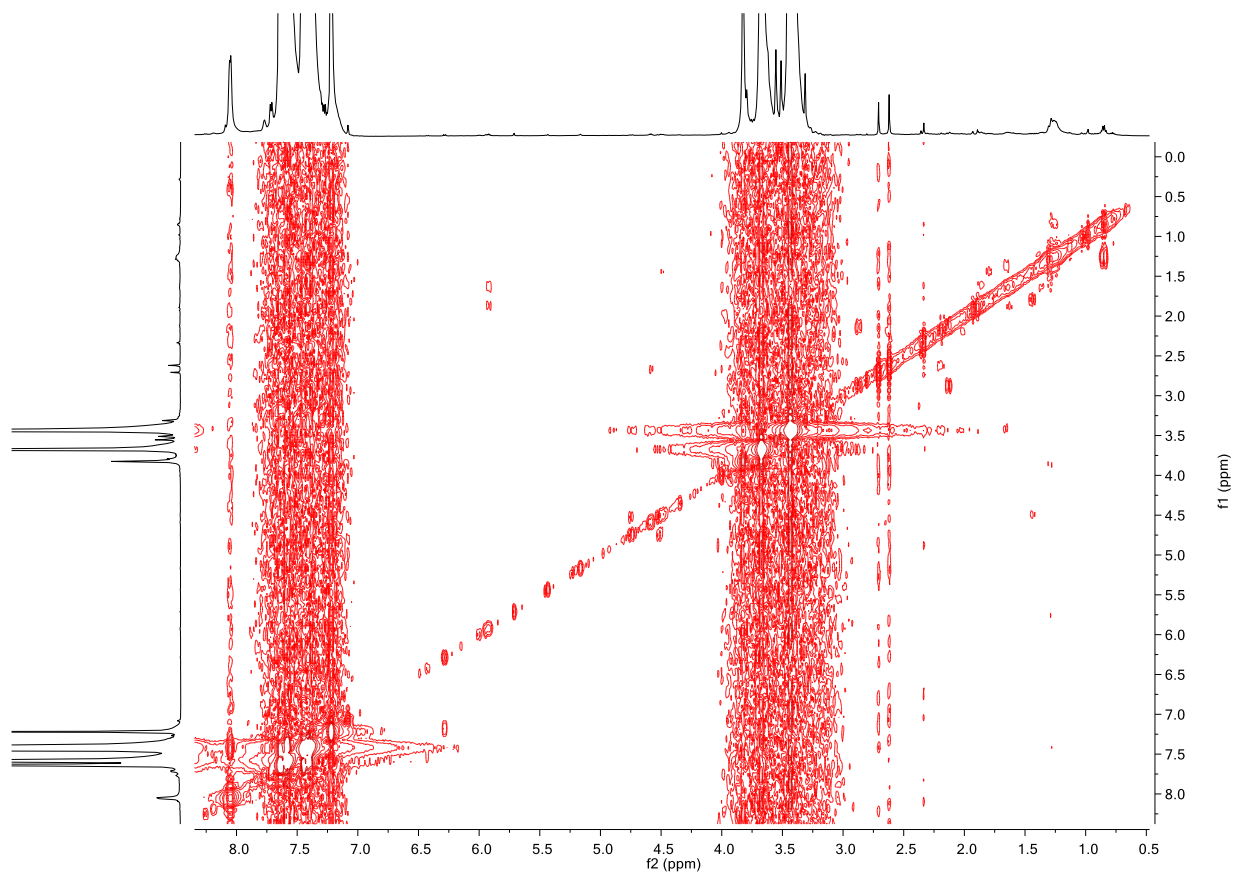

**Figure S93.** COSY Spectrum of (*R*)-MTPA Ester of **13** (**13b**) in Pyridine-*d*<sub>5</sub>

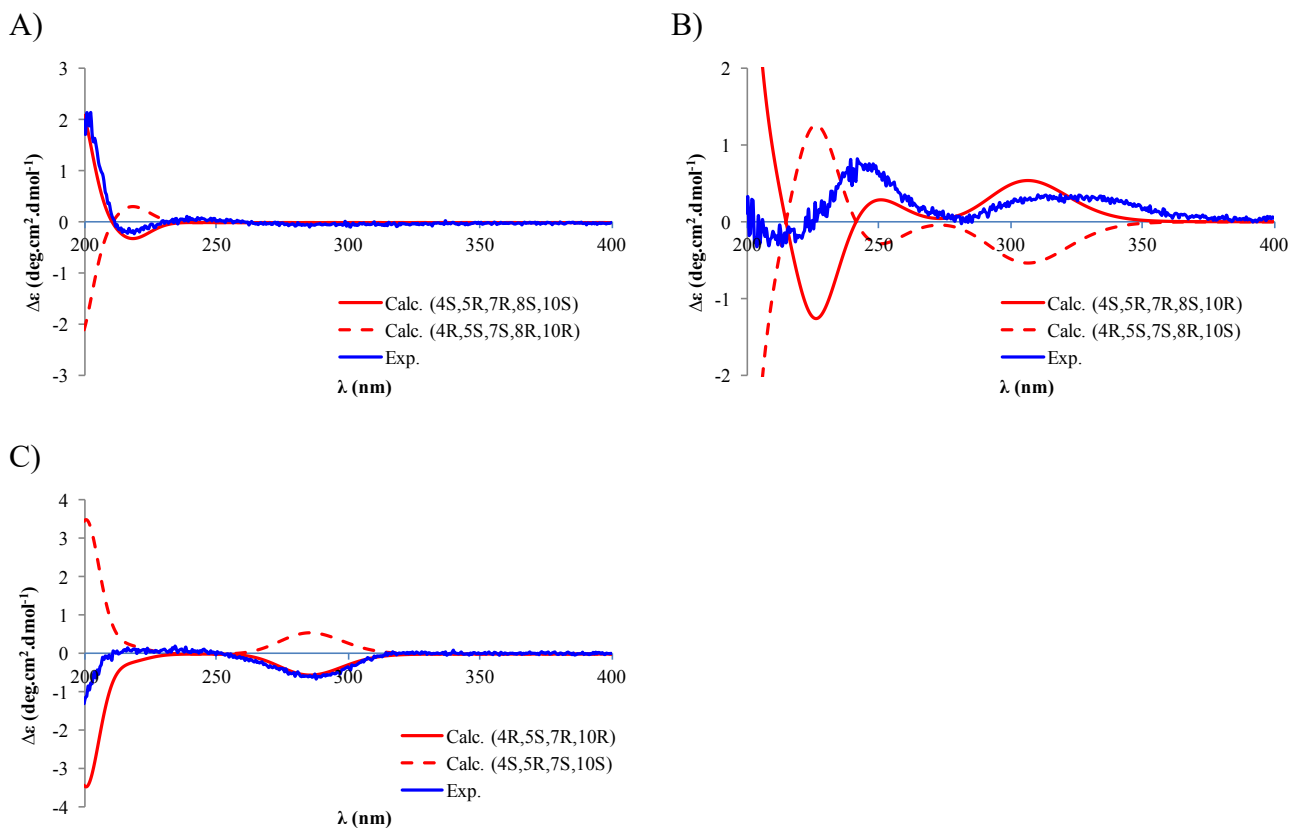

**Figure S94.** A) Experimental ECD spectrum of **1** and calculated ECD spectra of (4*S*, 5*R*, 7*R*, 8*S*, 10*S*)-**1** and (4*R*, 5*S*, 7*S*, 8*R*, 10*R*)-**1**; B) Experimental ECD spectrum of **2** and calculated ECD spectra of (4*S*, 5*R*, 7*R*, 8*S*, 10*R*)-**2** and (4*R*, 5*S*, 7*S*, 8*R*, 10*S*)-**2**; C) Experimental ECD spectrum of **3** and calculated ECD spectra of (4*R*, 5*S*, 7*R*, 10*R*)-**3** and (4*S*, 5*R*, 7*S*, 10*S*)-**3**;

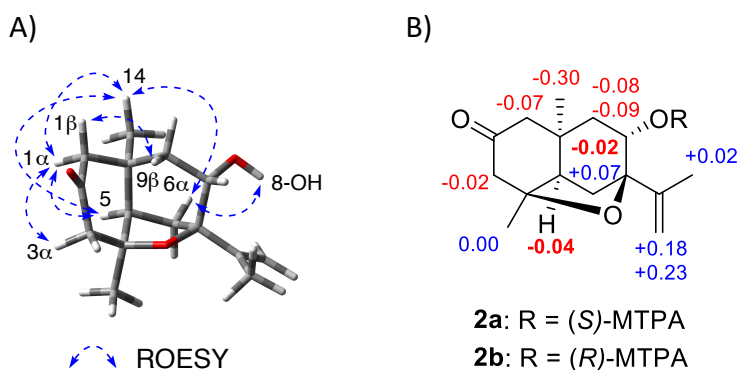

**Figure S95.** A: Key ROESY correlations of **2**. B: Mosher's ester analysis of MTPA-**2** (irregular  $\Delta\delta^{SR}$  signs in bold).

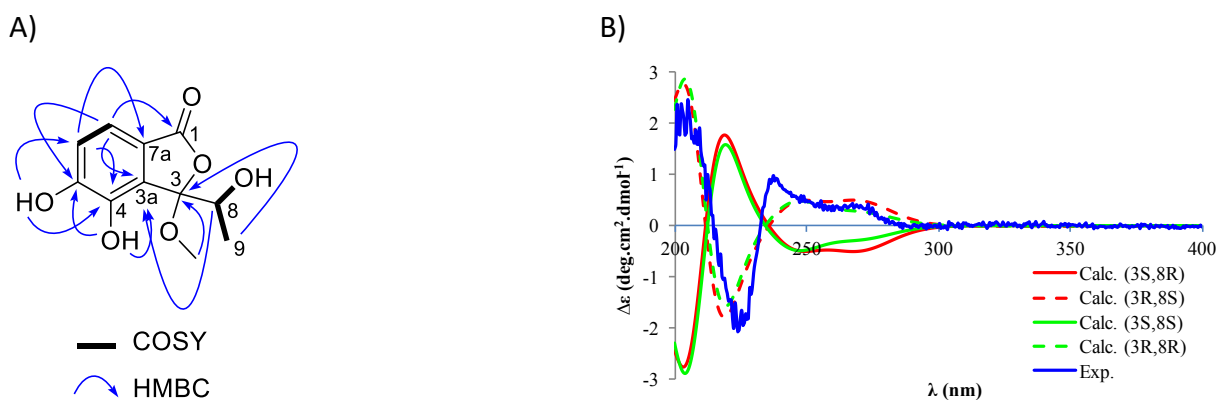

**Figure S96.** A: Key COSY and HMBC correlations for dictyophthalide A (**5**). B: The experimental ECD spectrum of **5** and calculated ECD spectra of (*3S*, *8R*)-**5**, (*3R*, *8S*)-**5**, (*3S*, *8S*)-**5** and (*3R*, *8R*)-**5**.

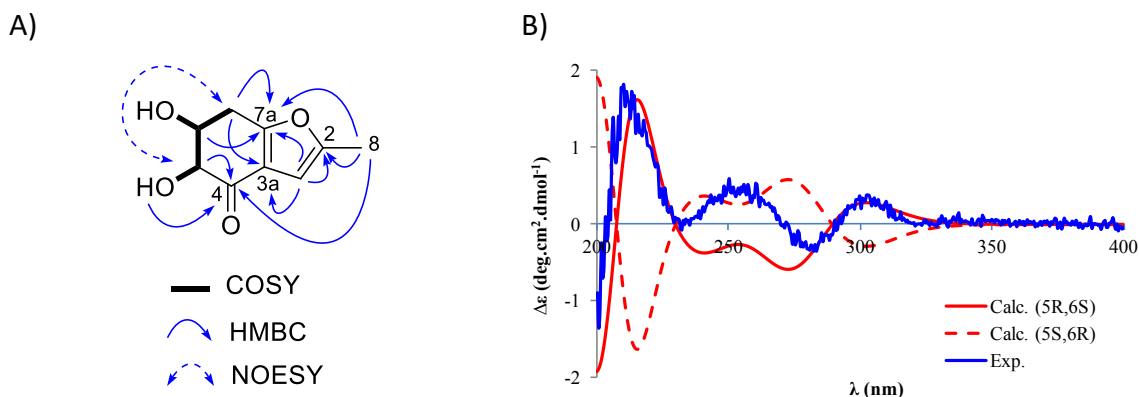

**Figure S97.** A: Key COSY, HMBC, and NOESY correlations for dictyofuran A (**6**). B: Comparison of the experimental (blue) and calculated (red) ECD spectra of **6**.

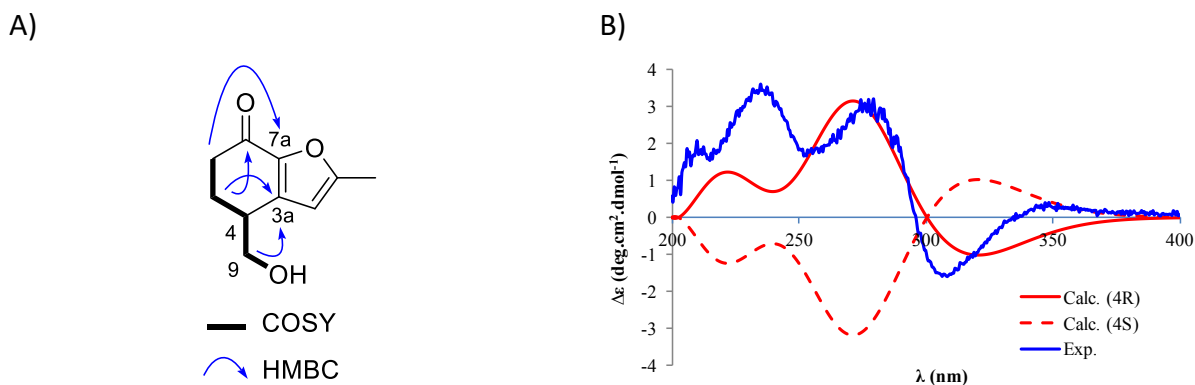

**Figure S98.** A: Key COSY and HMBC correlations of dictyofuran B (**7**). B: Comparison of the experimental (blue) and calculated (red) ECD spectra of **7**.

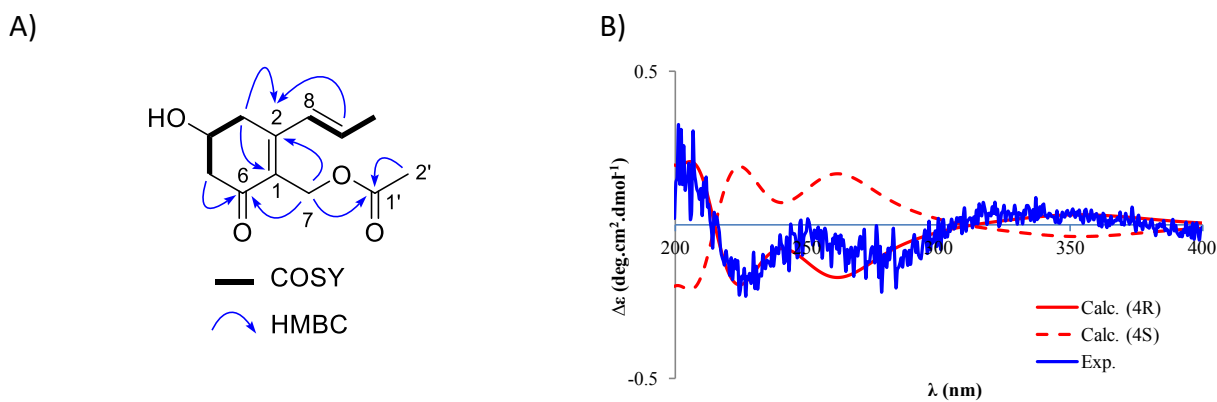

**Figure S99.** A: Key COSY and HMBC correlations for dictyosporone A (**10**). B: Comparison of the experimental (blue) and calculated (red) ECD spectra of **10**.

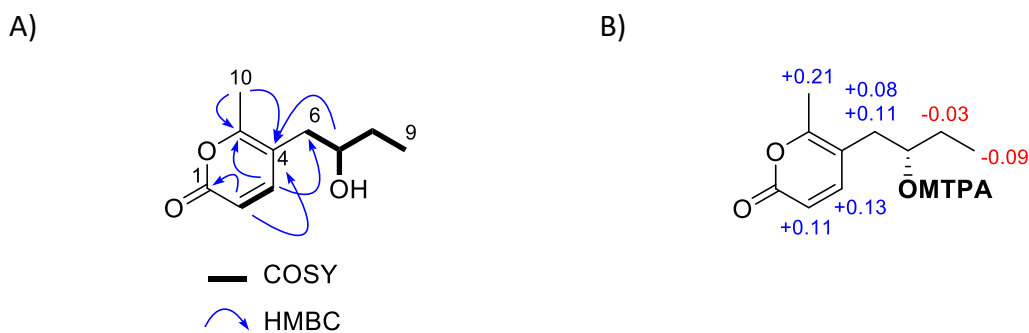

**Figure S100.** A: Key COSY and HMBC correlations of xylariolide E (**11**). B:  $\Delta\delta^{S-R}$  values for the Mosher's ester derivatives of **11**.

A)

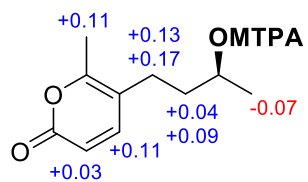

B)

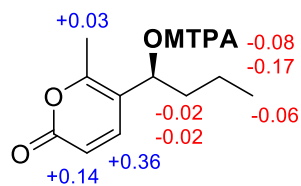

**Figure S101.** **A:**  $\Delta\delta^{S-R}$  values for the Mosher's ester derivatives of xylariolide F (**12**). **B:**  $\Delta\delta^{S-R}$  values for the Mosher's ester derivatives of **13**.
